# Supplementary material for: Redox Chemistry of Heterobimetallic Polypnictogen Triple‐Decker Complexes – Rearrangement, Fragmentation and Transfer
Source: PubMed Central journal article supplement — Chemistry. 2021 May 19;27(35):9129–40. doi: 10.1002/chem.202100844 (PMC8360055; doi:10.1002/chem.202100844), 2021-05-19
Supplement: CHEM-27-9129-s001.pdf [file CHEM-27-9129-s001.pdf]

# Chemistry–A European Journal

Supporting Information

## **Redox Chemistry of Heterobimetallic Polypnictogen Triple-Decker Complexes – Rearrangement, Fragmentation and Transfer**

Martin Piesch, Stephan Reichl, Christoph Riesinger, Michael Seidl, Gabor Balazs, and  
Manfred Scheer\*

|                                                                                                                                         |    |
|-----------------------------------------------------------------------------------------------------------------------------------------|----|
| 1. EPR studies.....                                                                                                                     | 4  |
| 1.1 [(Cp*Fe)(Cp'''Co)(μ,η <sup>5</sup> :η <sup>5</sup> -P <sub>5</sub> )] [FAI] (3) .....                                               | 4  |
| 1.2 [(Cp*Fe)(Cp'''Co)(μ,η <sup>5</sup> :η <sup>5</sup> -As <sub>5</sub> )] [FAI] (4).....                                               | 5  |
| 1.3 [K(18-c-6)(thf) <sub>2</sub> ][(Cp*Fe)(Cp'''Co)(μ,η <sup>4</sup> :η <sup>3</sup> -P <sub>5</sub> )] (7) .....                       | 6  |
| 1.4 [(Cp*Fe)(Cp'''Co)(μ,η <sup>5</sup> :η <sup>4</sup> -As <sub>5</sub> )] + KC <sub>8</sub> (precipitated crude reaction mixture)..... | 6  |
| 1.5 [(Cp'''Co)(Cp'''Ni)(μ,η <sup>3</sup> :η <sup>3</sup> -P <sub>3</sub> )] [FAI] (12) .....                                            | 7  |
| 1.6 [(Cp'''Co)(Cp'''Ni)(μ,η <sup>3</sup> :η <sup>3</sup> -As <sub>3</sub> )] [FAI] (13) .....                                           | 8  |
| 1.7 [(Cp'''Co)(Cp'''Ni)(μ,η <sup>3</sup> :η <sup>3</sup> :η <sup>1</sup> -P <sub>3</sub> ){W(CO) <sub>5</sub> }] [FAI] (21) .....       | 9  |
| 1.8 [K(2,2,2-crypt)][(Cp'''Co)(Cp'''Ni)(μ,η <sup>3</sup> :η <sup>3</sup> -P <sub>3</sub> )] .....                                       | 10 |
| 1.9 [K(2,2,2-crypt)][(Cp'''Co)(Cp'''Ni)(μ,η <sup>3</sup> :η <sup>3</sup> -As <sub>3</sub> )] (23) .....                                 | 11 |
| 2. NMR spectroscopic investigations .....                                                                                               | 12 |
| 2.1 [(Cp*Fe)(Cp'''Co)(μ,η <sup>5</sup> :η <sup>5</sup> -P <sub>5</sub> )] [FAI] (3) .....                                               | 12 |
| 2.2 [(Cp*Fe)(Cp'''Co)(μ,η <sup>5</sup> :η <sup>5</sup> -As <sub>5</sub> )] [FAI] (4).....                                               | 13 |
| 2.3 [(Cp*Fe)(Cp'''Co)(μ,η <sup>5</sup> :η <sup>5</sup> -P <sub>5</sub> )] [FAI] <sub>2</sub> (5) .....                                  | 14 |
| 2.4 [(Cp*Fe)(Cp'''Co)(μ,η <sup>5</sup> :η <sup>5</sup> -As <sub>5</sub> )] [FAI] <sub>2</sub> (6) .....                                 | 15 |
| 2.5 [K(2,2,2-crypt)][(Cp*Fe)(Cp'''Co)(μ,η <sup>5</sup> :η <sup>5</sup> -P <sub>5</sub> )] (7) .....                                     | 16 |
| 2.6 [(Cp*Fe)(Cp'''Co)(μ,η <sup>5</sup> :η <sup>5</sup> -As <sub>5</sub> )] (2) + KC <sub>8</sub> /2,2,2-cryptand .....                  | 17 |
| 2.7 [K(2,2,2-crypt)][(Cp*Fe)(Cp'''Co)(μ,η <sup>4</sup> :η <sup>4</sup> -As <sub>6</sub> )] (9) .....                                    | 18 |
| 2.8 Reaction of [(Cp'''Co)(Cp'''Ni)(μ,η <sup>3</sup> :η <sup>3</sup> -P <sub>3</sub> )] (10) with Ag[FAI].....                          | 19 |
| 2.9 [(Cp'''Co) <sub>2</sub> (μ,η <sup>3</sup> :η <sup>3</sup> -P <sub>3</sub> )] [FAI] (16) .....                                       | 21 |

|                                                                                                   |    |
|---------------------------------------------------------------------------------------------------|----|
| 2.10 Reaction of $[(Cp^*Co)(Cp^*Ni)(\mu, \eta^3:\eta^3-As_3)]$ (11) with $Ag[FAI]$ .....          | 22 |
| 2.11 $[(Cp^*Ni)_2(\mu, \eta^3:\eta^3-As_3)][FAI]$ (15) .....                                      | 24 |
| 2.12 $[(Cp^*Co)_2(\mu, \eta^3:\eta^3-As_3)][FAI]$ (17) .....                                      | 25 |
| 2.13 $[(Cp^*Co)(Cp^*Ni)(\mu, \eta^3:\eta^3-P_3)]$ (18) .....                                      | 26 |
| 2.14 $[(Cp^*Co)(Cp^*Ni)(\mu_4, \eta^3:\eta^2:\eta^1:\eta^1-P_3)Ag(CH_2Cl_2)_2][FAI]_2$ (19) ..... | 27 |
| 2.15 $[(Cp^*Co)(Cp^*Ni)(\mu, \eta^3:\eta^3:\eta^1-P_3)\{W(CO)_5\}][FAI]$ (21) .....               | 28 |
| 2.16 $[K(2,2,2-crypt)][(Cp^*Co)(Cp^*Ni)(\mu, \eta^3:\eta^3-P_3)]$ (22) .....                      | 29 |
| 2.17 $[K(2,2,2-crypt)][(Cp^*Co)(Cp^*Ni)(\mu, \eta^3:\eta^3-As_3)]$ (23) .....                     | 30 |
| 3. Cyclic voltametric measurements .....                                                          | 31 |
| 3.1 $[(Cp^*Fe)(Cp^*Co)(\mu, \eta^5:\eta^5-P_5)]$ (1) .....                                        | 31 |
| 3.2 $[(Cp^*Fe)(Cp^*Co)(\mu, \eta^5:\eta^5-As_5)]$ (2) .....                                       | 32 |
| 3.3 $[(Cp^*Co)(Cp^*Ni)(\mu, \eta^3:\eta^3-P_3)]$ (10) .....                                       | 33 |
| 3.4 $[(Cp^*Co)(Cp^*Ni)(\mu, \eta^3:\eta^3-As_3)]$ (11) .....                                      | 34 |
| 4. Details on single crystal X-ray structure analysis .....                                       | 35 |
| 4.1 $[(Cp^*Fe)(Cp^*Co)(\mu, \eta^5:\eta^5-P_5)][FAI]$ (3) .....                                   | 36 |
| 4.2 $[(Cp^*Fe)(Cp^*Co)(\mu, \eta^5:\eta^5-As_5)][FAI]$ (4) .....                                  | 37 |
| 4.3 $[(Cp^*Fe)(Cp^*Co)(\mu, \eta^5:\eta^5-P_5)][FAI]_2$ (5) .....                                 | 38 |
| 4.4 $[(Cp^*Fe)(Cp^*Co)(\mu, \eta^5:\eta^5-As_5)][FAI]_2$ (6) .....                                | 39 |
| 4.5 $[K(2,2,2-crypt)][(Cp^*Fe)(Cp^*Co)(\mu, \eta^4:\eta^3-P_5)]$ (7) .....                        | 40 |
| 4.6 $[K(2,2,2-crypt)][(Cp^*Fe)(Cp^*Co)(\mu, \eta^4:\eta^4-As_6)]$ (9) .....                       | 41 |
| 4.7 $[(Cp^*Co)(Cp^*Ni)(\mu, \eta^3:\eta^3-As_3)]$ (11) .....                                      | 42 |
| 4.8 $[(Cp^*Ni)_2(\mu, \eta^3:\eta^3-As_3)][FAI]$ (15) .....                                       | 43 |
| 4.9 $[(Cp^*Co)_2(\mu, \eta^3:\eta^3-P_3)][FAI]$ (16) .....                                        | 44 |
| 4.10 $[(Cp^*Co)_2(\mu, \eta^3:\eta^3-As_3)][FAI]$ (17) .....                                      | 45 |
| 4.11 $[(Cp^*Co)(Cp^*Ni)(\mu, \eta^3:\eta^2-P_3)]$ (18) .....                                      | 46 |
| 4.12 $[(Cp^*Co)(Cp^*Ni)(\mu_4, \eta^3:\eta^2:\eta^1:\eta^1-P_3)Ag(CH_2Cl_2)_2][FAI]_2$ (19) ..... | 47 |
| 4.13 $[(Cp^*Co)(Cp^*Ni)(\mu, \eta^3:\eta^3:\eta^1-P_3)\{W(CO)_5\}][FAI]$ (21) .....               | 49 |
| 4.14 $[K(2,2,2-crypt)][(Cp^*Co)(Cp^*Ni)(\mu, \eta^3:\eta^3-P_3)]$ (22) .....                      | 50 |
| 4.15 $[K(2,2,2-cryptand)][(Cp^*Co)(Cp^*Ni)(\mu, \eta^3:\eta^3-As_3)]$ (23) .....                  | 51 |
| 4.16 $[Cp^*Ni(\eta^3-As_3)]$ .....                                                                | 52 |

|                                        |    |
|----------------------------------------|----|
| 4.17 Crystallographic information..... | 53 |
| 5. Computational Details .....         | 56 |
| 6. References.....                     | 82 |

# 1. EPR studies

## 1.1 $[(\text{Cp}^*\text{Fe})(\text{Cp}^*\text{Co})(\mu, \eta^5\text{:}\eta^5\text{-P}_5)][\text{FAI}]$ (**3**)

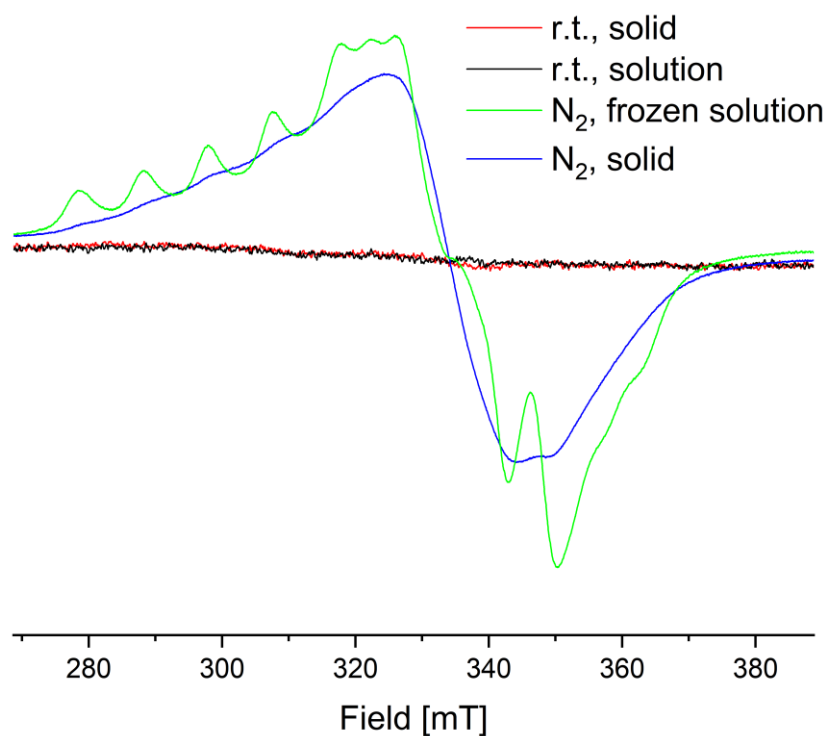

**Figure S1:** EPR spectra of **3** in solid state and frozen solution ( $\sigma\text{-C}_6\text{H}_4\text{F}_2$ ) at 77 K.

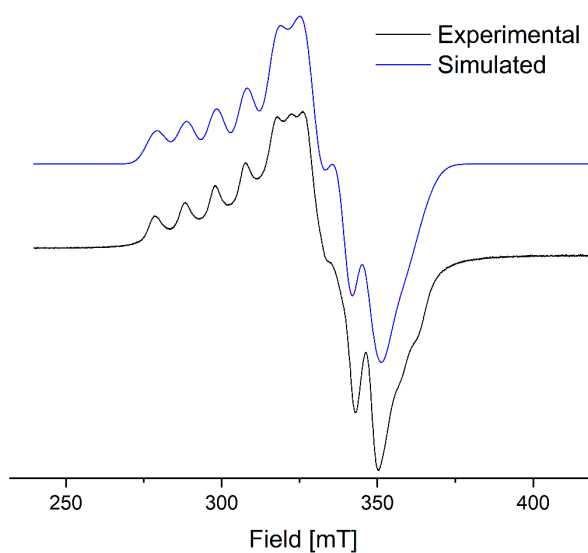

**Figure S2:** EPR spectra of **3** in solution ( $\sigma\text{-C}_6\text{H}_4\text{F}_2$ ) at 77 K (experimental (black) and simulated (blue)). Parameters for the fitting:  $g_1 = 2.155$ ,  $g_2 = 2.035$ ,  $g_3 = 1.948$ ,  $A_1^{\text{Co}} = 290.125$ ,  $A_2^{\text{Co}} = 55.125$ ,  $A_3^{\text{Co}} = 120.125$  MHz.

The simulation has been performed with the EasySpin program.<sup>[1]</sup>  
SysCo.Nucs = 'Co';  
SysCo.S = 7/2;  
SysCo.g = [ 2.15525 2.03525 1.948];  
SysCo.lw = [ 5 ];  
SysCo.A = [ 290.125 55.125 120.125];  
SysCo.HStrain = [ 180.25 150.25 150.25 ];

SysCo.AStrain = [ 40.25 40.25 80.25 ];  
Exp.mwFreq = 9.440920;  
Exp.Range = [239.6630 420.2450];  
Exp.nPoints = 4096;  
Exp.Temperature = 77;  
Exp.ModAmp = 0.2;

## 1.2 $[(\text{Cp}^*\text{Fe})(\text{Cp}'''\text{Co})(\mu, \eta^5: \eta^5\text{-As}_5)][\text{FAl}]$ (**4**)

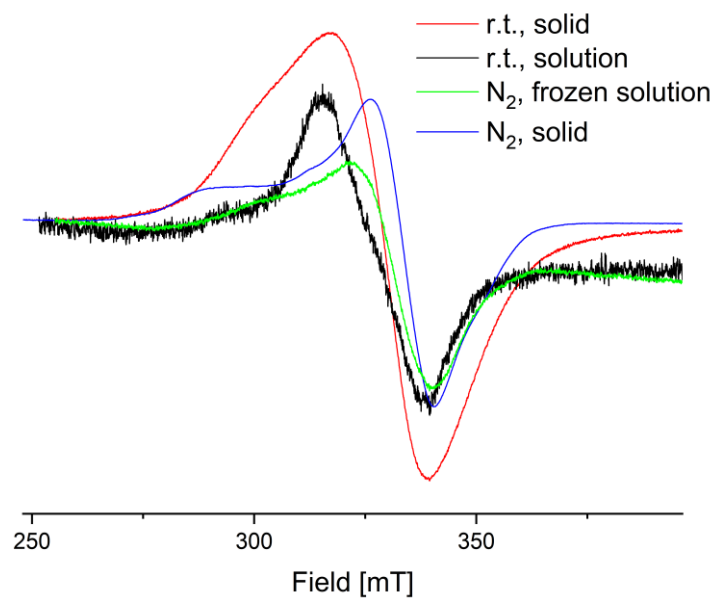

**Figure S3:** EPR spectra of **4** in solid state (r.t. (red), liquid nitrogen (blue) and in CH<sub>2</sub>Cl<sub>2</sub> solution (r.t. (black), frozen solution in liquid nitrogen (green)).

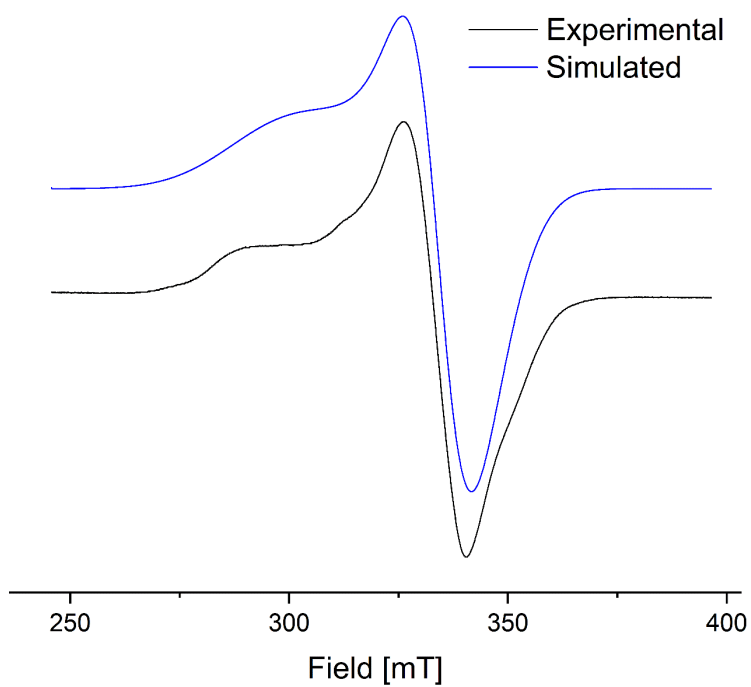

**Figure S4:** EPR spectra of **4** in solid state at 77 K (experimental (black) and simulated (blue)). Parameters for the fitting:  $g_1 = 2.235$ ,  $g_2 = 1.952$ ,  $g_3 = 1.896$ .

The simulation has been performed with the EasySpin program.<sup>11</sup>

Sys.S = 1/2;

Sys.g = [ 2.23533 1.9518 1.89552];

SysCo.lw = [ 20 ];

Sys.HStrain = [ 1239 412 639 ];

Exp.mwFreq = 9.440920;

Exp.Range = [239.6630 420.2450];

Exp.nPoints = 4096;

Exp.Temperature = 77;

Exp.ModAmp = 0.2;

### 1.3 [K(18-c-6)(thf)<sub>2</sub>][(Cp\*Fe)(Cp'''Co)(μ,η<sup>4</sup>:η<sup>3</sup>-P<sub>5</sub>)] (7)

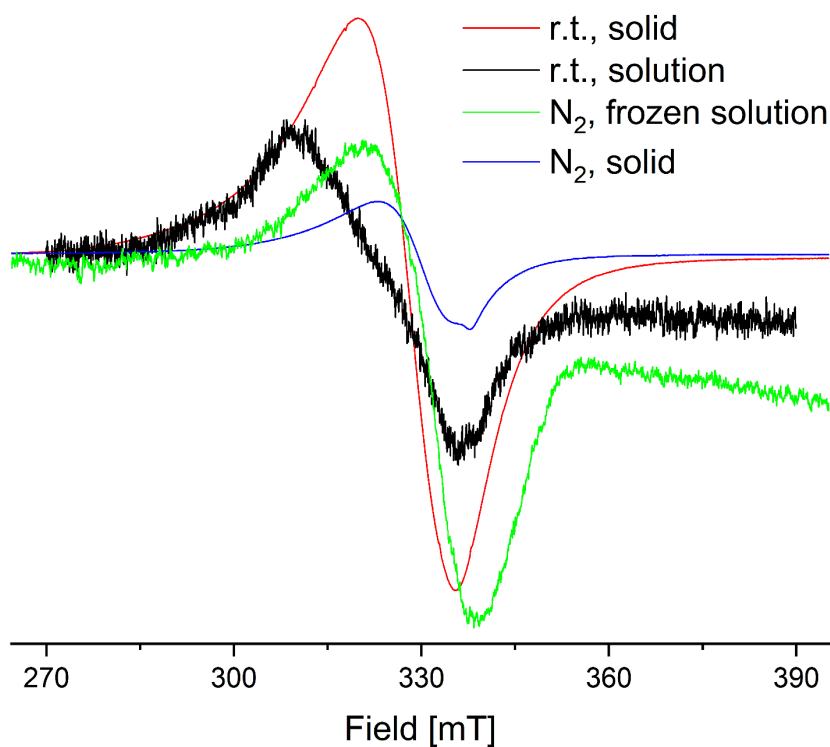

**Figure S5:** EPR spectra of 7 in solid state (r.t. (red), liquid nitrogen (blue) and in CH<sub>2</sub>Cl<sub>2</sub> solution (r.t. (black), frozen solution in liquid nitrogen (green)).

### 1.4 [(Cp\*Fe)(Cp'''Co)(μ,η<sup>5</sup>:η<sup>4</sup>-As<sub>5</sub>)] + KC<sub>8</sub> (precipitated crude reaction mixture)

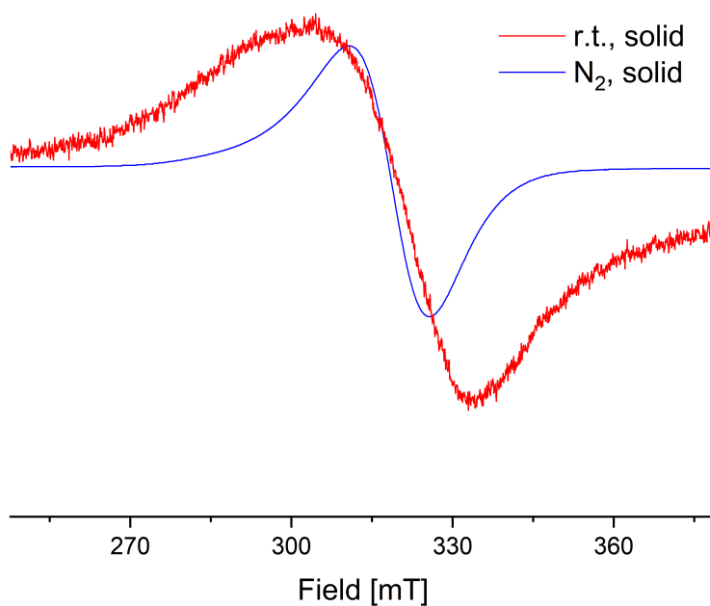

**Figure S6:** EPR spectra of precipitated solid obtained from the reaction of 2 with KC<sub>8</sub> in solid state (r.t. (black), liquid nitrogen (red)).

## 1.5 [(Cp''Co)(Cp'''Ni)( $\mu,\eta^3:\eta^3$ -P<sub>3</sub>)] [FAI] (12)

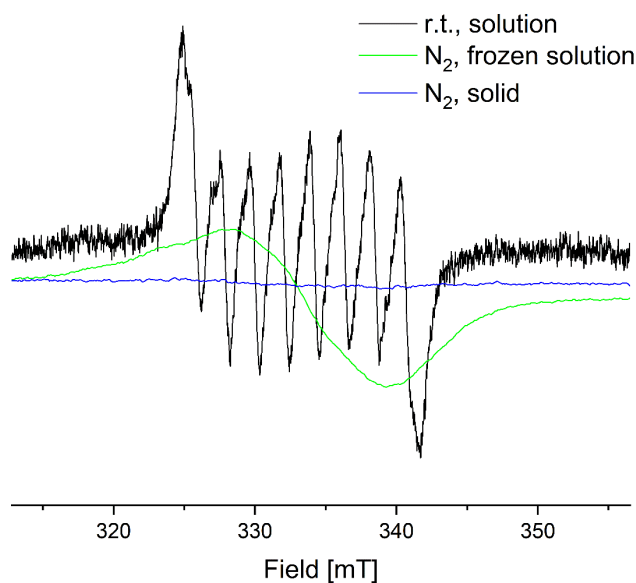

**Figure S7:** EPR spectra of **12** in solid state (liquid nitrogen (blue) and in CH<sub>2</sub>Cl<sub>2</sub> solution (r.t. (black), frozen solution in liquid nitrogen (green)).

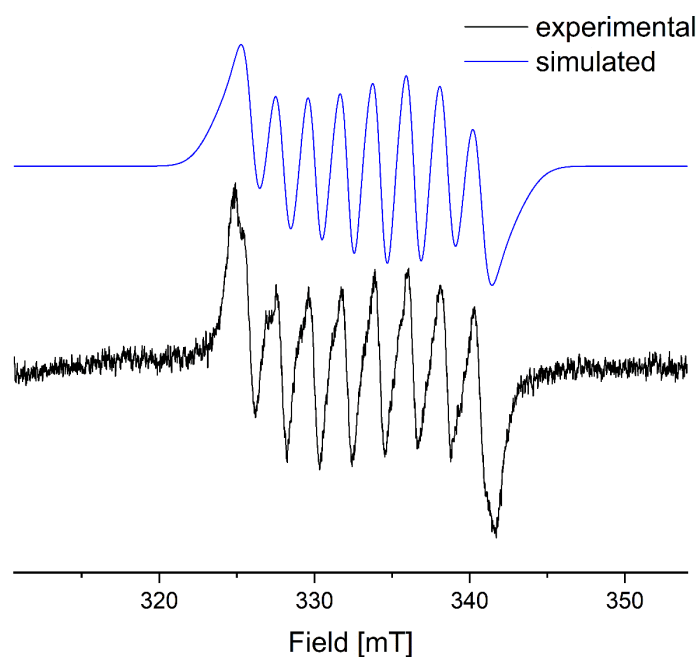

**Figure S8:** EPR spectra of **12** in CH<sub>2</sub>Cl<sub>2</sub> solution at r.t. (experimental (black) and simulated (blue)). Parameters for the fitting:  $g_1 = 2.023$ ,  $g_2 = 2.031$ ,  $g_3 = 2.014$ ,  $A_1^{Co} = 59.5577$ ,  $A_2^{Co} = 63.9666$ ,  $A_3^{Co} = 62.8305$ .

The simulation has been performed with the EasySpin program.<sup>[1]</sup>  
SysCo.S = 7/2;  
SysCo.g = [ 2.02342 2.03139 2.04128];  
SysCo.lw = [ 0.109269 ];  
SysCo.A = [ 59.5577 63.9666 62.8305];  
SysCo.HStrain = [ 26.6589 40.3355 49.2673 ];  
SysCo.AStrain = [ 0.320737 21.6238 21.0745 ];

Exp.mwFreq = 9.440920;  
Exp.Range = [303.6680 363.6840];  
Exp.nPoints = 4096;  
Exp.Temperature = 293;  
Exp.ModAmp = 0.05;



## 1.6 $[(\text{Cp}''\text{Co})(\text{Cp}'''\text{Ni})(\mu, \eta^3: \eta^3\text{-As}_3)][\text{FAI}]$ (13)

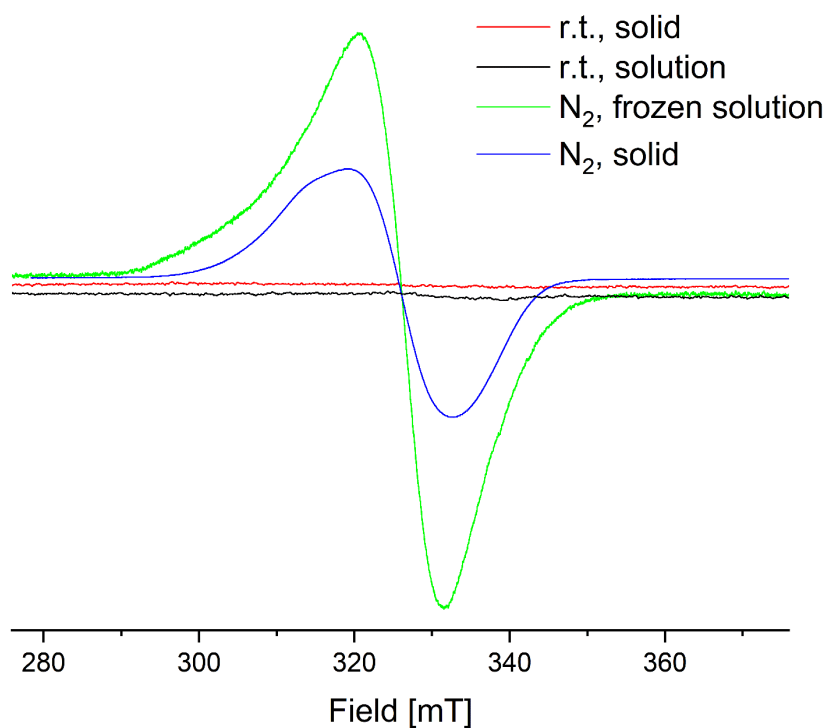

**Figure S9:** EPR spectra of **13** in solid state (r.t. (red), liquid nitrogen (blue) and in  $\text{CH}_2\text{Cl}_2$  solution (r.t. (black), frozen solution in liquid nitrogen (green)).

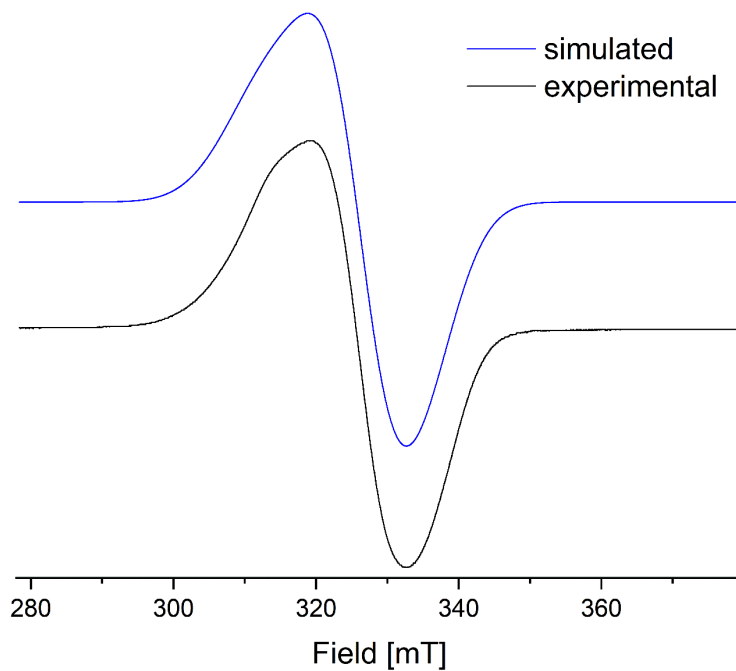

**Figure S10:** EPR spectra of **13** in solid state at 77 K (experimental (black) and simulated (blue)). Parameters for the fitting:  $g_1 = 2.155$ ,  $g_2 = 2.071$ ,  $g_3 = 2.016$ .

The simulation has been performed with the EasySpin program.<sup>[1]</sup>  
Sys.S = 1/2;  
Sys.g = [ 2.15539 2.07055 2.01631];  
SysCo.lw = [ 10 ];  
Sys.HStrain = [ 330.7 76.5 202.5 ];

Exp.mwFreq = 9.440920;  
Exp.Range = [278.3980 379.2020];  
Exp.nPoints = 4096;  
Exp.Temperature = 77;  
Exp.ModAmp = 0.05;

## 1.7 [(Cp''Co)(Cp''Ni)( $\mu,\eta^3:\eta^3:\eta^1$ -P<sub>3</sub>){W(CO)<sub>5</sub>}] [FAI] (21)

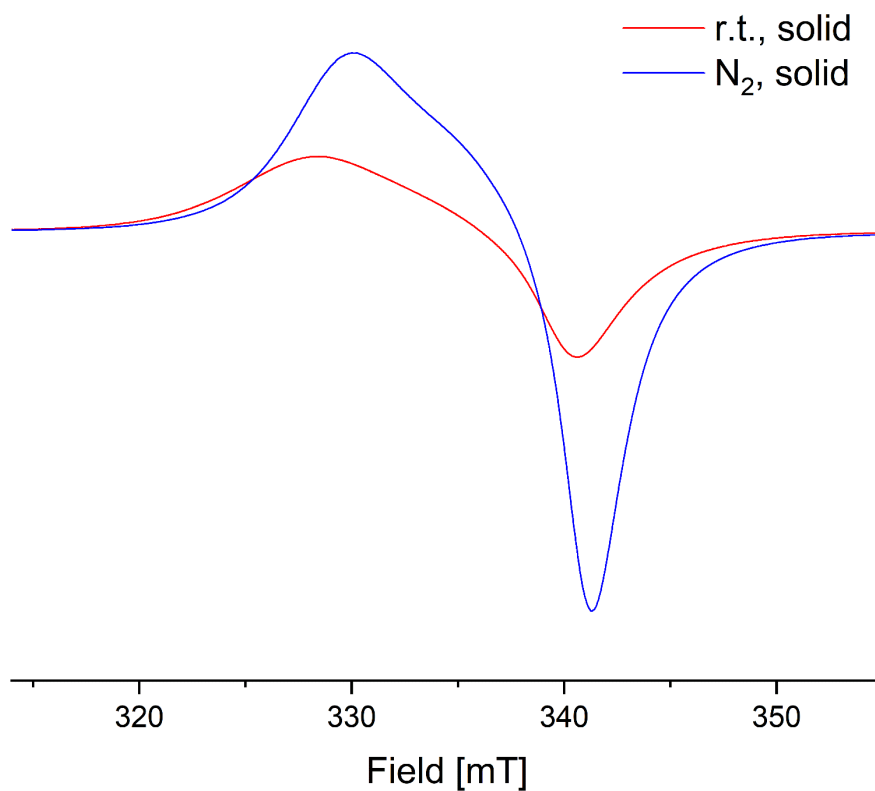

**Figure S11:** EPR spectra of **7** in solid state (r.t. (red), liquid nitrogen (blue)).

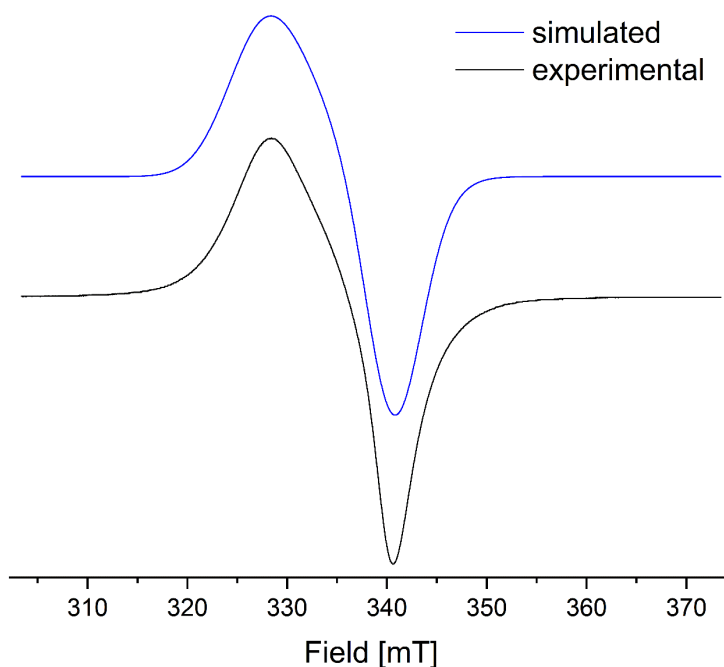

**Figure S12:** EPR spectra of **7** in solid state at 77 K (experimental (black) and simulated (blue)). Parameters for the fitting:  $g_1 = 2.060$ ,  $g_2 = 2.007$ ,  $g_3 = 1.984$ .

The simulation has been performed with the EasySpin program.<sup>11</sup>  
Sys.S = 1/2;  
Sys.g = [ 2.060 2.0066 1.984];  
SysCo.lw = [ 5];  
Sys.HStrain = [ 190 280 90];

Exp.mwFreq = 9.440920;  
Exp.Range = [303.3835 373.4645];  
Exp.nPoints = 4096;  
Exp.Temperature = 77;  
Exp.ModAmp = 0.05;

## 1.8 [K(2,2,2-crypt)][(Cp<sup>''</sup>Co)(Cp<sup>''</sup>Ni)( $\mu,\eta^3:\eta^3$ -P<sub>3</sub>)]

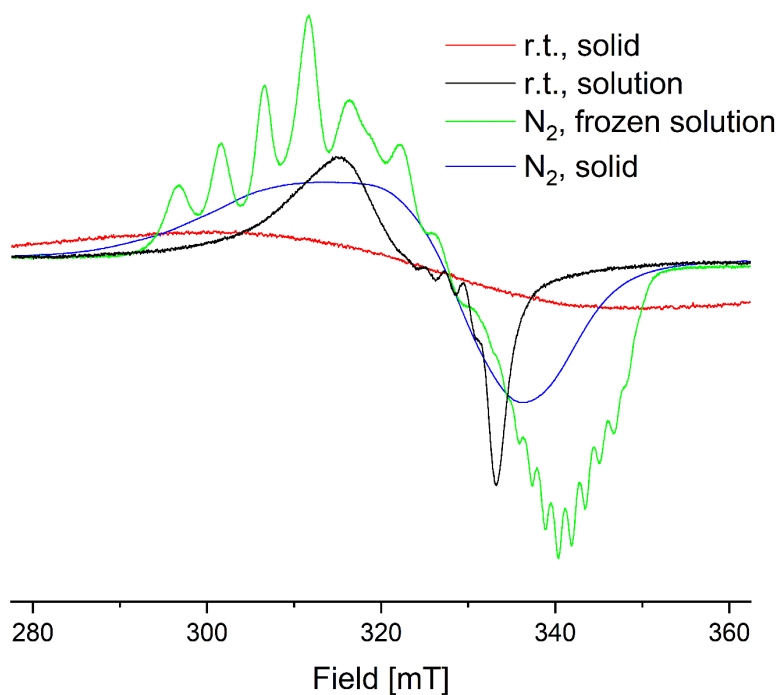

**Figure S13:** EPR spectra of **22** in solid state (r.t. (green), liquid nitrogen (blue)) and in thf solution (r.t. (black), frozen solution in liquid nitrogen (green)).

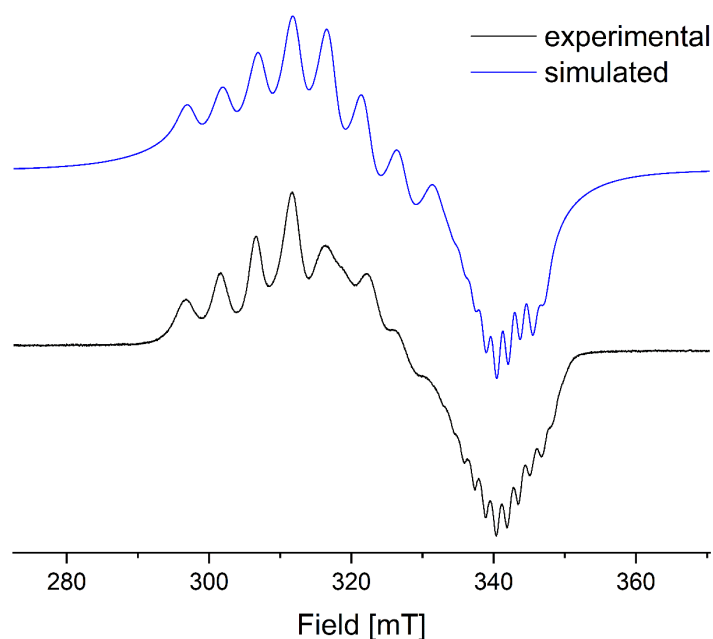

**Figure S14:** EPR spectra of **22** (crypt) in frozen thf solution at 77 K (experimental (black) and simulated (blue)). Parameters for the fitting:  $g_1 = 2.143$ ,  $g_2 = 2.120$ ,  $g_3 = 1.980$ ,  $A_1^{Co} = 148.53$ ,  $A_2^{Co} = 50.32$ ,  $A_3^{Co} = 42.72$ ,  $A_1^P = 13.63$ ,  $A_2^P = 35.94$ ,  $A_3^P = 42.13$  MHz.

The simulation has been performed with the EasySpin program.<sup>11</sup>  
 SysCo.Nucs = [Co,P];  
 SysCo.g = [ 2.14301 2.1201 1.98022];  
 SysCo.lw = [ 1 ];  
 SysCo.A = [ 148.53 50.32 42.72; 13.63 35.94 42.13];  
 SysCo.HStrain = [50.13 500.92 15.21];  
 SysCo.AStrain = [ 1.13 389.27 2.16];

Exp.mwFreq = 9.440920;  
 Exp.Range = [268.7840 388.8160];  
 Exp.nPoints = 4096;  
 Exp.Temperature = 77;  
 Exp.ModAmp = 0.05;

## 1.9 [K(2,2,2-crypt)][(Cp<sup>''</sup>Co)(Cp<sup>''</sup>Ni)( $\mu,\eta^3:\eta^3$ -As<sub>3</sub>)] (23)

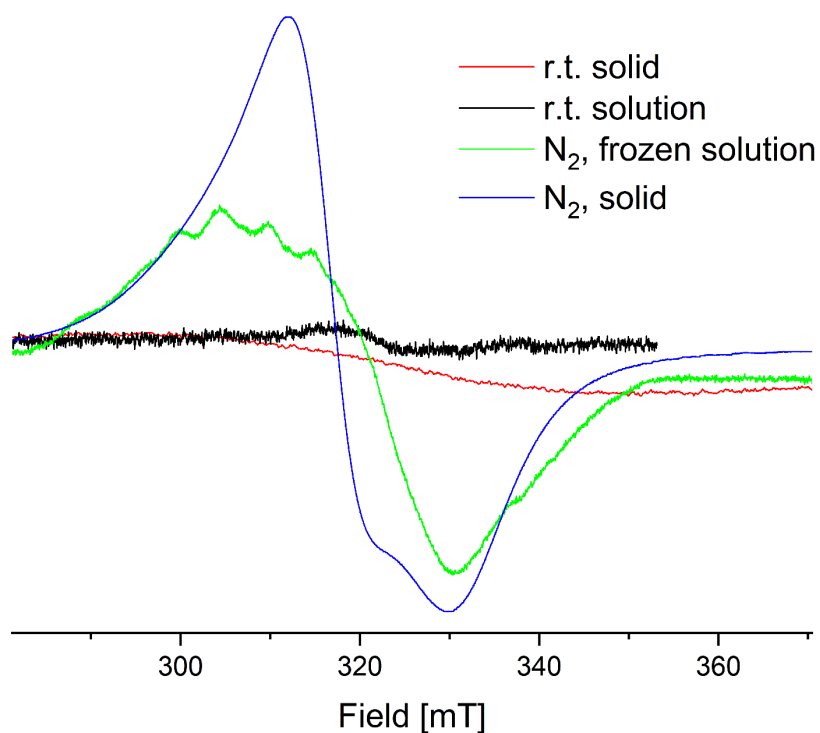

**Figure S15:** EPR spectra of **23** in solid state (r.t. (green), liquid nitrogen (blue)) and in thf solution (r.t. (black), frozen solution in liquid nitrogen (green)).

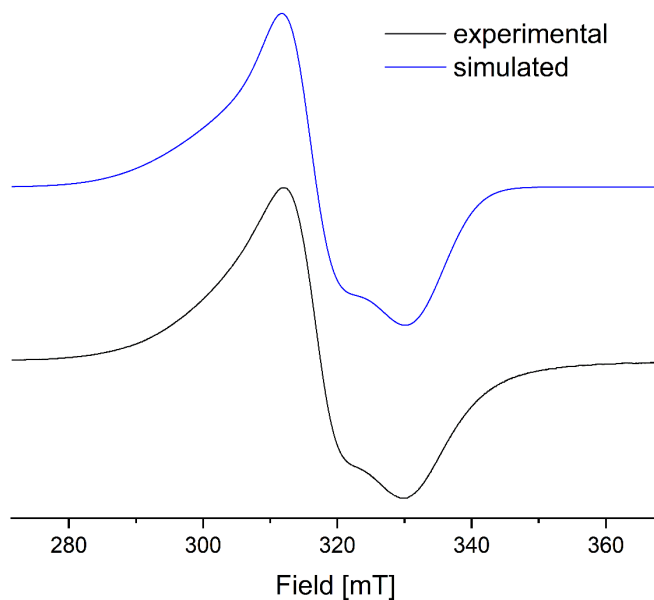

**Figure S16:** EPR spectra of **23** solid at 77 K (experimental (black) and simulated (blue)). Parameters for the fitting:  $g_1 = 2.214$   $g_2 = 2.142$ ,  $g_3 = 2.039$ .

The simulation has been performed with the EasySpin program.<sup>[1]</sup>  
 Sys.S = 1/2;  
 Sys.g = [ 2.214 2.142 2.039];  
 Sys.lw = [ 3];  
 Sys.HStrain = [800 190 300];

Exp.mwFreq = 9.440920;  
 Exp.Range = [269.6695 370.4745];  
 Exp.nPoints = 4096;  
 Exp.Temperature = 77;  
 Exp.ModAmp = 0.05;

## 2. NMR spectroscopic investigations

### 2.1 $[(\text{Cp}^*\text{Fe})(\text{Cp}''\text{Co})(\mu, \eta^5: \eta^5\text{-P}_5)][\text{FAl}]$ (**3**)

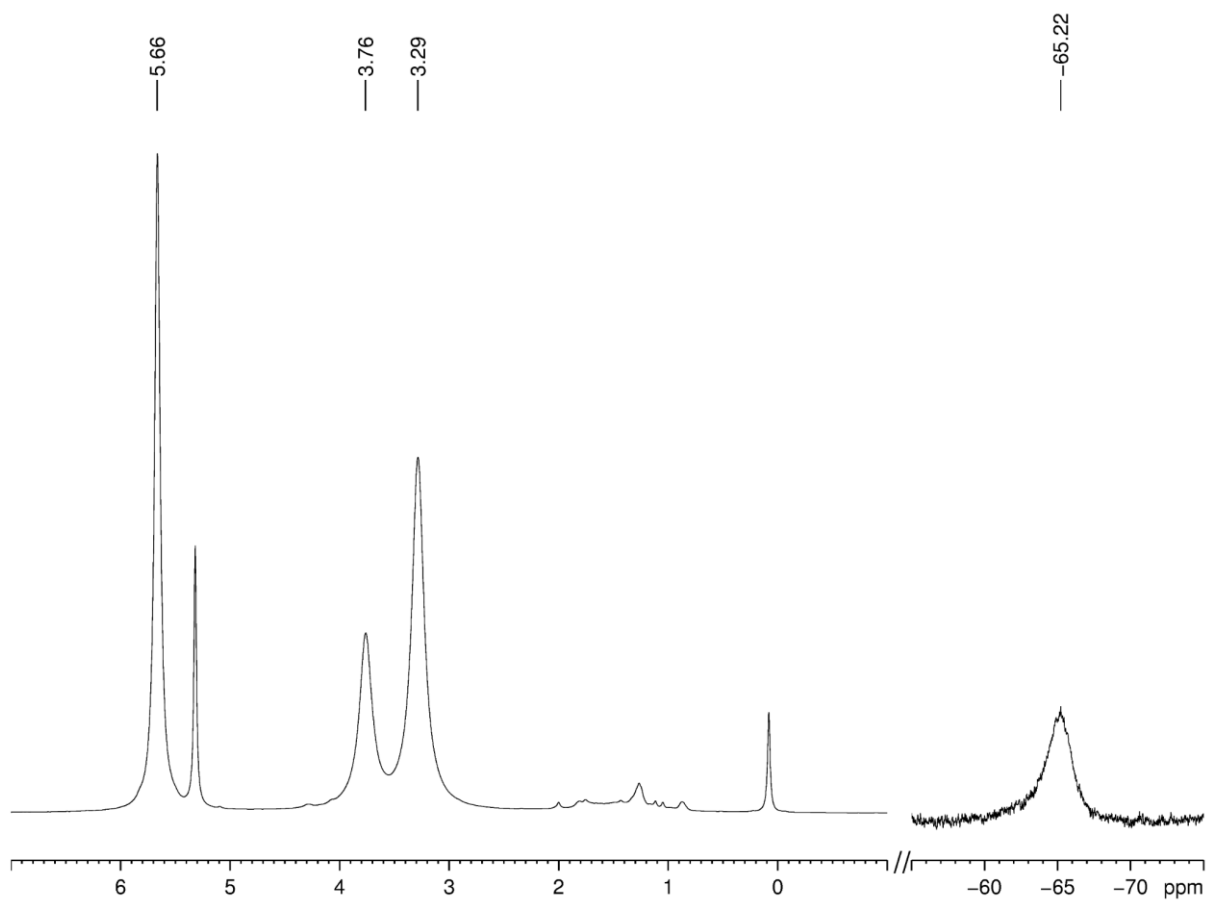

**Figure S17:**  $^1\text{H}$  NMR spectrum of **3** in  $\text{CD}_2\text{Cl}_2$ .

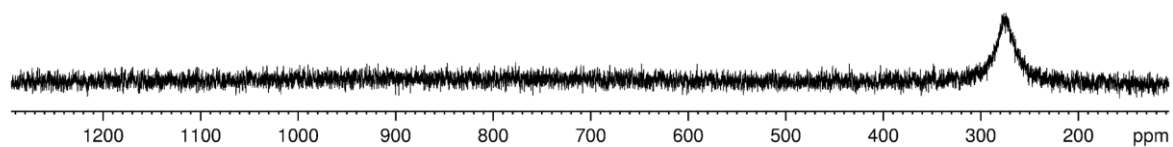

**Figure S18:**  $^1\text{H}$  NMR spectrum of **3** in  $\text{CD}_2\text{Cl}_2$ .

## 2.2 [(Cp\*Fe)(Cp\*\*Co)( $\mu,\eta^5:\eta^5$ -As<sub>5</sub>)] [FAI] (4)

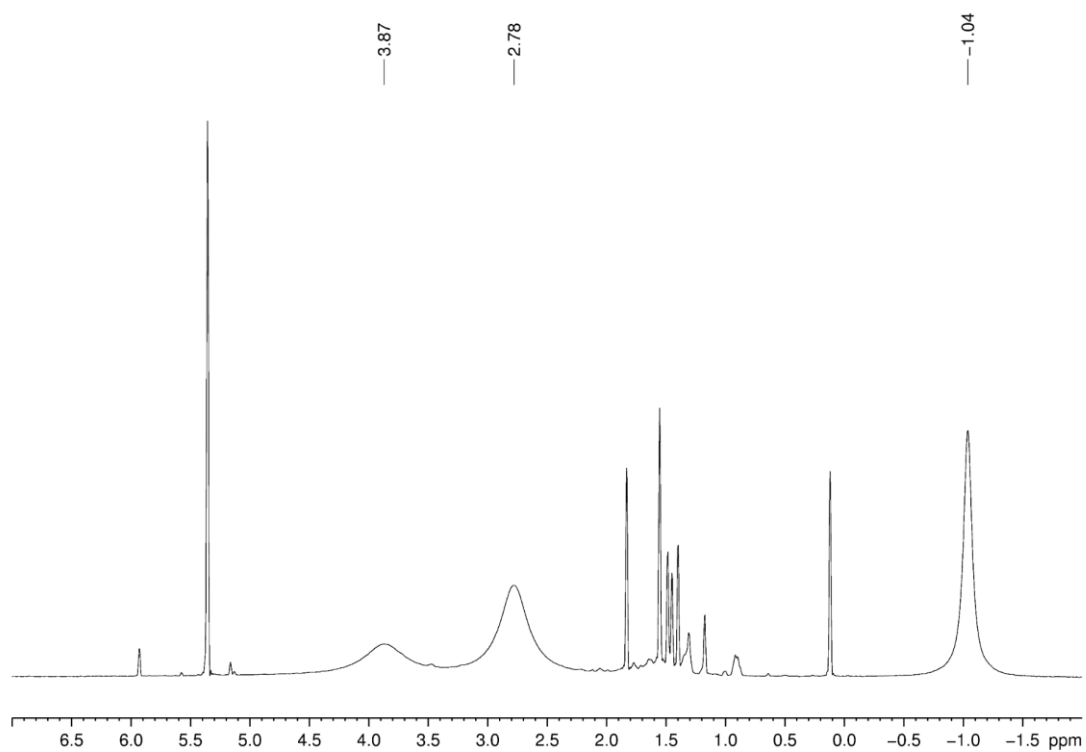

**Figure S19:** <sup>1</sup>H NMR spectrum of 4 in CD<sub>2</sub>Cl<sub>2</sub>.

## 2.3 [(Cp\*Fe)(Cp'''Co)(μ,η<sup>5</sup>:η<sup>5</sup>-P<sub>5</sub>)] [FAl]<sub>2</sub> (5)

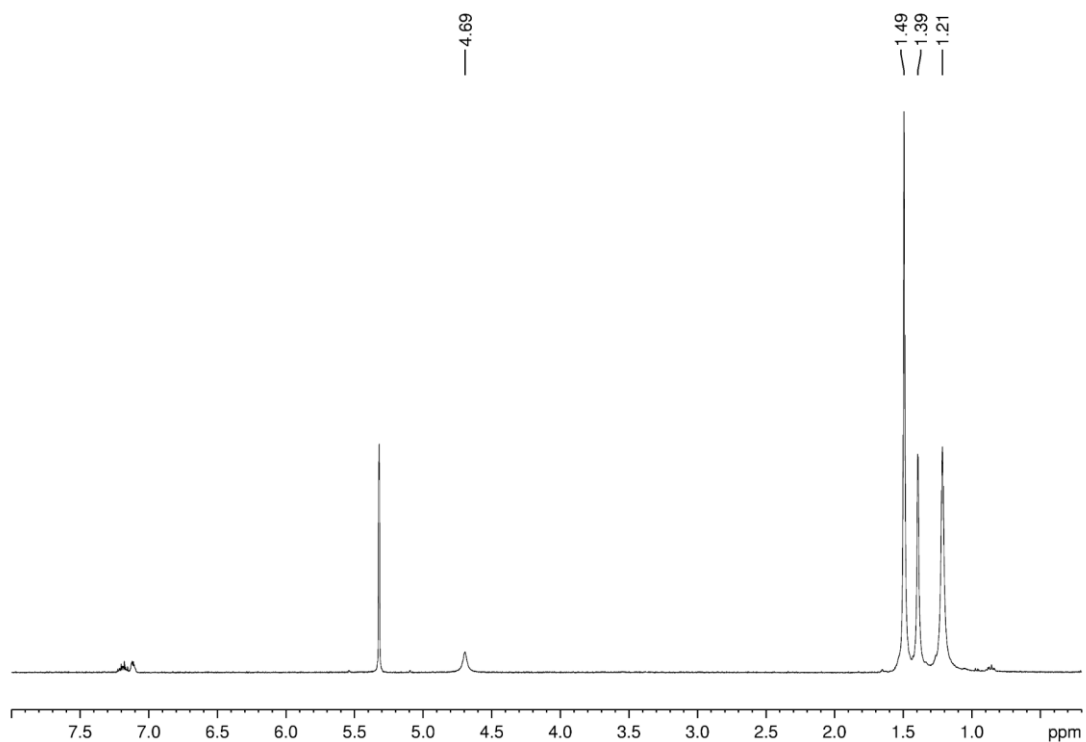

Figure S20: <sup>1</sup>H NMR spectrum of **5** in CD<sub>2</sub>Cl<sub>2</sub>.

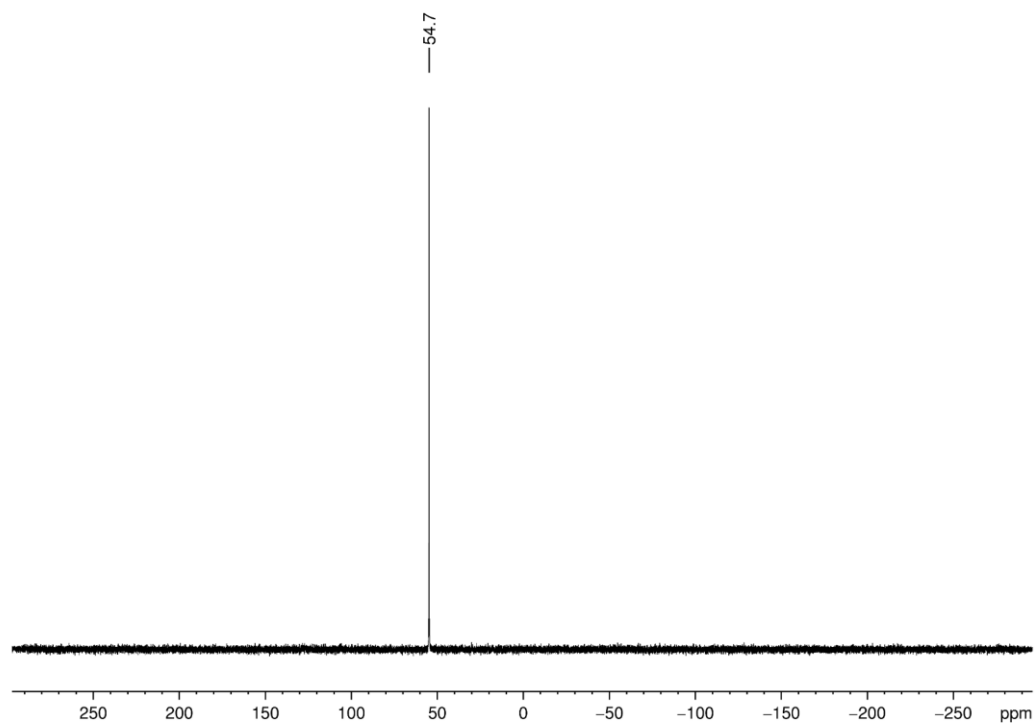

Figure S21: <sup>31</sup>P{<sup>1</sup>H} NMR spectrum of **5** in CD<sub>2</sub>Cl<sub>2</sub>.

## 2.4 $[(\text{Cp}^*\text{Fe})(\text{Cp}'''\text{Co})(\mu, \eta^5: \eta^5\text{-As}_5)][\text{FAl}]_2$ (**6**)

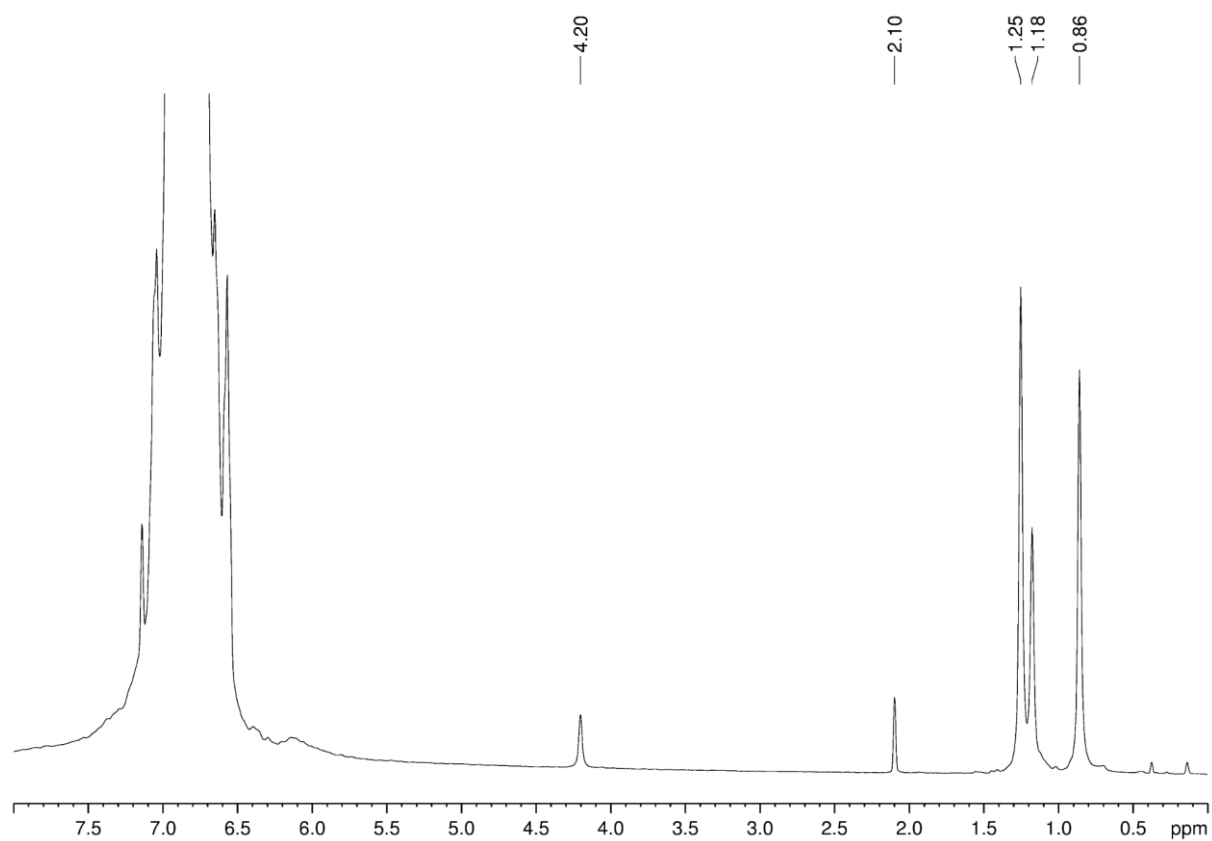

**Figure S22:**  $^1\text{H}$  NMR spectrum of **6** in  $o\text{-C}_6\text{H}_4\text{F}_2$  with  $\text{C}_6\text{D}_6$  capillary.



## 2.5 [K(2,2,2-crypt)][(Cp\*Fe)(Cp'''Co)( $\mu,\eta^5:\eta^5$ -P<sub>5</sub>)] (7)

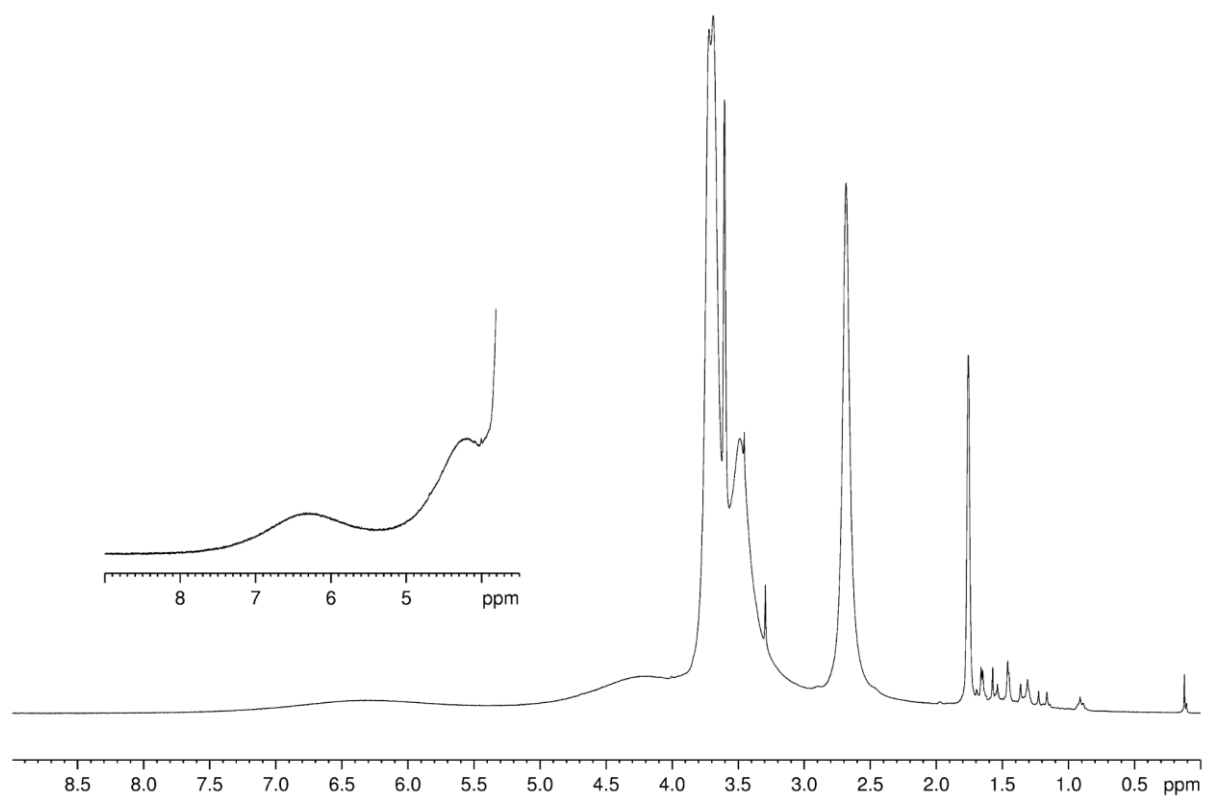

**Figure S23:** <sup>1</sup>H NMR spectrum of 7 in thf-d<sub>8</sub>.

## 2.6 [(Cp\*Fe)(Cp'''Co)(μ,η<sup>5</sup>:η<sup>5</sup>-As<sub>5</sub>)] (2) + KC<sub>8</sub>/2,2,2-cryptand

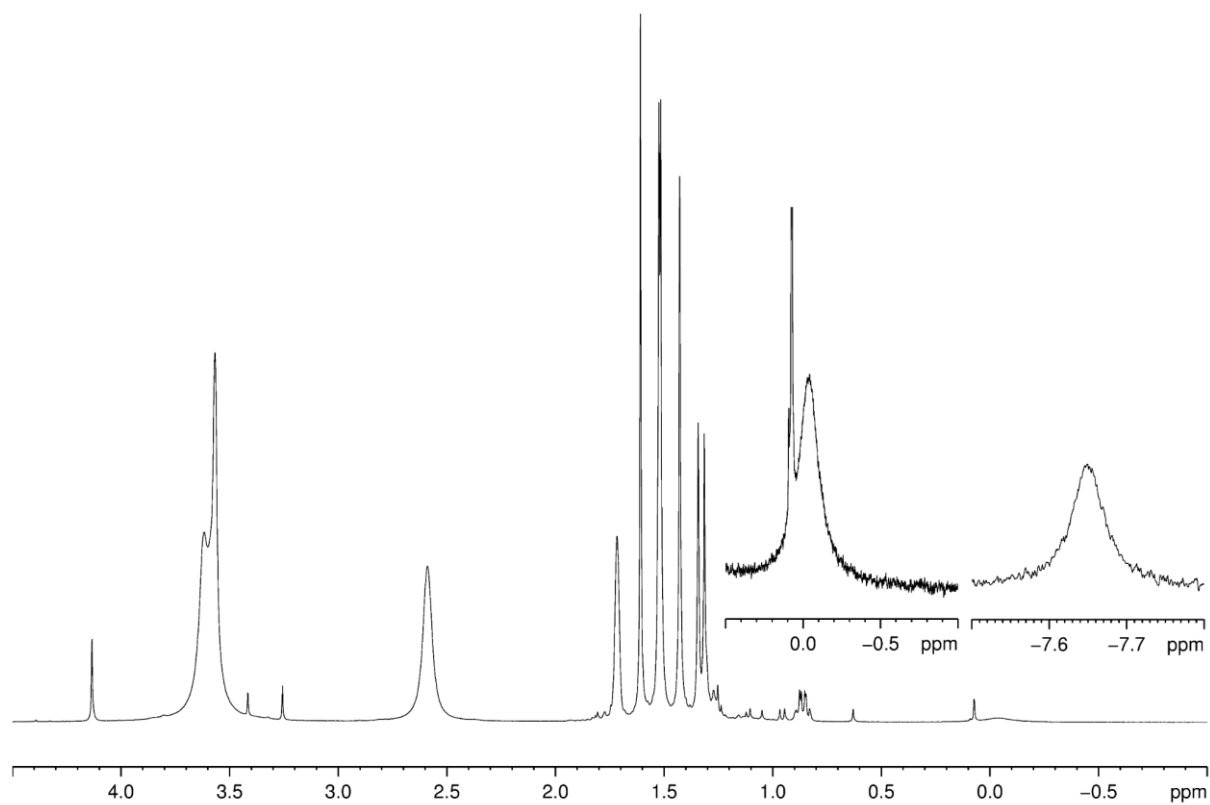

**Figure S24:** <sup>1</sup>H NMR spectrum of the reaction of **2** with KC<sub>8</sub> in the presence of 2,2,2-cryptand in thf-d<sub>8</sub>.

## 2.7 [K(2,2,2-crypt)][(Cp\*Fe)(Cp'''Co)( $\mu,\eta^4:\eta^4$ -As<sub>6</sub>)] (9)

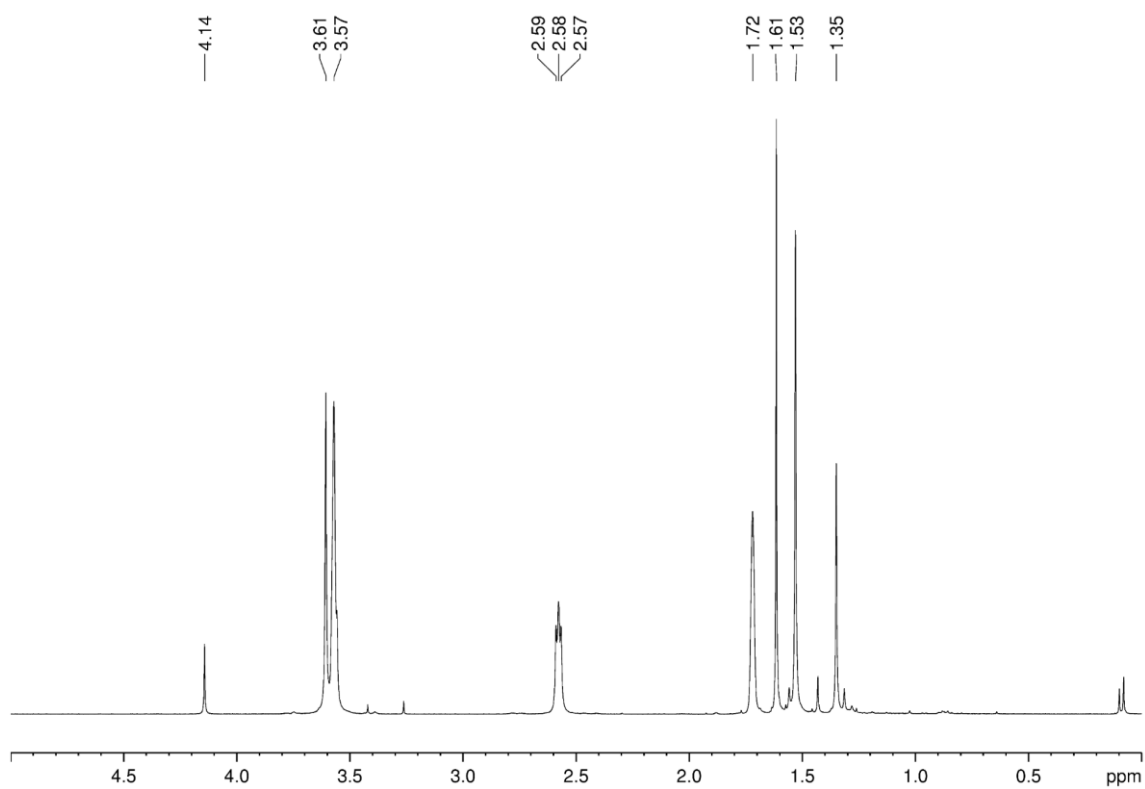

Figure S25: <sup>1</sup>H NMR spectrum of 9 in thf-d<sub>8</sub>.

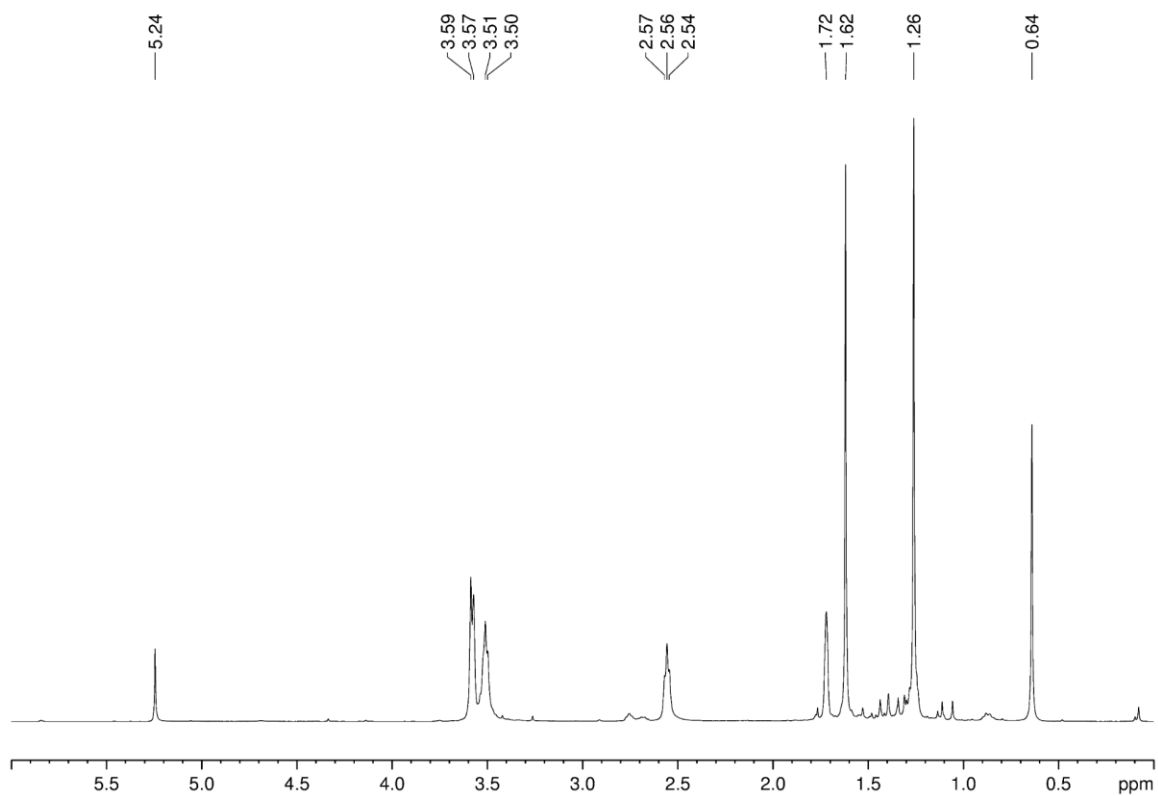

Figure S26: <sup>1</sup>H NMR spectrum of the mother liquor of the crystallization of 9 in thf-d<sub>8</sub>.

## 2.8 Reaction of $[(\text{Cp}^{\prime\prime}\text{Co})(\text{Cp}^{\prime\prime}\text{Ni})(\mu, \eta^3: \eta^3\text{-P}_3)]$ (**10**) with $\text{Ag}[\text{FAI}]$

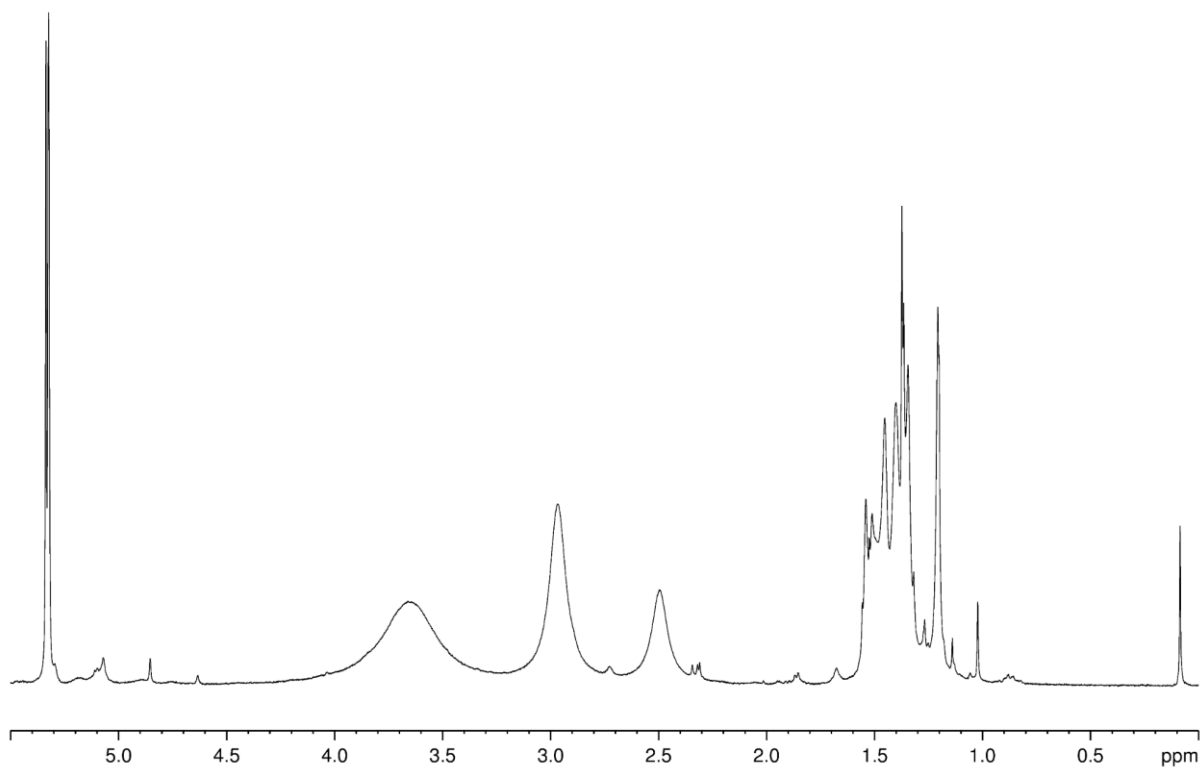

**Figure S27:**  $^1\text{H}$  NMR of the reaction of **10** with  $\text{Ag}[\text{FAI}]$  in  $\text{CD}_2\text{Cl}_2$  after one hour.

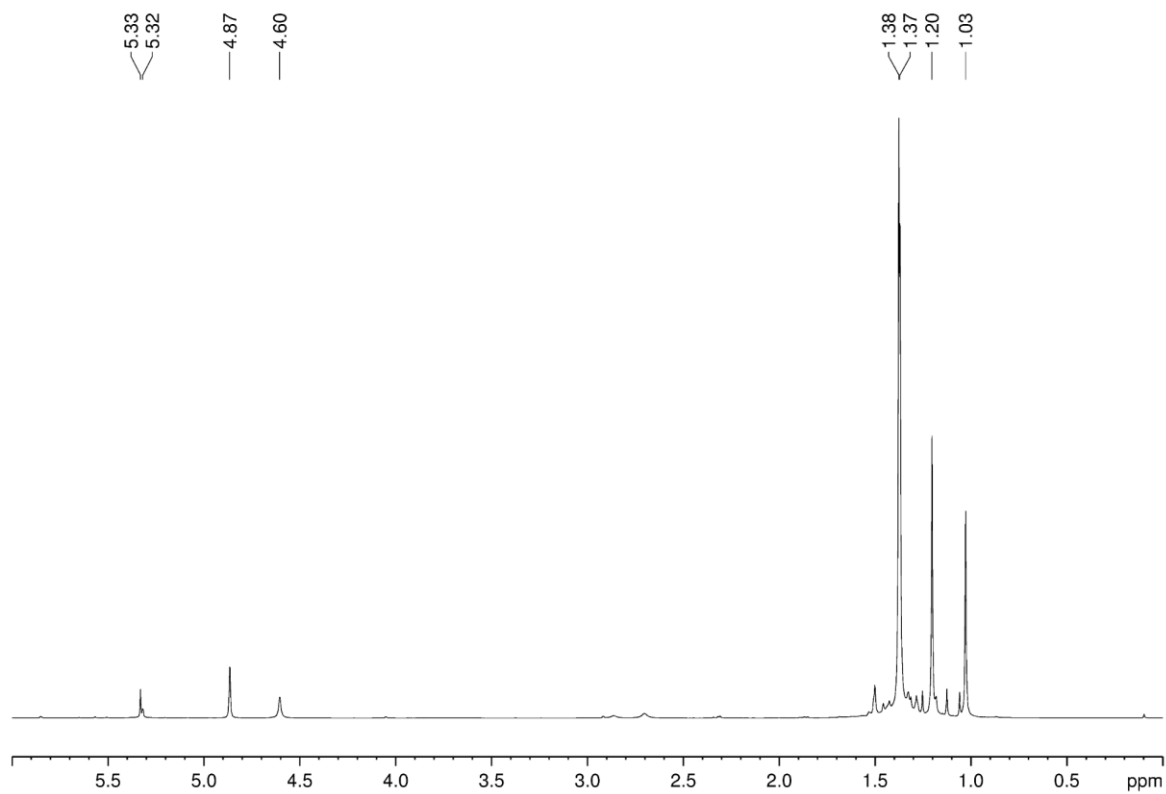

**Figure S28:**  $^1\text{H}$  NMR of the reaction of **10** with  $\text{Ag}[\text{FAI}]$  in  $\text{CD}_2\text{Cl}_2$  after one day.

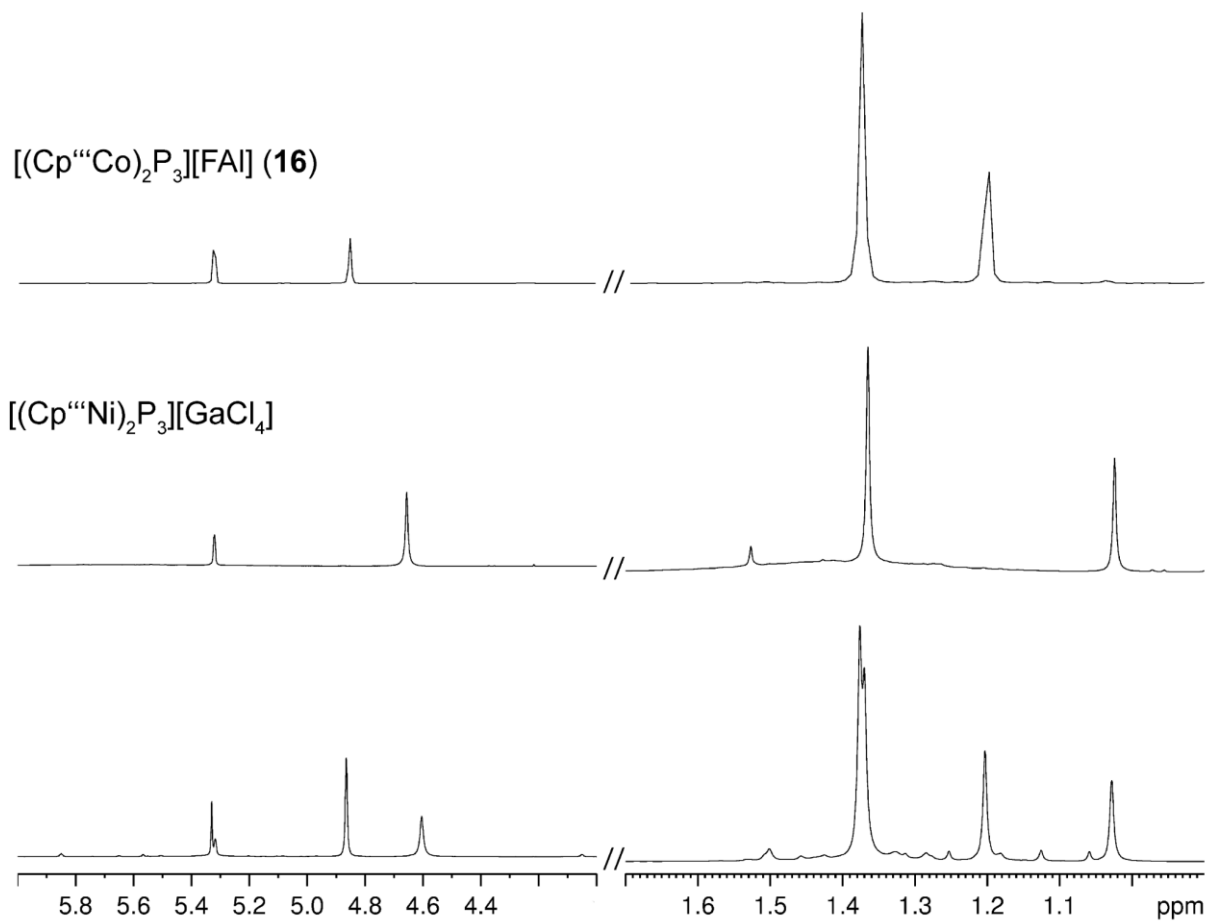

**Figure S29:**  $^1H$  NMR of the reaction of **10** with  $Ag[FAl]$  in  $CD_2Cl_2$  after one day and the spectra of isolated  $[(Cp^{III}Co)_2P_3][FAl]$  (**16**) and  $[(Cp^{III}Ni)_2P_3][GaCl_4]$  (as reference for **14**).<sup>[2]</sup>

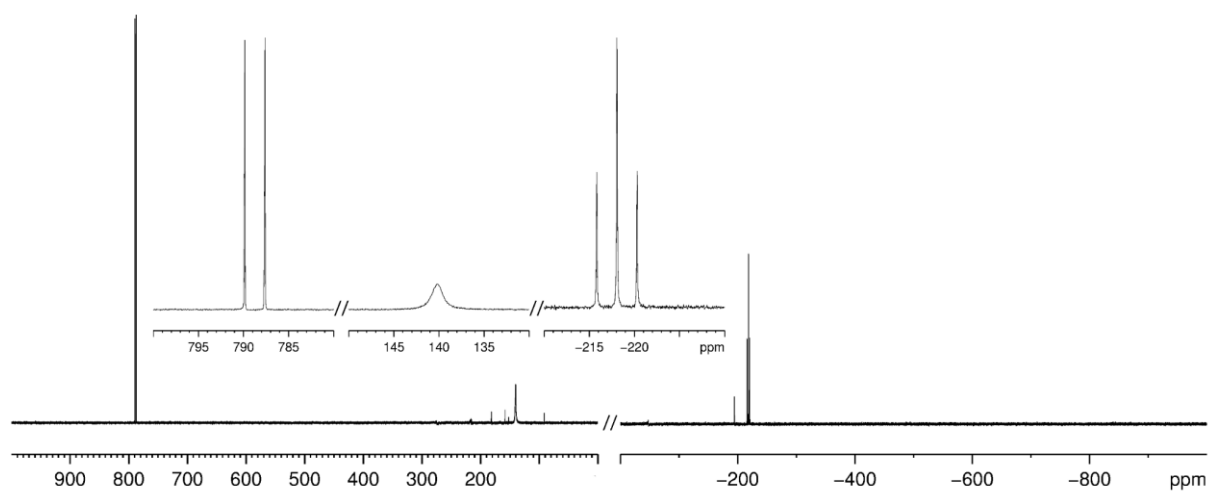

**Figure S30:**  $^{31}P\{^1H\}$  NMR of the reaction of **10** with  $Ag[FAl]$  in  $CD_2Cl_2$  after one day.

## 2.9 $[(\text{Cp}''\text{Co})_2(\mu, \eta^3: \eta^3\text{-P}_3)][\text{FAI}]$ (16)

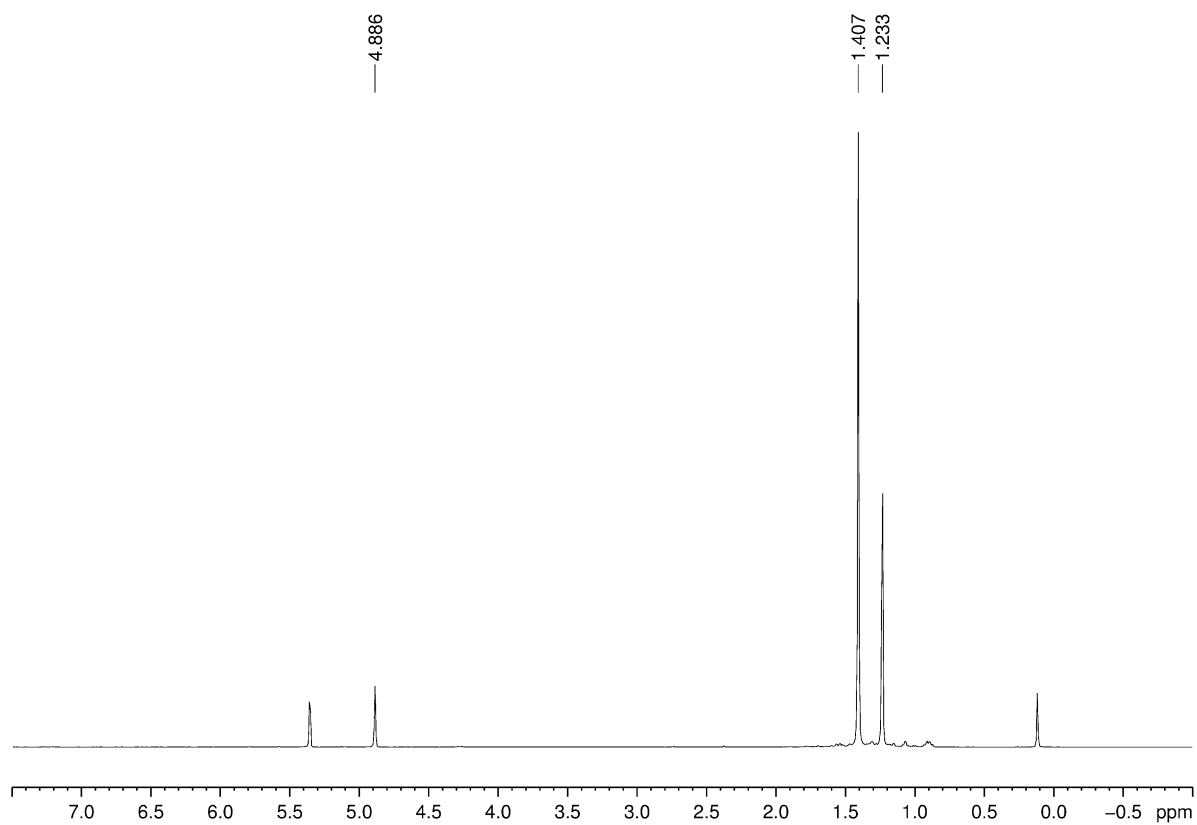

Figure S31:  $^1\text{H}$  NMR of **16** in  $\text{CD}_2\text{Cl}_2$ .

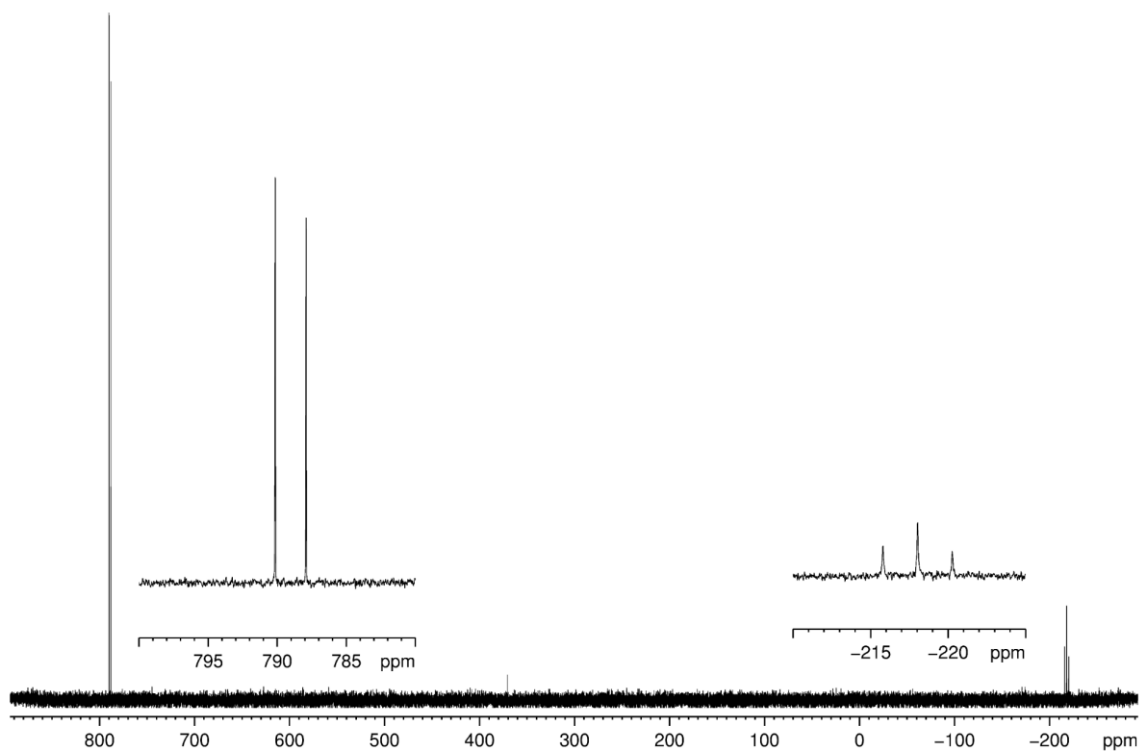

Figure S32:  $^{31}\text{P}\{^1\text{H}\}$  NMR of **16** in  $\text{CD}_2\text{Cl}_2$ .

## 2.10 Reaction of $[(\text{Cp}'''\text{Co})(\text{Cp}'''\text{Ni})(\mu,\eta^3:\eta^3\text{-As}_3)]$ (**11**) with $\text{Ag}[\text{FAI}]$

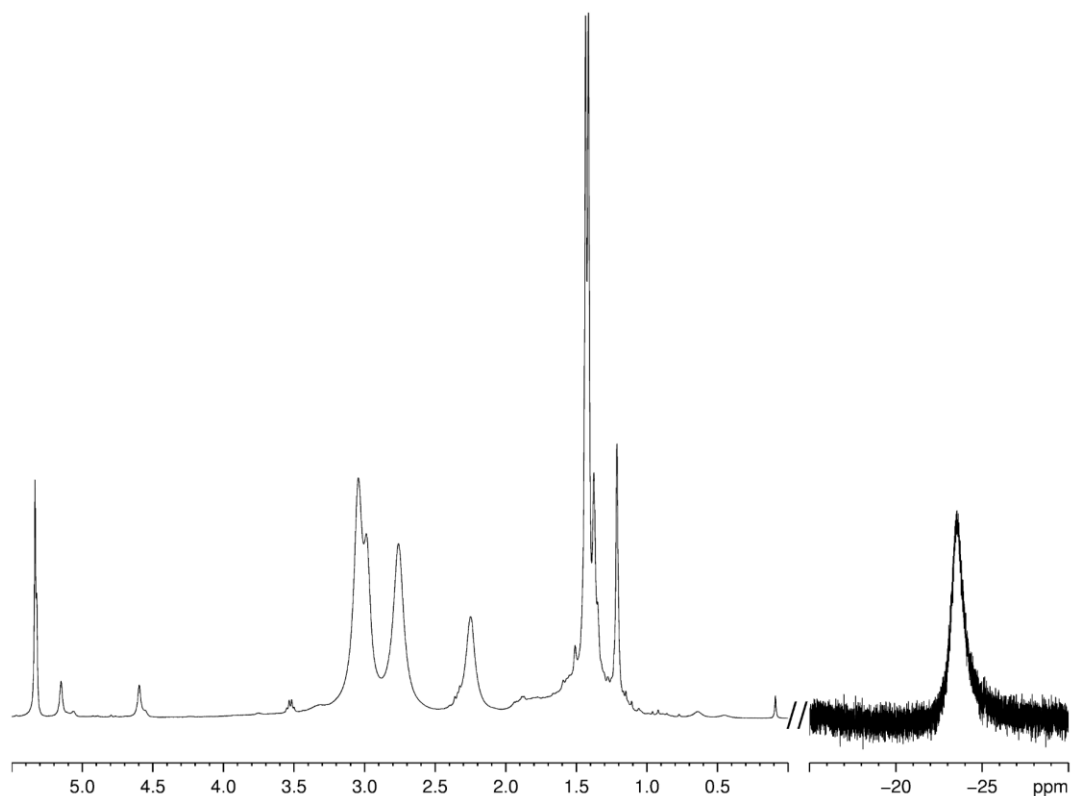

**Figure S33:**  $^1\text{H}$  NMR of the reaction of **11** with  $\text{Ag}[\text{FAI}]$  in  $\text{CD}_2\text{Cl}_2$  after one hour.

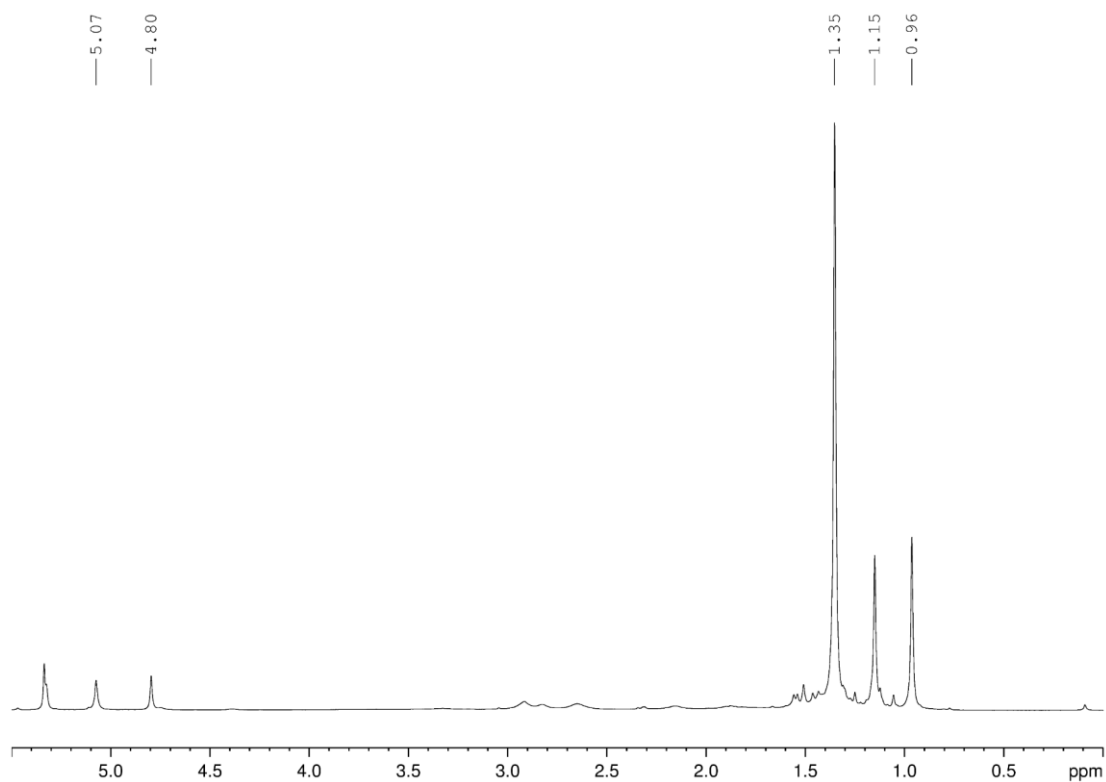

**Figure S34:**  $^1\text{H}$  NMR of the reaction of **11** with  $\text{Ag}[\text{FAI}]$  in  $\text{CD}_2\text{Cl}_2$  after one day.

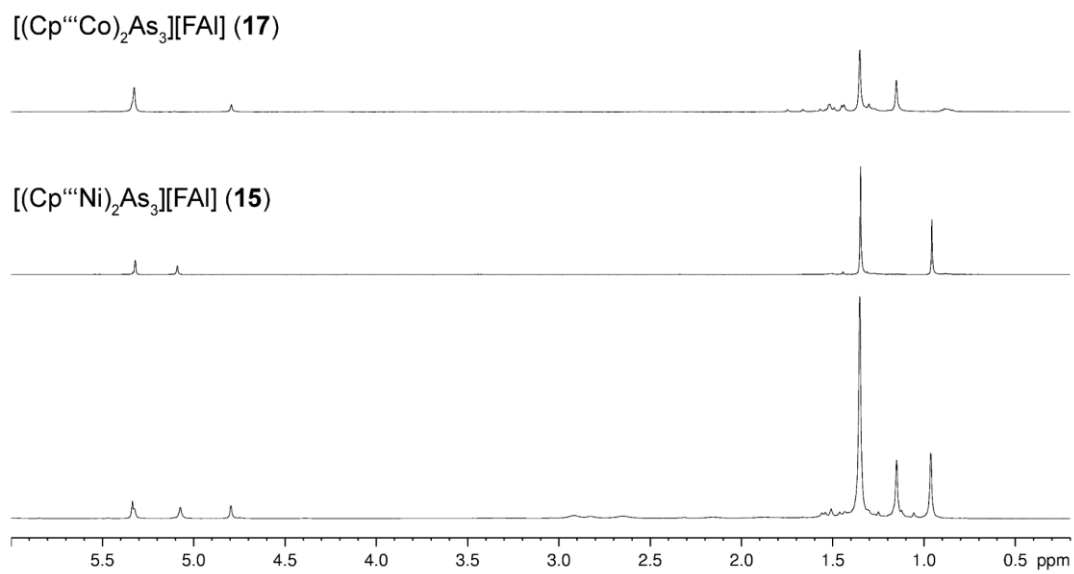

**Figure S35:**  $^1\text{H}$  NMR of the reaction of **11** with  $\text{Ag}[\text{FAI}]$  in  $\text{CD}_2\text{Cl}_2$  after one day and the spectra of isolated  $[(\text{Cp}^{\text{***}}\text{Co})_2\text{As}_3][\text{FAI}]$  (**17**) and  $[(\text{Cp}^{\text{***}}\text{Ni})_2\text{As}_3][\text{FAI}]$  (**15**).



## 2.11 $[(\text{Cp}'''\text{Ni})_2(\mu, \eta^3: \eta^3\text{-As}_3)][\text{FAl}]$ (**15**)

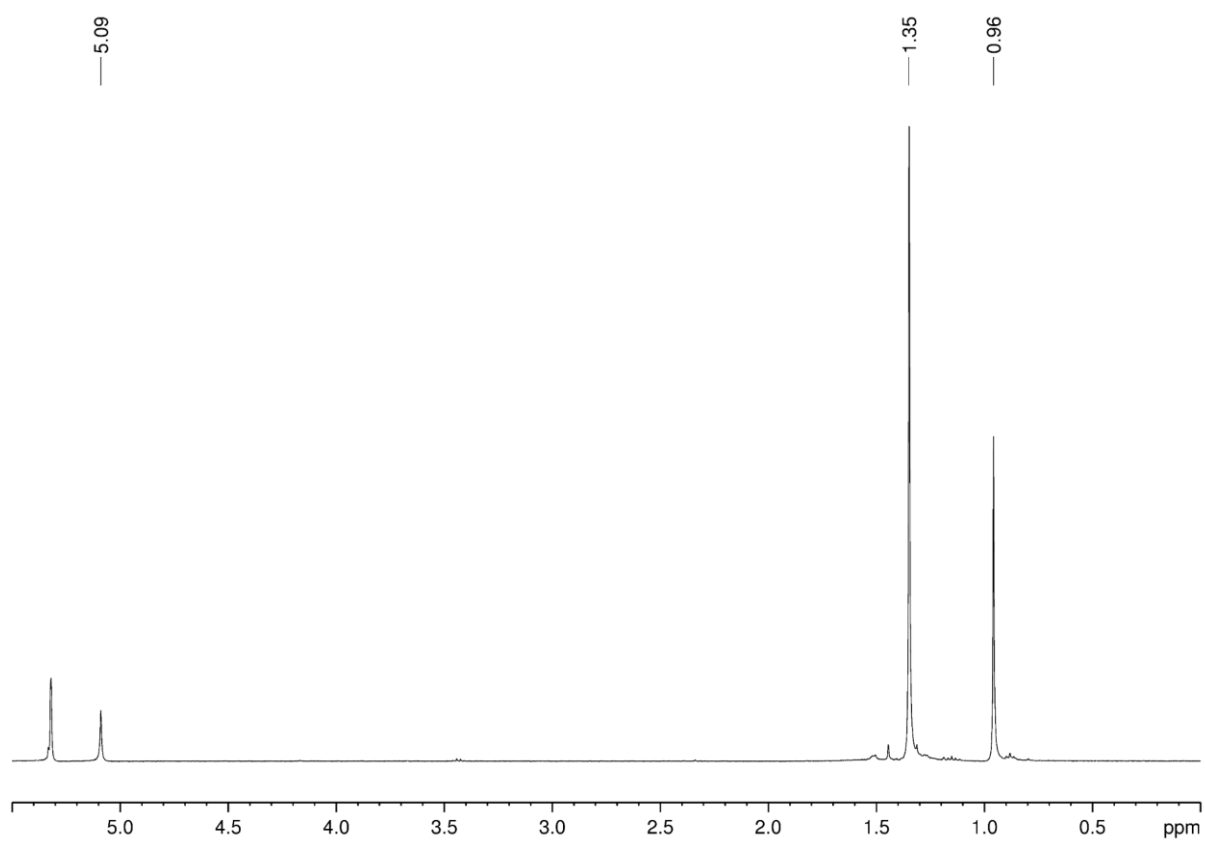

**Figure S36:**  $^1\text{H}$  NMR of **15** in  $\text{CD}_2\text{Cl}_2$ .

## 2.12 $[(Cp^{***}Co)_2(\mu,\eta^3:\eta^3-As_3)][FAI]$ (17)

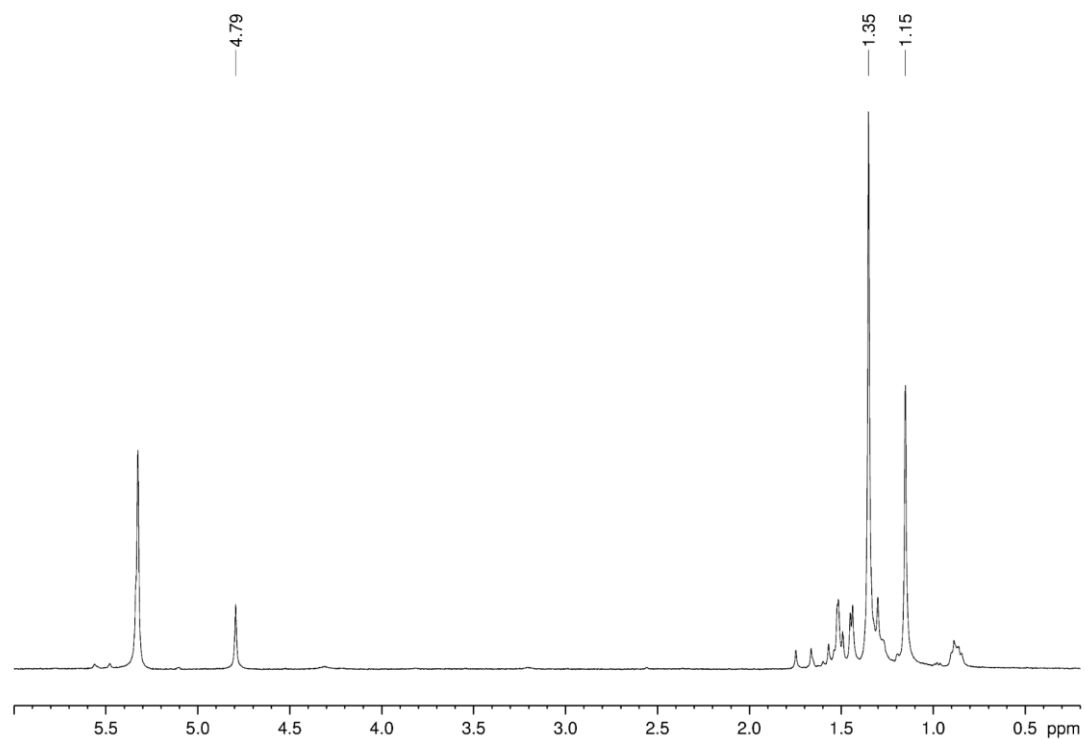

**Figure S37:**  $^1H$  NMR of 17 in  $CD_2Cl_2$ .

## 2.13 [(Cp''Co)(Cp''Ni)( $\mu,\eta^3:\eta^3$ -P<sub>3</sub>)] (18)

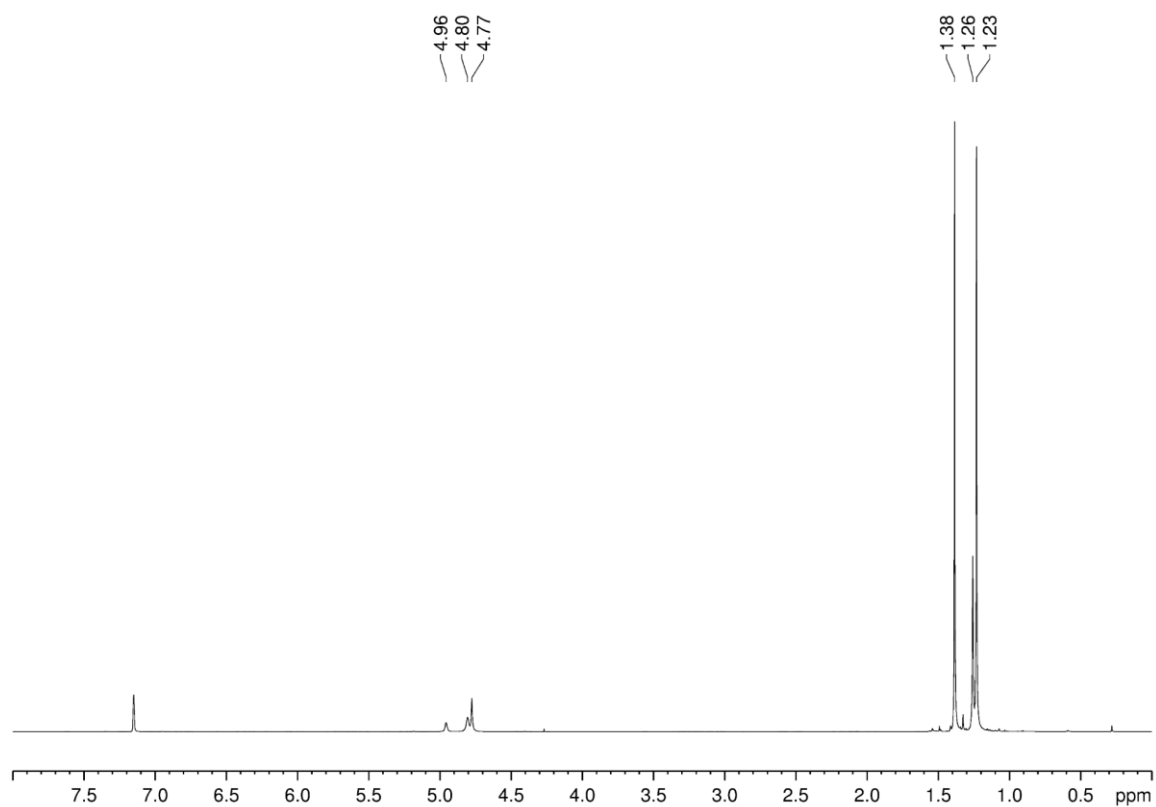

Figure S38: <sup>1</sup>H NMR of **18** in C<sub>6</sub>D<sub>6</sub>.

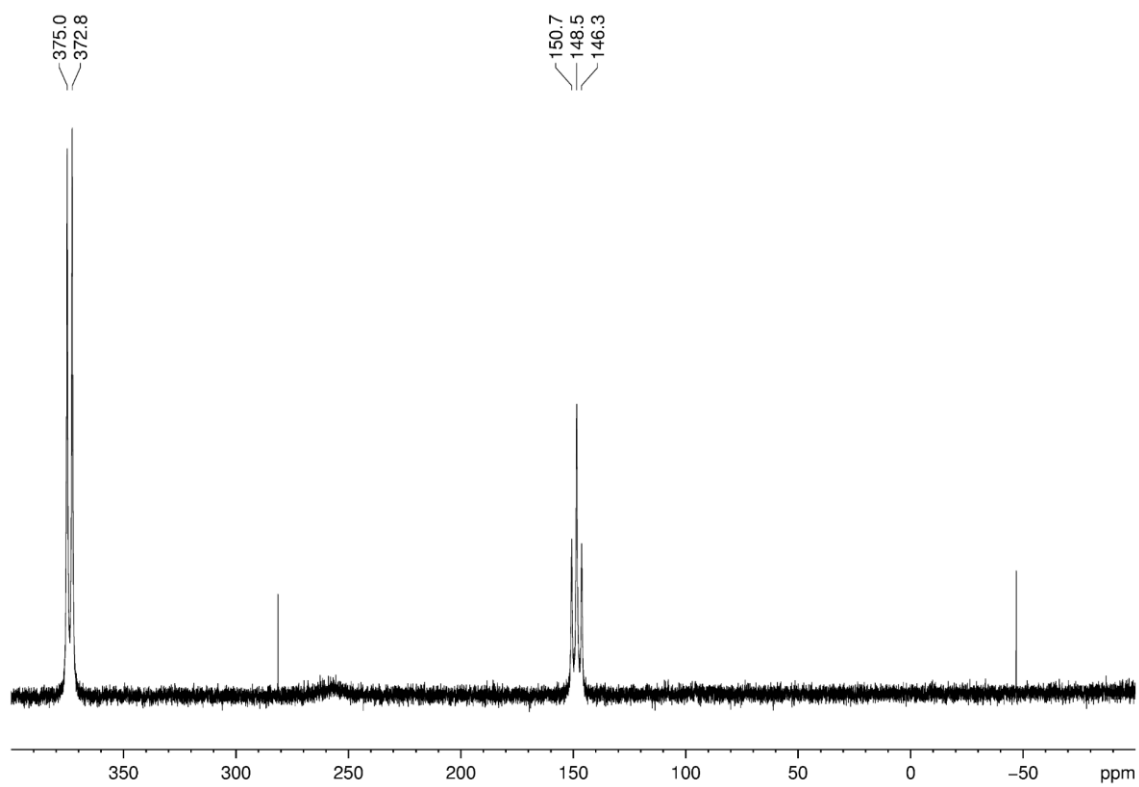

Figure S39: <sup>31</sup>P{<sup>1</sup>H} NMR of **18** in C<sub>6</sub>D<sub>6</sub>.

**2.14**  $[(\text{Cp}'''\text{Co})(\text{Cp}''\text{Ni})(\mu_4, \eta^3: \eta^2: \eta^1: \eta^1\text{-P}_3)\text{Ag}(\text{CH}_2\text{Cl}_2)]_2[\text{FAl}]_2$   
**(19)**

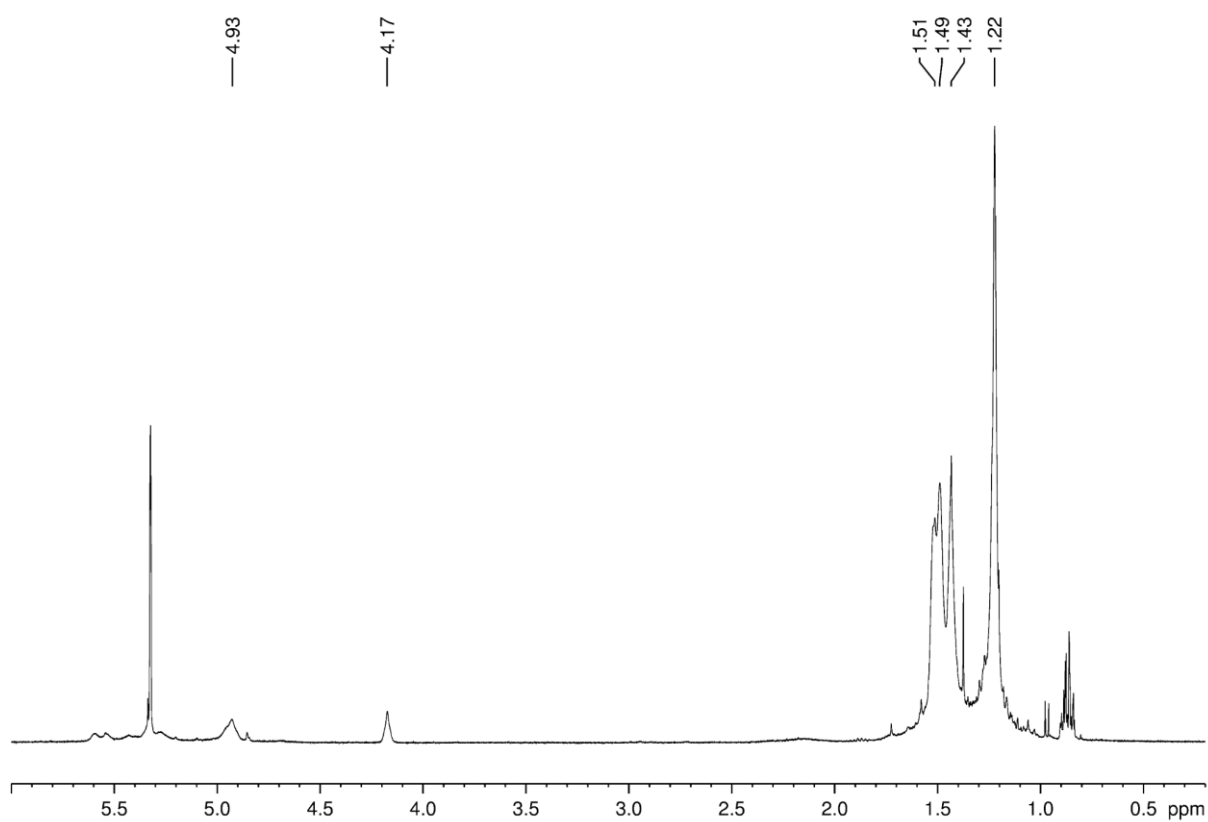

**Figure S40:**  $^1\text{H}$  NMR of **19** in  $\text{CD}_2\text{Cl}_2$ .

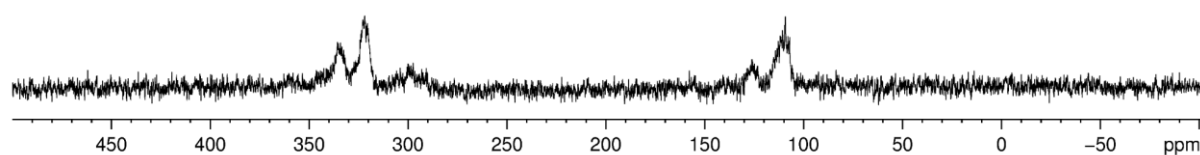

**Figure S41:**  $^{31}\text{P}\{^1\text{H}\}$  NMR of **19** in  $\text{CD}_2\text{Cl}_2$ .

## 2.15 $[(\text{Cp}^{\prime\prime}\text{Co})(\text{Cp}^{\prime\prime}\text{Ni})(\mu, \eta^3: \eta^3: \eta^1\text{-P}_3)\{\text{W}(\text{CO})_5\}][\text{FAI}]$ (21)

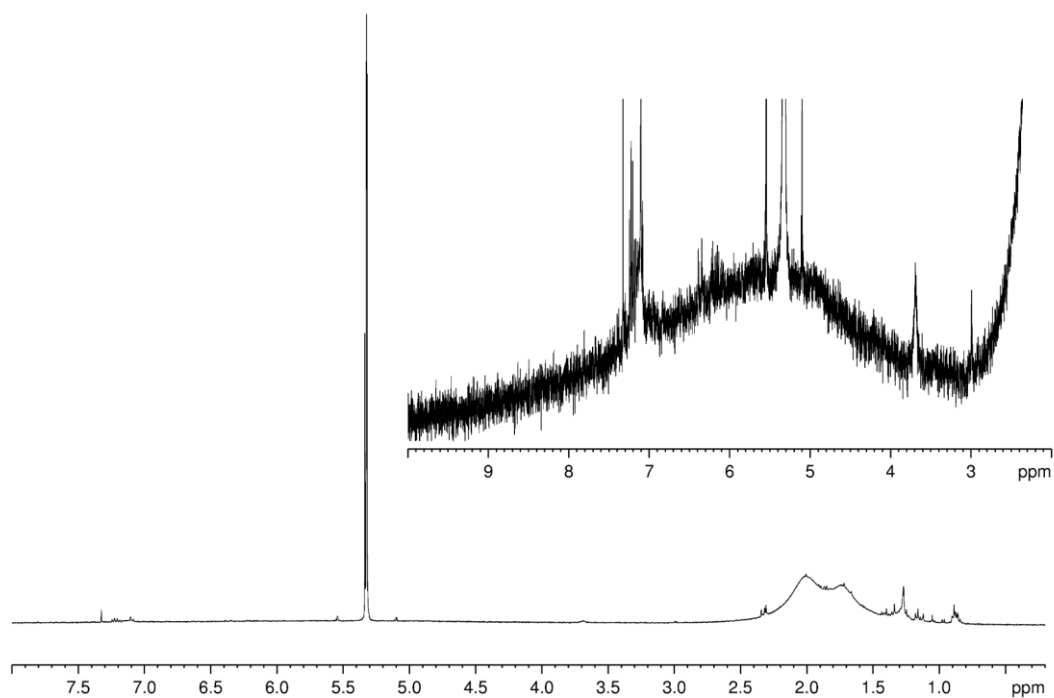

**Figure S42:**  $^1\text{H}$  NMR of the reaction of **20** with  $\text{Ag}[\text{FAI}]$  in  $\text{CD}_2\text{Cl}_2$  after 1 h.

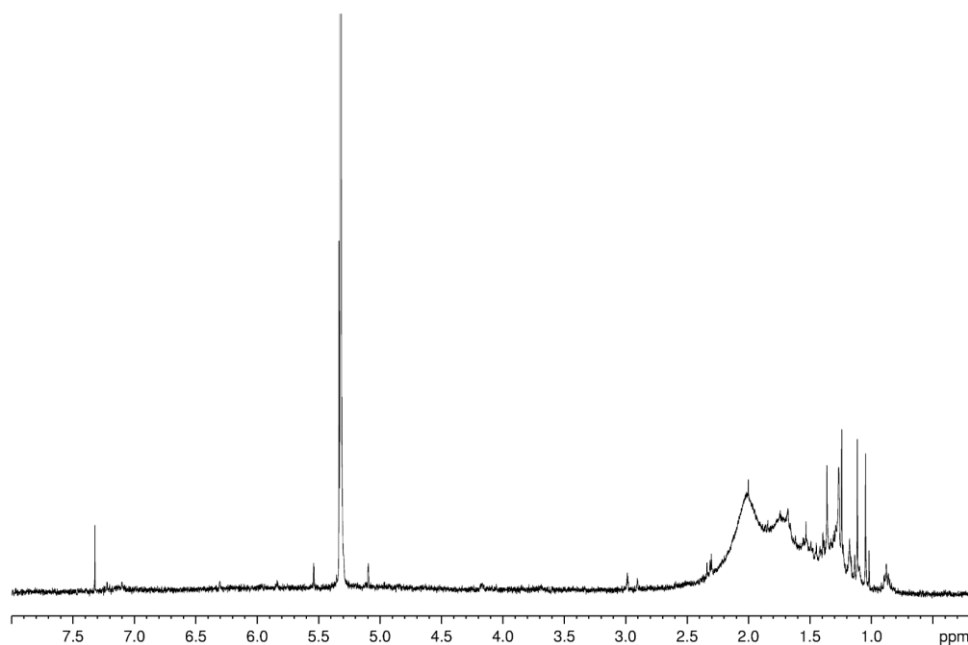

**Figure S43:**  $^1\text{H}$  NMR of the reaction of **20** with  $\text{Ag}[\text{FAI}]$  in  $\text{CD}_2\text{Cl}_2$  after 1 d.

## 2.16 [K(2,2,2-crypt)][(Cp''Co)(Cp''Ni)( $\mu,\eta^3:\eta^3$ -P<sub>3</sub>)] (22)

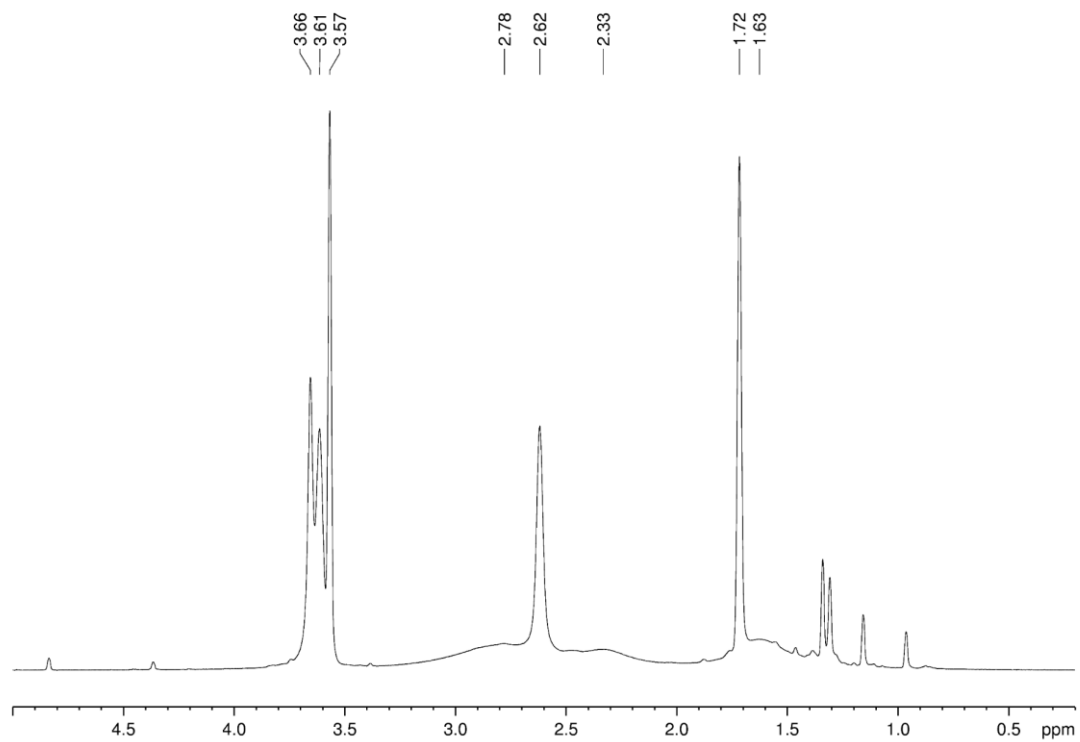

**Figure S44:** <sup>1</sup>H NMR of **22** in thf-d<sub>8</sub>.

## 2.17 [K(2,2,2-crypt)][(Cp''Co)(Cp''Ni)( $\mu,\eta^3:\eta^3$ -As<sub>3</sub>)] (23)

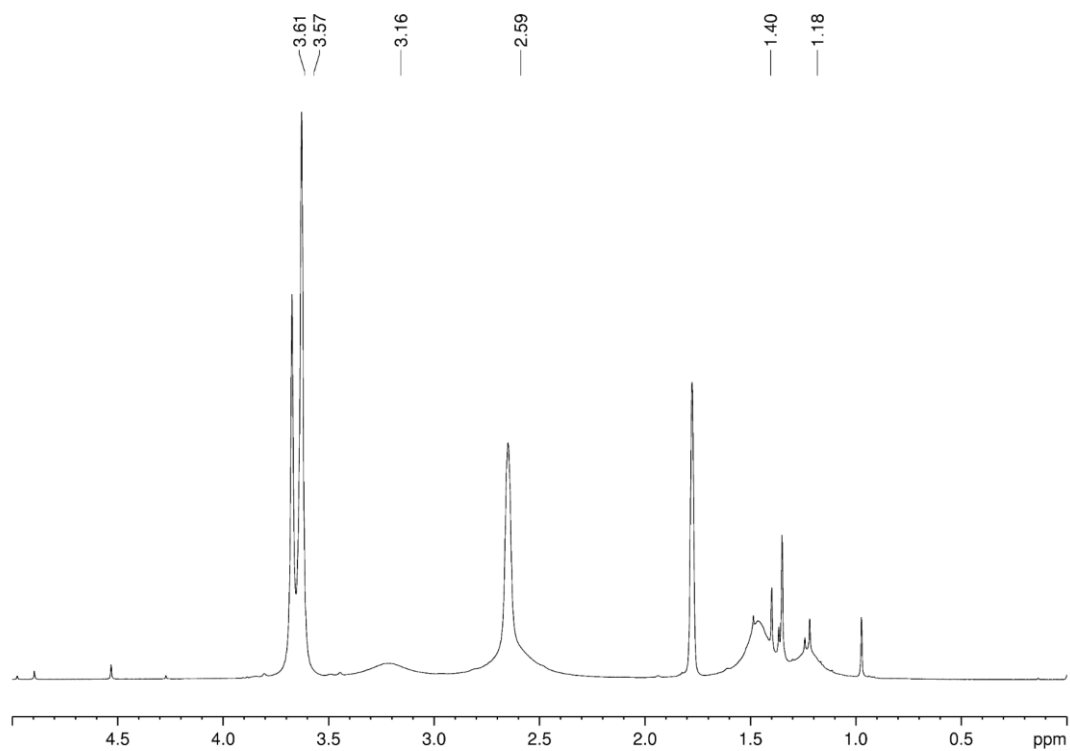

Figure S45: <sup>1</sup>H NMR of 23 in thf-d<sub>8</sub>.

### 3. Cyclic voltametric measurements

#### 3.1 $[(\text{Cp}^*\text{Fe})(\text{Cp}^{\text{**}}\text{Co})(\mu, \eta^5: \eta^5\text{-P}_5)]$ (**1**)

The measurement was conducted in 5 ml thf with 500 mg conducting salt  $[\text{Bu}_4\text{N}][\text{PF}_6]$  and 0.01 mmol of **1** were used. A platinum working electrode, a platinum counter electrode and a silver wire as a reference electrode were used. Ferrocene was added as an internal standard for referencing.

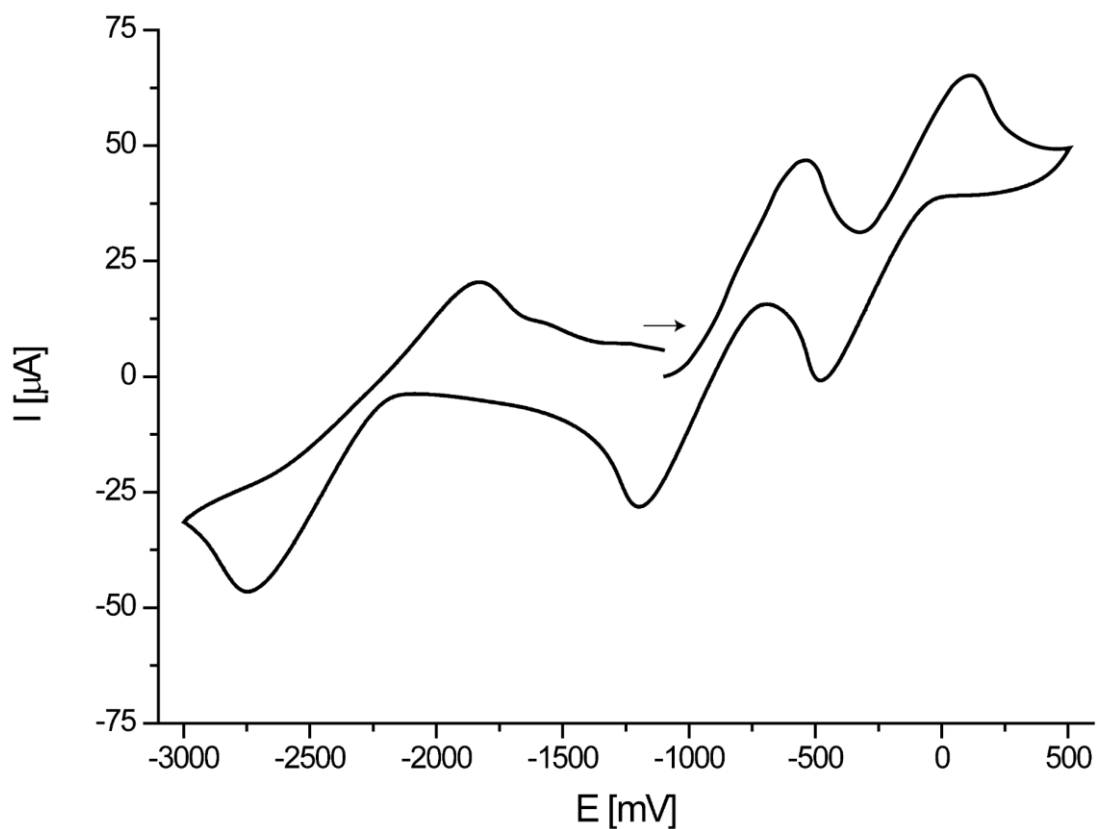

**Figure S46.** Cyclic voltammogram of **1** in thf against  $[\text{Cp}_2\text{Fe}]/[\text{Cp}_2\text{Fe}]^+$  (electrolyte  $\text{Bu}_4\text{NPF}_6$ , scan rate: 100 mV/s. temperature: r.t.).



### 3.2 [(Cp\*Fe)(Cp''Co)(μ,η<sup>5</sup>:η<sup>5</sup>-As<sub>5</sub>)] (2)

The measurement was conducted in 5 ml CH<sub>2</sub>Cl<sub>2</sub> with 750 mg conducting salt [<sup>n</sup>Bu<sub>4</sub>N][PF<sub>6</sub>] and 0.01 mmol of **2** were used. A platinum working electrode, a platinum counter electrode and a silver wire as a reference electrode were used. Ferrocene was added as an internal standard for referencing.

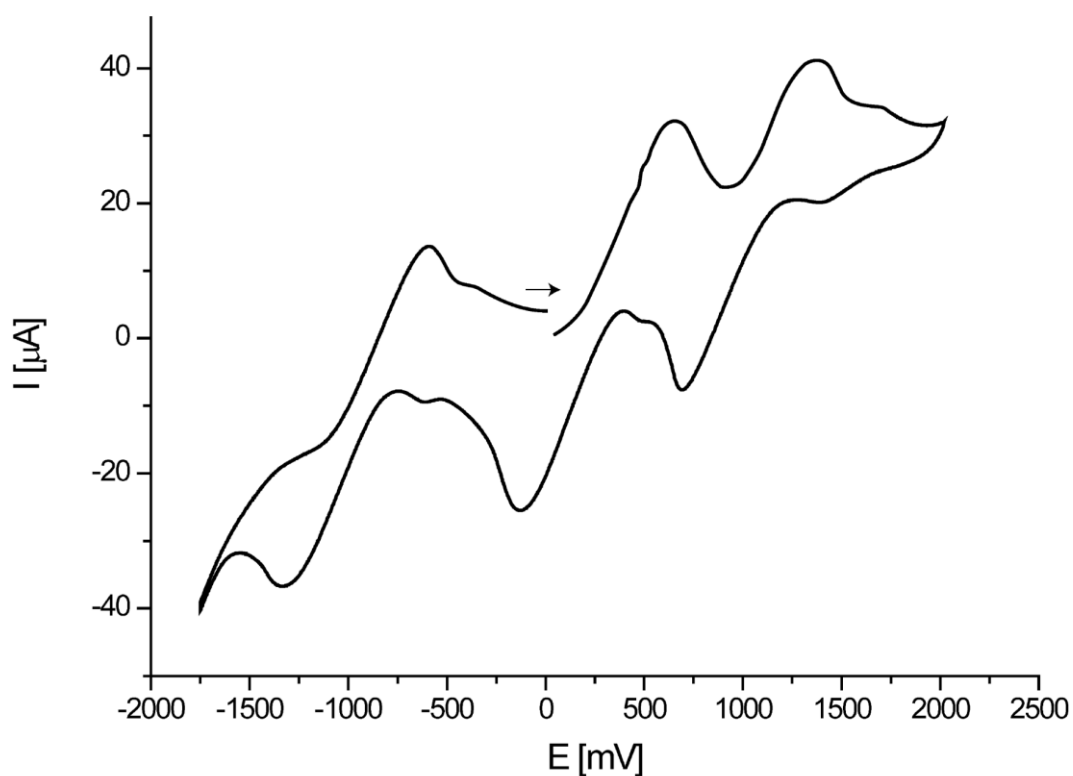

**Figure S47.** Cyclic voltammogram of **2** in CH<sub>2</sub>Cl<sub>2</sub> against [Cp<sub>2</sub>Fe]/[Cp<sub>2</sub>Fe]<sup>+</sup> (electrolyte <sup>n</sup>Bu<sub>4</sub>NPF<sub>6</sub>, scan rate: 100 mV/s. temperature: r.t.).

### 3.3 $[(\text{Cp}'''\text{Co})(\text{Cp}'''\text{Ni})(\mu, \eta^3: \eta^3\text{-P}_3)]$ (**10**)

The measurement was conducted in 5 ml *o*-difluorobenzene with 750 mg conducting salt  $[\text{tBu}_4\text{N}][\text{PF}_6]$  and 0.01 mmol of **10** were used. A platinum working electrode, a platinum counter electrode and a silver wire as a reference electrode were used. Ferrocene was added as an internal standard for referencing.

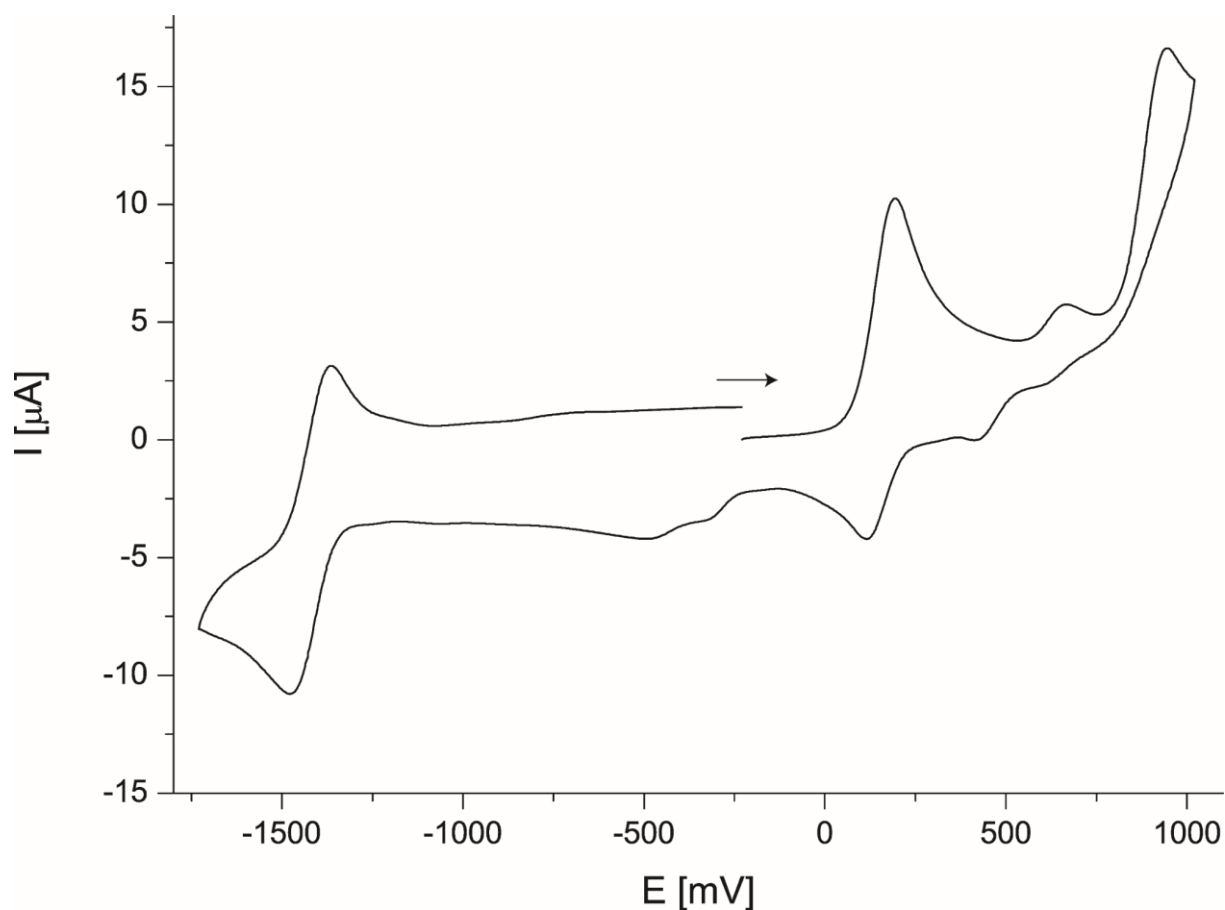

**Figure S48.** Cyclic voltammogram of **10** in *o*-C<sub>6</sub>H<sub>4</sub>F<sub>2</sub> against  $[\text{Cp}_2\text{Fe}]/[\text{Cp}_2\text{Fe}]^+$  (electrolyte  $^t\text{Bu}_4\text{NPF}_6$ , scan rate: 100 mV/s. temperature: r.t.).

### 3.4 [(Cp<sup>''</sup>Co)(Cp<sup>''</sup>Ni)(μ,η<sup>3</sup>:η<sup>3</sup>-As<sub>3</sub>)] (11)

The measurement was conducted in 5 ml dme with 500 mg conducting salt [<sup>n</sup>Bu<sub>4</sub>N][PF<sub>6</sub>] and 0.01 mmol of **11** were used. A platinum working electrode, a platinum counter electrode and a silver wire as a reference electrode were used. Ferrocene was added as an internal standard for referencing.

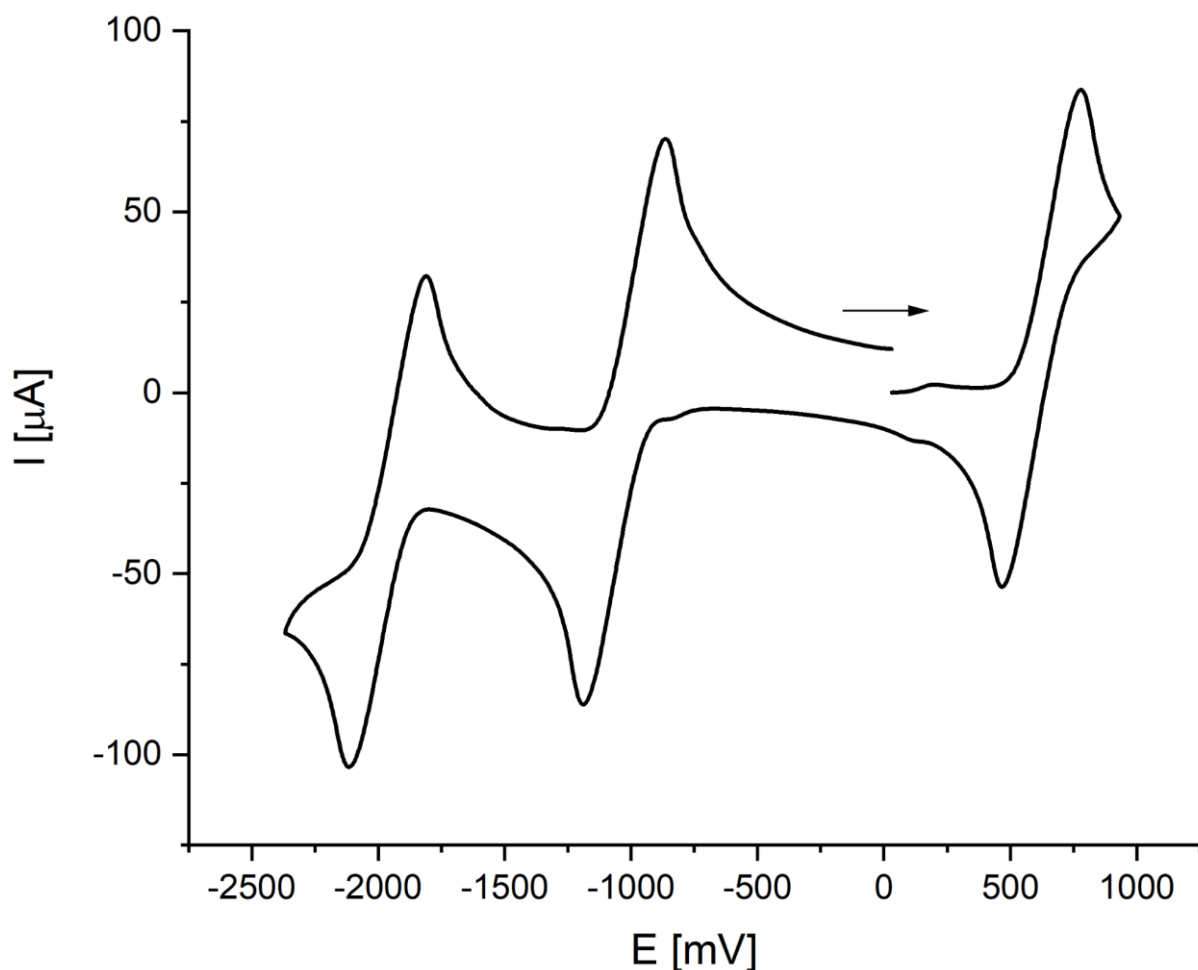

**Figure S49.** Cyclic voltammogram of **11** in dme against [Cp<sub>2</sub>Fe]/[Cp<sub>2</sub>Fe]<sup>+</sup> (electrolyte <sup>n</sup>Bu<sub>4</sub>NPF<sub>6</sub>, scan rate: 100 mV/s. temperature: r.t.).

## 4. Details on single crystal X-ray structure analysis

The X-ray diffraction experiments were performed on either an Gemini Ultra diffractometer (Oxford diffraction) with an AtlasS2 detector Mo radiation ( $\lambda = 0.71073 \text{ \AA}$ ) (**6**, **9**, **19**, **20**) or Cu-K $\alpha$  radiation ( $\lambda = 1.54178 \text{ \AA}$ ) (**4**, **15**), on a GV 50 diffractometer (Rigaku, formerly Agilent Technologies) with TitanS2 detector from applying Cu-K $\alpha$  radiation ( $\lambda = 1.54178 \text{ \AA}$ ) (**3**, **11**, **16**, **18**, **21**, [Cp<sup>'''</sup>Ni( $\eta^3$ -As<sub>3</sub>)]) or Cu-K $\beta$  radiation ( $\lambda = 1.39222 \text{ \AA}$ ) (**7**) or on a SuperNova (Agilent Technologies) with an Atlas detector applying Cu-K $\alpha$  radiation ( $\lambda = 1.54178 \text{ \AA}$ ) (**5**). All measurements were performed at 123 K. Data collection and reduction were performed with CrysAlispro (Version 171.37.34 (), 171.38.43, 2015 (**4**, **7**), 171.40.14a, 2018 (**3**, **5**, **6**, **9**, **11**, **16**, **17**, **18**, **20**, **21**), 171.41.27a, 2019 (**15**, [Cp<sup>'''</sup>Ni( $\eta^3$ -As<sub>3</sub>)]), 171.41.76a, 2020 (**19**)). For the compounds (**4**, **7**, **15**, [Cp<sup>'''</sup>Ni( $\eta^3$ -As<sub>3</sub>)]) an analytical numeric absorption correction using a multifaceted crystal model based on expressions derived by R.C.Clark & J.S. Reid was applied.<sup>[3]</sup> For the compounds (**3**, **5**, **6**, **9**, **11**, **16**, **18**, **19**, **20**, **21**) a gaussian absorption correction based on gaussian integration over a multifaceted crystal model was applied. All structures were solved by direct methods with ShelXT<sup>[4]</sup> and Olex2<sup>[5]</sup> and refined by full-matrix least-squares method against  $F^2$  in anisotropic approximation using ShelXL<sup>[4]</sup>. All non-hydrogen atoms were refined anisotropically. Hydrogen atoms were refined in calculated positions using riding on pivot atom model.

CCDC-2064647 (**3**), CCDC-2064648 (**4**), CCDC-2064649 (**5**), CCDC-2064650 (**6**), CCDC-2064651 (**7**), CCDC-2064652 (**9**), CCDC-2064653 (**11**), CCDC-2064654 (**15**), CCDC-2064655 (**16**), CCDC-2064656 (**17**), CCDC-2064657 (**18**), CCDC-2064658 (**19**), CCDC-2064659 (**21**), CCDC-2064660 (**22**), CCDC-2064661 (23) and CCDC-2064662 ([Cp<sup>'''</sup>Ni( $\eta^3$ -As<sub>3</sub>)]) contain the supplementary crystallographic data for this paper. These data can be obtained free of charge at [www.ccdc.cam.ac.uk/conts/retrieving.html](http://www.ccdc.cam.ac.uk/conts/retrieving.html) (or from the Cambridge Crystallographic Data Centre, 12 Union Road, Cambridge CB2 1EZ, UK; Fax: + 44-1223-336-033; e-mail: [deposit@ccdc.cam.ac.uk](mailto:deposit@ccdc.cam.ac.uk)).

## 4.1 [(Cp\*Fe)(Cp'''Co)(μ,η<sup>5</sup>:η<sup>5</sup>-P<sub>5</sub>)] [FAL] (3)

Compound **3** crystallizes from a concentrated solution in CH<sub>2</sub>Cl<sub>2</sub> layered with hexane at -30 °C in the triclinic space group  $P\bar{1}$  as dark green blocks. The asymmetric unit contains one cation **3**, one [FAL] counterion and 2.5 molecules CH<sub>2</sub>Cl<sub>2</sub>. A solvent mask was calculated and 193 electrons were found in a volume of 820 Å<sup>3</sup> in two voids. This is consistent with the presence of 2.5 CH<sub>2</sub>Cl<sub>2</sub> per asymmetric unit which account for 210 electrons per unit cell. The structure in solid state is depicted in Figure S50 and S51.

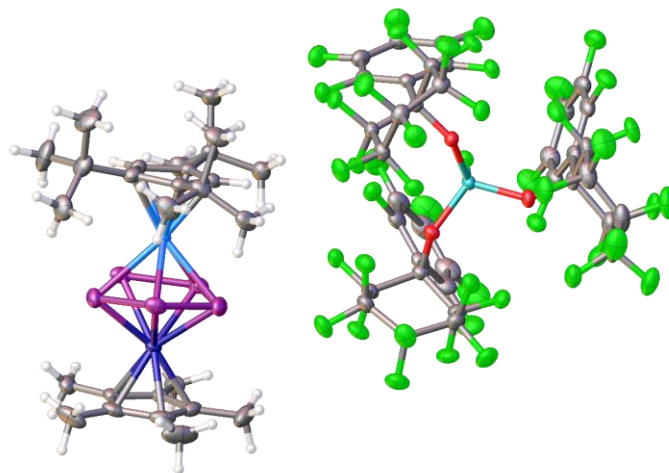

**Figure S50:** Molecular structure of **3** in the solid state. Thermal ellipsoids are drawn with 50 % probability level.

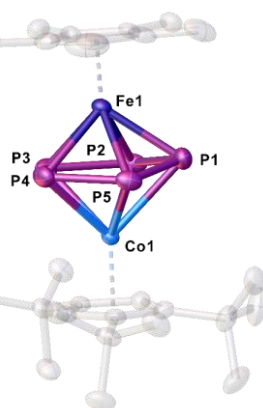

**Figure S51:** Molecular structure of the cation in **3** in the solid state. Hydrogen atoms are omitted for clarity. Thermal ellipsoids are drawn with 50 % probability level. Selected bond lengths [Å] and angles [°]: Co1-Fe1 3.1539(4), P1-P2 2.1215(9), P2-P3 2.1601(9), P3-P4 2.1226(9), P4-P5 2.1518(9), P1-P5 2.1400(8), P2-P4-P5-P1 9.363, (Cp\*-centroid)FeCo(Cp'''-centroid) 176.043.

## 4.2 $[(\text{Cp}^*\text{Fe})(\text{Cp}'''\text{Co})(\mu, \eta^5: \eta^5\text{-As}_5)][\text{FAl}]$ (**4**)

Compound **4** crystallizes from a concentrated solution in  $\text{CH}_2\text{Cl}_2$  layered with hexane at  $-30\text{ }^\circ\text{C}$  in the triclinic space group  $P\bar{1}$  as dark brown plates. The asymmetric unit contains one cation **4**, one [FAL] counterion and 2.5 molecules  $\text{CH}_2\text{Cl}_2$ . A solvent mask was calculated and 206 electrons were found in a volume of  $808\text{ \AA}^3$  in two voids. This is consistent with the presence of five  $\text{CH}_2\text{Cl}_2$  per unit cell. The structure in solid state is depicted in Figure S52 and S53.

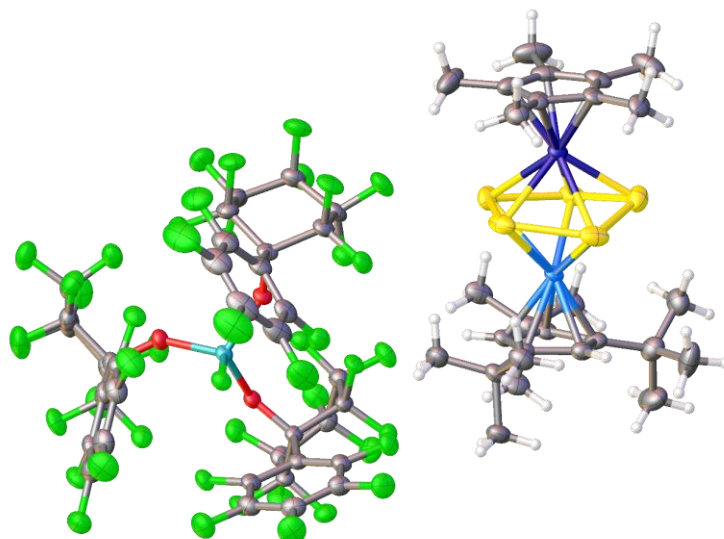

**Figure S52:** Molecular structure of **4** in the solid state. Thermal ellipsoids are drawn with 50 % probability level.

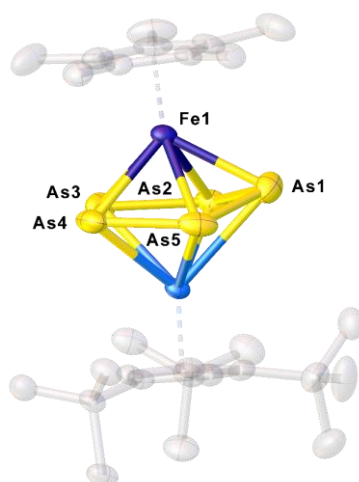

**Figure S53:** Molecular structure of the cation in **4** in the solid state. Hydrogen atoms are omitted for clarity. Thermal ellipsoids are drawn with 50 % probability level. Selected bond lengths [ $\text{\AA}$ ] and angles [ $^\circ$ ]: Co1-Fe1 3.2188(6), As1-As2 2.3392(7), As2-As3 2.3596(7), As3-As4 2.3252(8), As4-As5 2.3619(8), As1-As5 2.3224(8), As2-As4-As5-As1 13.611, (Cp<sup>\*</sup>-centroid)FeCo(Cp<sup>'''</sup>-centroid) 174.958.

### 4.3 $[(\text{Cp}^*\text{Fe})(\text{Cp}'''\text{Co})(\mu,\eta^5:\eta^5\text{-P}_5)][\text{FAL}]_2$ (**5**)

Compound **5** crystallizes from a concentrated solution in *o*-C<sub>6</sub>H<sub>4</sub>F<sub>2</sub> layered with toluene at -30 °C in the monoclinic space group *P*2<sub>1</sub> as dark brown blocks. The asymmetric unit contains one dication **5**, two [FAL] counterions 3 molecules *o*-C<sub>6</sub>H<sub>4</sub>F<sub>2</sub> and 0.5 molecule toluene. The toluene molecule (0.5) share the position with 0.5 molecules *o*-C<sub>6</sub>H<sub>4</sub>F<sub>2</sub>. The restraints SADI, SIMU, FLAT were applied to describe the solvent molecules appropriate. The structure in solid state is depicted in Figure S54 and S55.

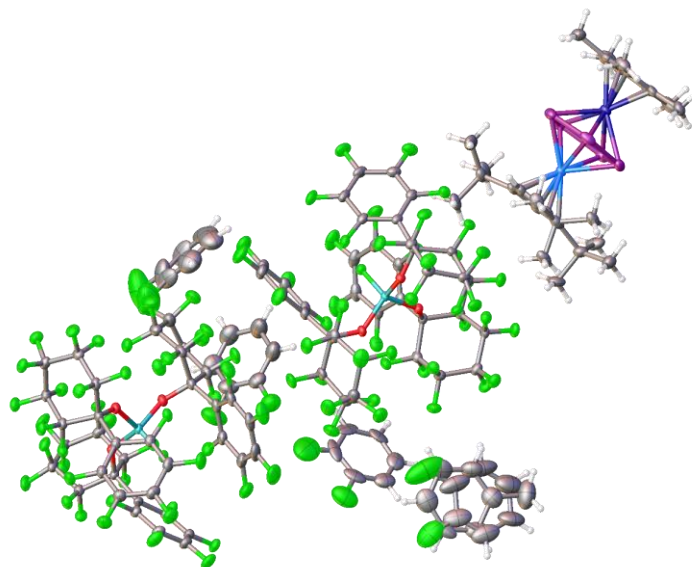

**Figure S54:** Molecular structure of **5** in the solid state. Thermal ellipsoids are drawn with 50 % probability level.

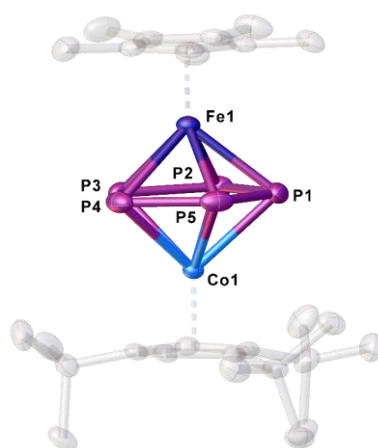

**Figure S55:** Molecular structure of the dication in **5** in the solid state. Hydrogen atoms are omitted for clarity. Thermal ellipsoids are drawn with 50 % probability level. Selected bond lengths [Å] and angles [°]: Fe1-Co1 3.0637(8), P1-P2 2.1449(12), P2-P3 2.1440(12), P3-P4 2.1439(12), P4-P5 2.1422(13), P1-P5 2.1523(13), P2-P4-P5-P1 -0.841, (Cp\*-centroid)FeCo(Cp'''-centroid).

#### 4.4 $[(\text{Cp}^*\text{Fe})(\text{Cp}'''\text{Co})(\mu,\eta^5:\eta^5\text{-As}_5)][\text{FAl}]_2$ (**6**)

Compound **6** crystallizes from a concentrated solution in *o*-C<sub>6</sub>H<sub>4</sub>F<sub>2</sub> layered with toluene at -30 °C in the monoclinic space group *P*2<sub>1</sub> as dark brown blocks. The asymmetric unit contains one dication of **6**, two [FAl] counterions 3.5 molecules *o*-C<sub>6</sub>H<sub>4</sub>F<sub>2</sub>. A solvent mask was calculated and 298 electrons were found in a volume of 1198 Å<sup>3</sup> in one void. This is consistent with the presence of seven molecules *o*-C<sub>6</sub>H<sub>4</sub>F<sub>2</sub> per unit cell. A twin refinement (BASF of 0.216) was applied. The structure in solid state is depicted in Figure S56 and S57.

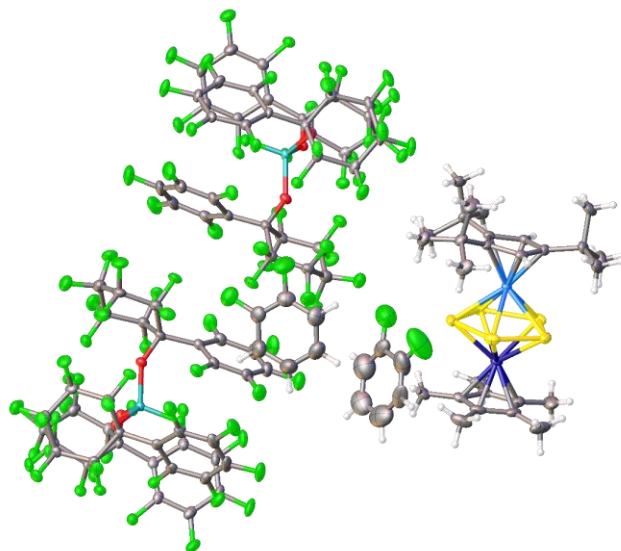

**Figure S56:** Molecular structure of **6** in the solid state. Thermal ellipsoids are drawn with 50 % probability level.

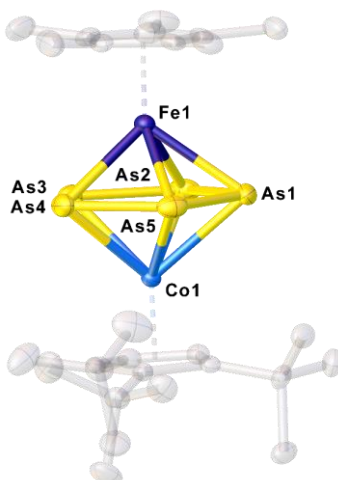

**Figure S57:** Molecular structure of the dication **6** in the solid state. Hydrogen atoms are omitted for clarity. Thermal ellipsoids are drawn with 50 % probability level. Selected bond lengths [Å] and angles [°]: Fe1-Co1 3.0891(9), As1-As2 2.3518(6), As2-As3 2.3418(6), As3-As4 2.3380(6), As4-As5 2.3493(6), As1-As5 2.3410(7), As2-As4-As5-As1 1.419, (Cp\*-centroid)FeCo(Cp'''-centroid) 177.368.



## 4.5 [K(2,2,2-crypt)][(Cp\*Fe)(Cp'''Co)( $\mu,\eta^4:\eta^3$ -P<sub>5</sub>)] (7)

Compound **7** crystallizes from a concentrated solution in dme layered with hexane at -30 °C in the triclinic space group  $P\bar{1}$  as dark green blocks. The asymmetric unit contains two anions of **7**, two potassium counterions chelated by 2,2,2-cryptand and 0.45 molecules hexane. Both cations are disordered over two positions, one anion is disordered over two positions, the Cp\* ligand of the other anion is disordered over three positions. The restraints SIMU, SADI and RIGU were applied to describe the disorder appropriate. A solvent mask was calculated and 44 electrons in a void of 152 Å<sup>3</sup> was found. This is consistent with the presence of 0.9 molecules hexane per unit cell. The structure in solid state is depicted in Figure S58 and S59.

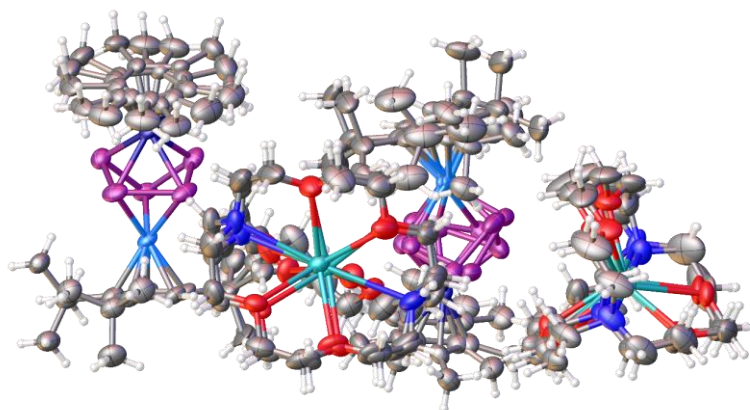

**Figure S58:** Molecular structure of **7** in solid state. Thermal ellipsoids are drawn with 50 % probability level.

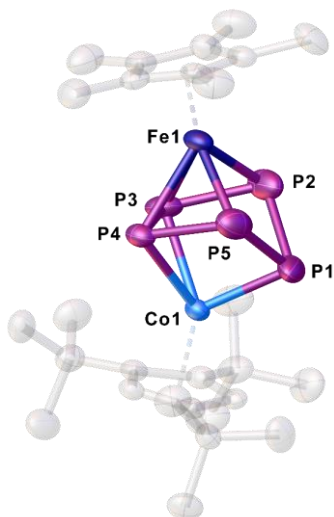

**Figure S59:** Molecular structure of the non-disordered anion (P<sub>5</sub> ligand) in **7** in the solid state. Hydrogen atoms are omitted for clarity. Thermal ellipsoids are drawn with 50 % probability level. Selected bond lengths [Å] and angles [°]: Fe1-Co1 3.6620(6), P1-P2 2.1952(9), P2-P3 2.1741(12), P3-P4 2.2456(13), P4-P5 2.1770(12), P1-P5 2.2083(11), P2-P4-P5-P1 -44.456, (Cp\*-centroid)FeCo(Cp'''-centroid) 152.772.

## 4.6 [K(2,2,2-crypt)][(Cp\*Fe)(Cp'''Co)( $\mu,\eta^4:\eta^4$ -As<sub>6</sub>)] (**9**)

Compound **9** crystallizes from a concentrated solution in dme layered with hexane at room temperature in the triclinic space group  $P\bar{1}$  as dark brown plates. The asymmetric unit contains one anion of **9** and one potassium ion chelated by 2,2,2-cryptand. The structure in solid state is depicted in Figure S60 and S61.

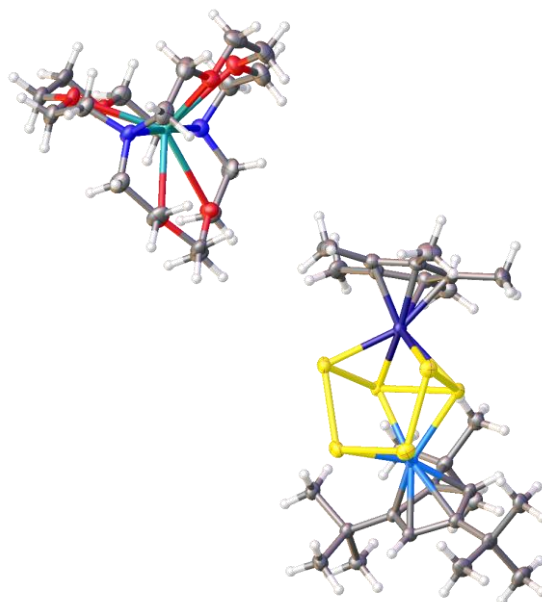

**Figure S60:** Molecular structure of **9** in solid state. Thermal ellipsoids are drawn with 50 % probability level.

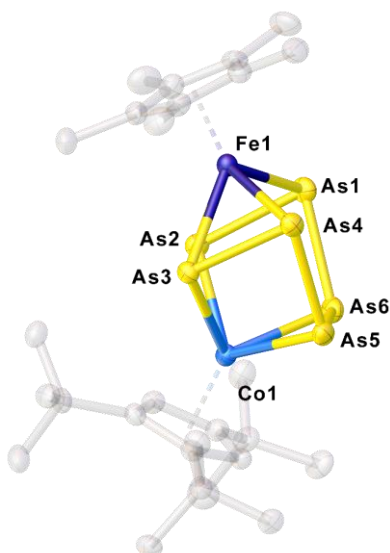

**Figure S61:** Molecular structure of the anion in **9** in the solid state. Hydrogen atoms are omitted for clarity. Thermal ellipsoids are drawn with 50 % probability level. Selected bond lengths [ $\text{\AA}$ ] and angles [ $^\circ$ ]: Fe1-Co1 3.8385(6), As1-As2 2.3871(5), As2-As3 2.6901(7), As3-As4 2.3843(5), As4-As5 2.4420(5), As5-As6 2.3441(5), As1-As6 2.4406(6), (Cp\*-centroid)FeCo(Cp'''-centroid) 129.762.

## 4.7 [(Cp<sup>'''</sup>Co)(Cp<sup>'''</sup>Ni)(μ,η<sup>3</sup>:η<sup>3</sup>-As<sub>3</sub>)] (11)

Compound **11** crystallizes from a concentrated solution in CH<sub>2</sub>Cl<sub>2</sub> layered with MeCN at room temperature in the triclinic space group  $P\bar{1}$  as dark green needles. The asymmetric unit contains one molecule of **11**. Since both {Cp<sup>'''</sup>M} fragments contain the same Cp<sup>'''</sup> ligand and a mixed occupation could not be neglected both metal atoms are refined as 50 % Co and 50 % Ni. The structure in solid state is depicted in Figure S62 and S63.

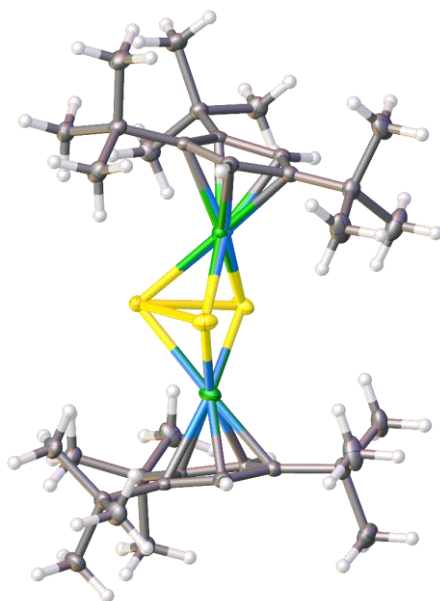

**Figure S62:** Molecular structure of **11** in solid state. Thermal ellipsoids are drawn with 50 % probability level.

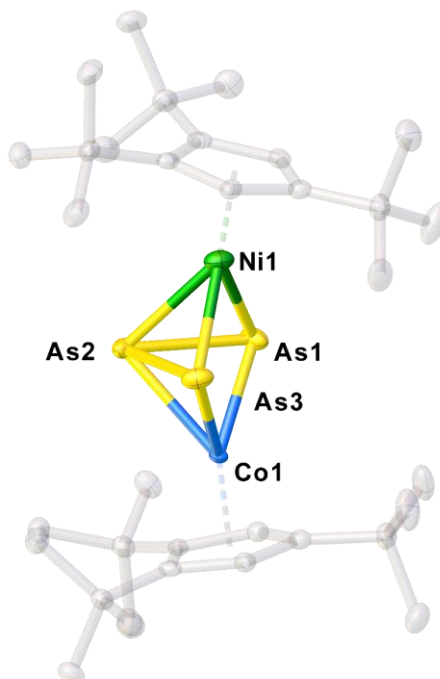

**Figure S63:** Molecular structure of one part of **11** in the solid state. Hydrogen atoms are omitted for clarity. Thermal ellipsoids are drawn with 50 % probability level. Selected bond lengths [Å] and angles [°]: Co1-Ni1 3.495(5), As1-As2 2.4130(3), As2-As3 2.4155(3), As1-As3 2.9891(3), (Cp<sup>'''</sup>-centroid)CoNi(Cp<sup>'''</sup>-centroid) 162.947.

## 4.8 $[(\text{Cp}'''\text{Ni})_2(\mu, \eta^3: \eta^3\text{-As}_3)][\text{FAI}]$ (**15**)

Compound **15** crystallizes from a concentrated solution in  $\text{CH}_2\text{Cl}_2$  layered with pentane at room temperature in the triclinic space group  $P\bar{1}$  as dark brown blocks. The asymmetric unit contains one cation of **15** and one [FAI] counterion. The structure in solid state is depicted in Figure S64 and S65.

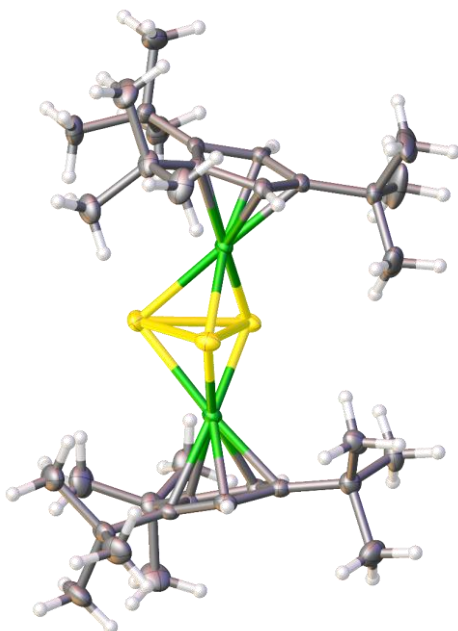

**Figure S64:** Molecular structure of **15** in the solid state. Thermal ellipsoids are drawn with 50 % probability level.

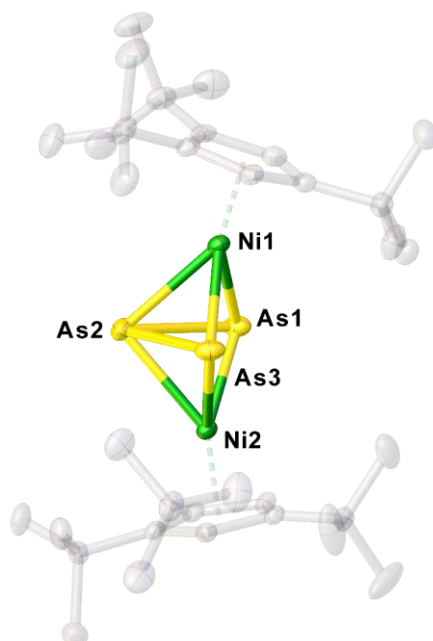

**Figure S65:** Molecular structure of the cation in **15** in the solid state. Hydrogen atoms are omitted for clarity. Thermal ellipsoids are drawn with 50 % probability level. Selected bond lengths [ $\text{\AA}$ ] and angles [ $^\circ$ ]: Ni1-Ni2 3.5434(5), As1-As2 2.4179(4), As2-As3 2.4294(3), As1-As3 2.8730(4), (Cp'''-centroid)CoNi(Cp'''-centroid) 156.046.

## 4.9 [(Cp<sup>'''</sup>Co)<sub>2</sub>(μ,η<sup>3</sup>:η<sup>3</sup>-P<sub>3</sub>)] [FAI] (**16**)

Compound **16** crystallizes from a concentrated solution in CH<sub>2</sub>Cl<sub>2</sub> layered with toluene at -30 °C in the monoclinic space group *P2*<sub>1</sub>/*c* as dark red rods. The asymmetric unit contains one cation of **16**, one [FAI] counterion 1.4 molecules CH<sub>2</sub>Cl<sub>2</sub> and 0.9 molecules toluene. The toluene molecule is disordered over two positions with site occupancies of 0.55 and 0.35. The restraints SADI and SIMU were applied to describe the disorder. The structure in solid state is depicted in Figure S66 and S67.

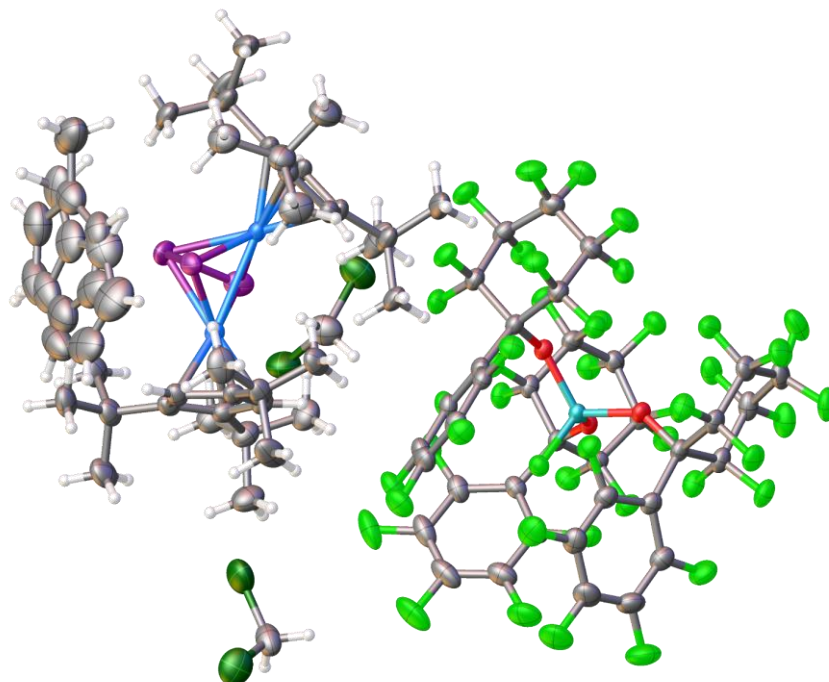

**Figure S66:** Molecular structure of **16** in the solid state. Thermal ellipsoids are drawn with 50 % probability level.

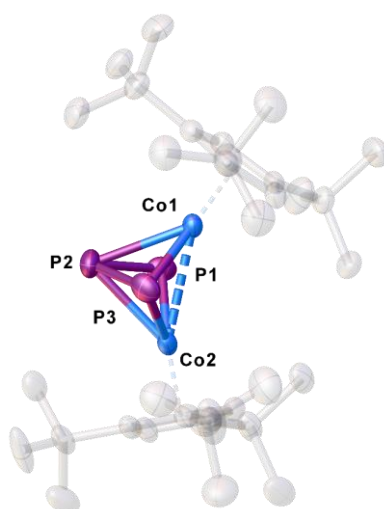

**Figure S67:** Molecular structure of the cation in **16** in the solid state. Hydrogen atoms are omitted for clarity. Thermal ellipsoids are drawn with 50 % probability level. Selected bond lengths [Å] and angles [°]: Co1-Co2 2.6213(6), P1-P2 2.1532(12), P2-P3 2.1516(12), P1-P3 3.2571(11), (Cp<sup>'''</sup>-centroid)CoCo(Cp<sup>'''</sup>-centroid) 133.616.

## 4.10 $[(\text{Cp}'''\text{Co})_2(\mu,\eta^3:\eta^3\text{-As}_3)][\text{FAI}]$ (**17**)

Compound **17** crystallizes from a concentrated solution in  $o\text{-C}_6\text{H}_4\text{F}_2$  layered with pentane at  $-30\text{ }^\circ\text{C}$  in the monoclinic space group  $P2_1/c$  as dark brown blocks. The asymmetric unit contains one cation of **17**, one [FAI] counterion and two molecules  $o\text{-C}_6\text{H}_4\text{F}_2$ . One  $o\text{-C}_6\text{H}_4\text{F}_2$  molecule is disordered over three positions with side occupancies of 0.75, 0.125 and 0.125. The restraints SADI, SIMU, DFIX and DANG were applied to describe the disorder. The structure in solid state is depicted in Figure S68 and S69.

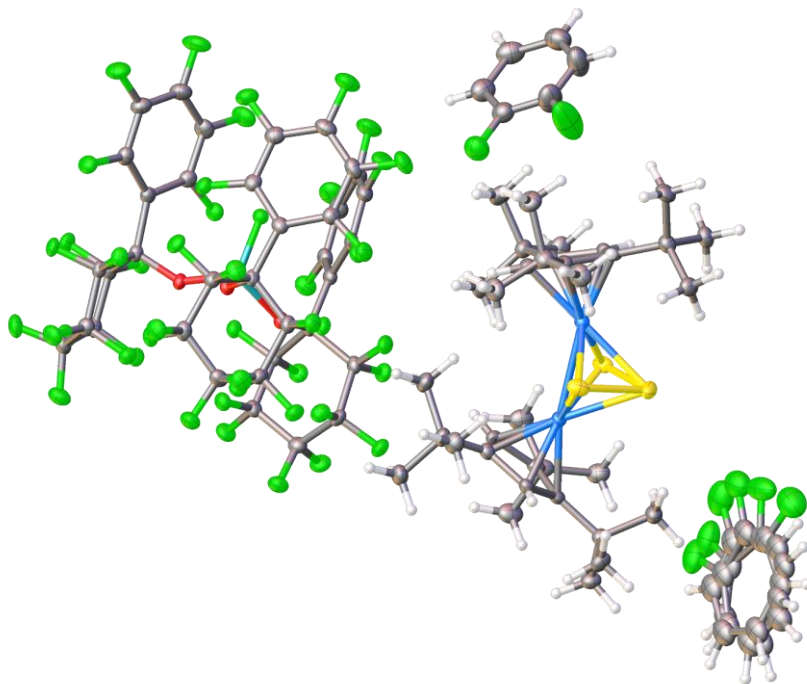

**Figure S68:** Molecular structure of **17** in the solid state. Thermal ellipsoids are drawn with 50 % probability level.

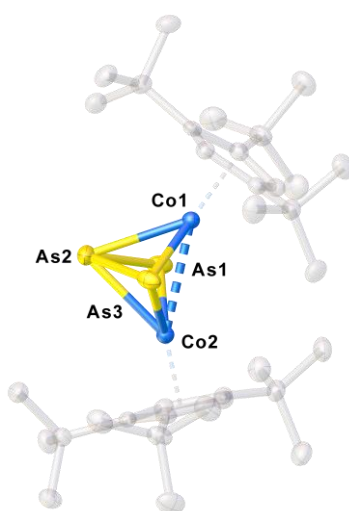

**Figure S69:** Molecular structure of the cation in **17** in the solid state. Hydrogen atoms are omitted for clarity. Thermal ellipsoids are drawn with 50 % probability level. Selected bond lengths [ $\text{\AA}$ ] and angles [ $^\circ$ ]: Co1-Co2 2.6827(6), As1-As2 2.3770(5), As2-As3 2.3638(5), As1-As3 3.5176(6), (Cp'''-centroid)CoCo(Cp'''-centroid) 132.367.

## 4.11 [(Cp'''Co)(Cp''Ni)( $\mu,\eta^3:\eta^2$ -P<sub>3</sub>)] (18)

Compound **18** crystallizes from a concentrated solution in CH<sub>2</sub>Cl<sub>2</sub> layered with MeCN at room temperature in the monoclinic space group  $P2_1/n$  as dark brown needles. The asymmetric unit contains one molecule of **18**. The structure in solid state is depicted in Figure S70.

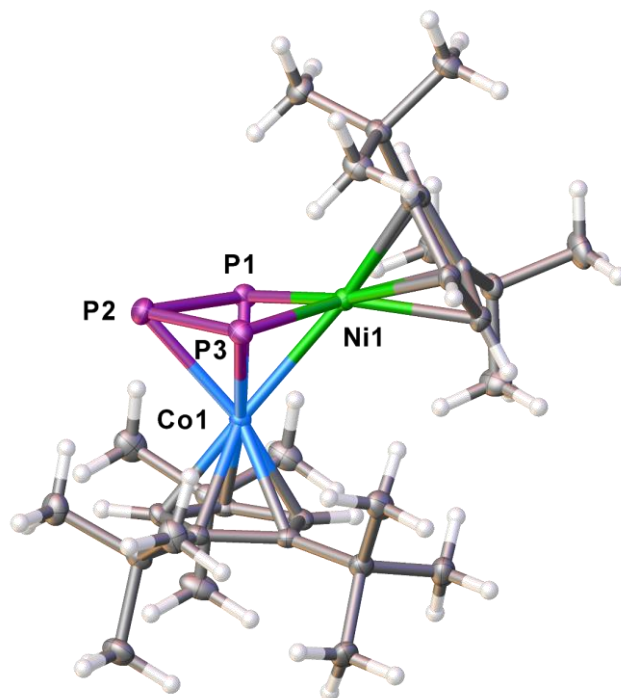

**Figure S70:** Molecular structure of **18** in the solid state. Thermal ellipsoids are drawn with 50 % probability level. Selected bond lengths [ $\text{\AA}$ ] and angles [ $^\circ$ ]: Co1-Ni1 2.5588(4), P1-P2 2.1361(6), P2-P3 2.1514(6), P1-P3 2.8677(6), (Cp'''-centroid)CoNi(Cp'''-centroid) 118.650.

## 4.12 $[(\text{Cp}'''\text{Co})(\text{Cp}''\text{Ni})(\mu_4, \eta^3: \eta^2: \eta^1: \eta^1\text{-P}_3)\text{Ag}(\text{CH}_2\text{Cl}_2)]_2[\text{FAl}]_2$ (19)

Compound **19** crystallizes from a concentrated solution in  $\text{CH}_2\text{Cl}_2$  layered with hexane at room temperature in the monoclinic space group  $C2_1/c$  as dark brown blocks. The asymmetric unit contains one cation of **19**, one [FAl] counterion and 1.4 molecules  $\text{CH}_2\text{Cl}_2$ . The silver atom is disordered over two positions with site occupancies of 0.97 and 0.03. The restraints SADI and SIMU were applied to describe the disorder. The structure in the solid state is depicted in Figure S71 and S72.

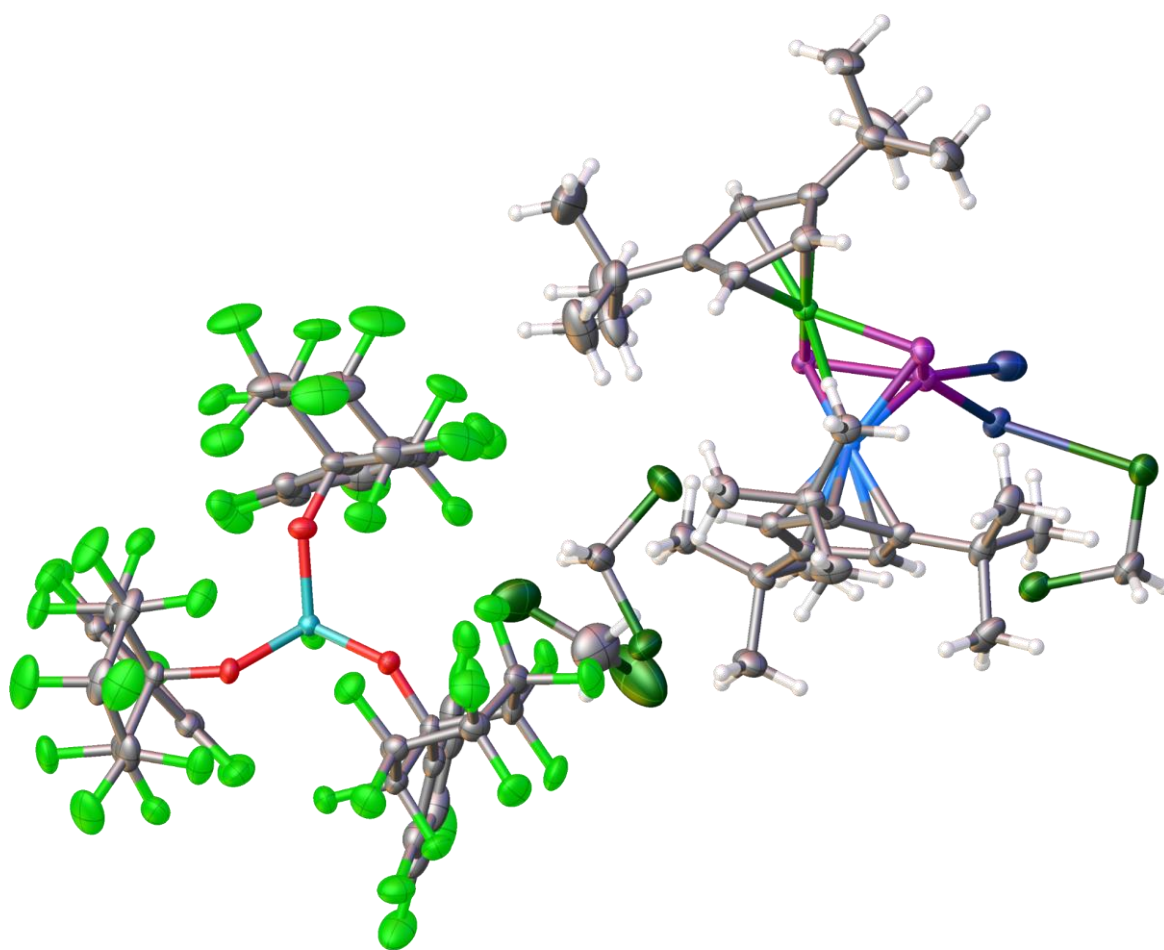

**Figure S71:** Molecular structure of **19** in the solid state. Thermal ellipsoids are drawn with 50 % probability level.



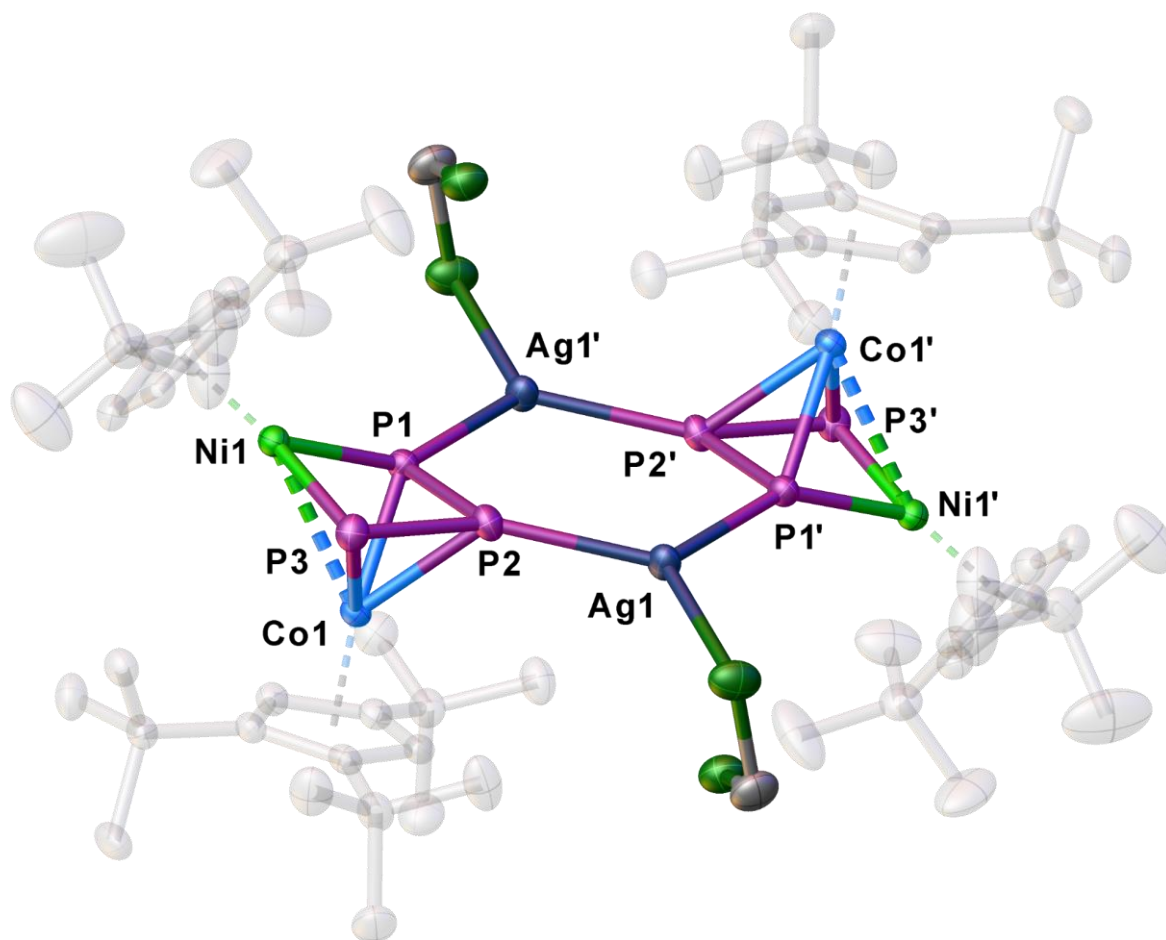

**Figure S72:** Molecular structure of the full cation in **19** in the solid state. Hydrogen atoms are omitted for clarity. Thermal ellipsoids are drawn with 50 % probability level. Selected bond lengths [Å] and angles [°]: Co1-Ni1/Co1'-Ni1' 2.5846(4), P1-P2/P1'-P2' 2.1277(9), P2-P3/P2'-P3' 2.1407(9), P1-P3/P1'-P3' 2.9733(8), P1-Ag1/P1'-Ag1' 2.4404(7), P2'-Ag1/P2-Ag1' 2.4256(7), (Cp'''-centroid)CoNi(Cp'''-centroid) 121.947.

### 4.13 $[(\text{Cp}^{\text{***}}\text{Co})(\text{Cp}^{\text{***}}\text{Ni})(\mu, \eta^3: \eta^3: \eta^1\text{-P}_3)\{\text{W}(\text{CO})_5\}][\text{FAI}]$ (**21**)

Compound **21** crystallizes from a concentrated solution in  $\text{CH}_2\text{Cl}_2$  layered with pentane at room temperature in the triclinic space group  $P\bar{1}$  as dark brown blocks. The asymmetric unit contains one cation of **21**, one [FAI] counterion and one molecule  $\text{CH}_2\text{Cl}_2$ . The solvent molecule is disordered over two positions with site occupancies of 0.59 and 0.41. The structure in the solid state is depicted in Figure S73 and S74.

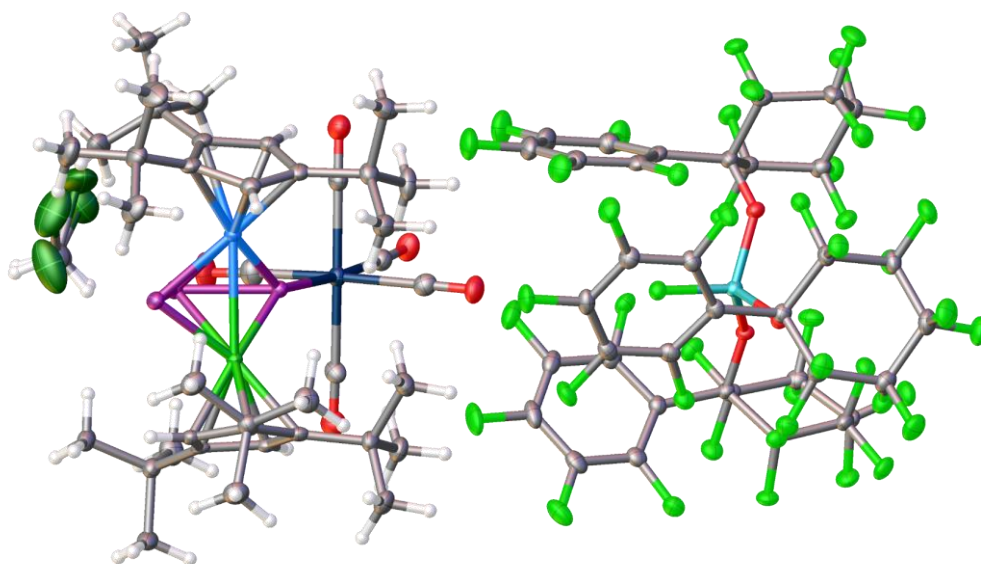

**Figure S73:** Molecular structure of **21** in the solid state. Thermal ellipsoids are drawn with 50 % probability level.

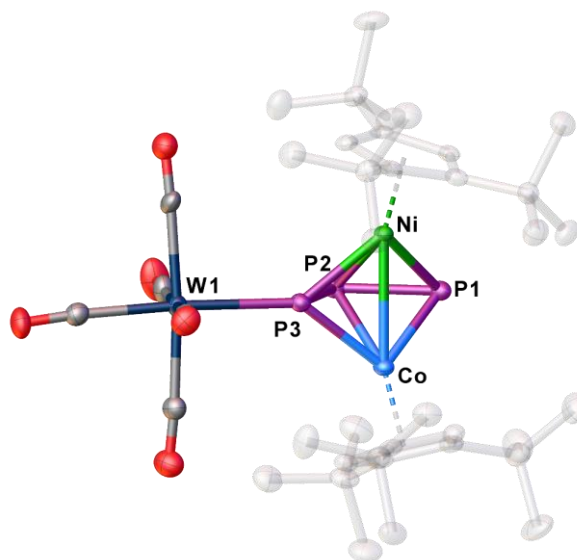

**Figure S74:** Molecular structure of the cation in **21** in the solid state. Hydrogen atoms and solvent molecules are omitted for clarity. Thermal ellipsoids are drawn with 50 % probability level. Selected bond lengths [ $\text{\AA}$ ] and angles [ $^\circ$ ]: Co1-Ni1 2.6783(7), P1-P2 2.1228(13), P2-P3 2.2180(12), P1-P3 3.2798(12), ( $\text{Cp}^{\text{***}}$ -centroid)CoNi( $\text{Cp}^{\text{***}}$ -centroid) 142.990.

#### 4.14 [K(2,2,2-crypt)][(Cp<sup>'''</sup>Co)(Cp<sup>'''</sup>Ni)(μ,η<sup>3</sup>:η<sup>3</sup>-P<sub>3</sub>)] (**22**)

Compound **22** crystallizes from a concentrated solution in thf layered with hexane at room temperature in the triclinic space group  $P\bar{1}$  as dark brown plates. The asymmetric unit contains one anion of **22** and one [K(2,2,2-crypt)] counterion. Since both {Cp<sup>'''</sup>M} fragments contain the same Cp<sup>'''</sup> ligand and a mixed occupation could not be neglected both metal atoms are refined as 50 % Co and 50 % Ni. The P<sub>3</sub> ligand is disordered over two positions with site occupancies of 70 and 30 %. The structure in the solid state is depicted in Figure S75 and S76.

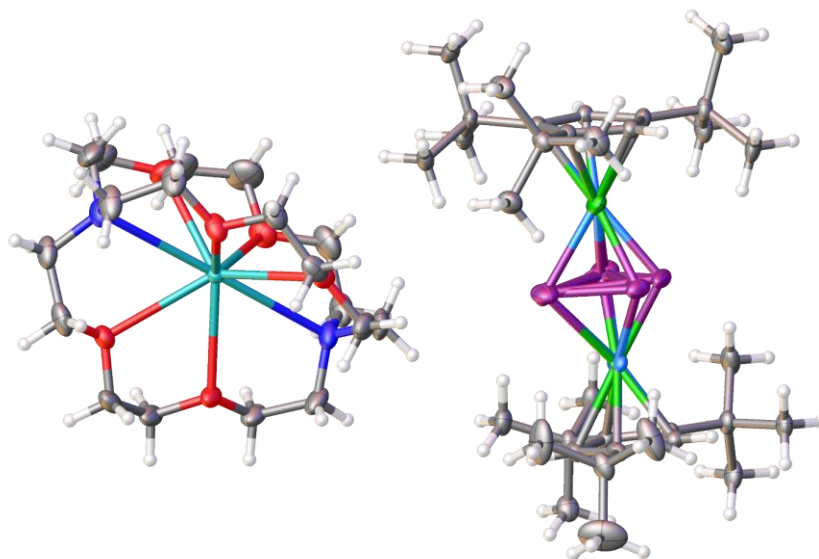

**Figure S75:** Molecular structure of **22** in the solid state. Thermal ellipsoids are drawn with 50 % probability level.

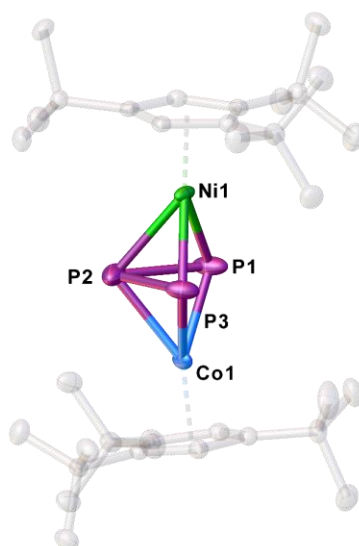

**Figure S76:** Molecular structure of the anion of **22** in the solid state. Hydrogen atoms are omitted for clarity. Depicted is only the part with higher occupancy (70 %). Thermal ellipsoids are drawn with 50 % probability level. Selected bond lengths [Å] and angles [°]: Co1-Ni1 3.588(4), P1-P2 2.1792(10), P2-P3 2.172(1), P1-P3 2.5537(11), (Cp<sup>'''</sup>-centroid)CoNi(Cp<sup>'''</sup>-centroid) 174.077.

## 4.15 [K(2,2,2-cryptand)][(Cp<sup>'''</sup>Co)(Cp<sup>'''</sup>Ni)(μ,η<sup>3</sup>:η<sup>3</sup>-As<sub>3</sub>)] (23)

Compound **23** crystallizes from a concentrated solution in thf layered with hexane at room temperature in the triclinic space group  $P\bar{1}$  as dark brown blocks. The asymmetric unit contains one anion of **23**, one counterion. The As<sub>3</sub> ligand is disordered over two positions with site occupancies of 0.83 and 0.17. Since both {Cp<sup>'''</sup>M} fragments contain the same Cp<sup>'''</sup> ligand and a mixed occupation could not be neglected both metal atoms are refined as 50 % Co and 50 % Ni. The structure in the solid state is depicted in Figure S77 and S78.

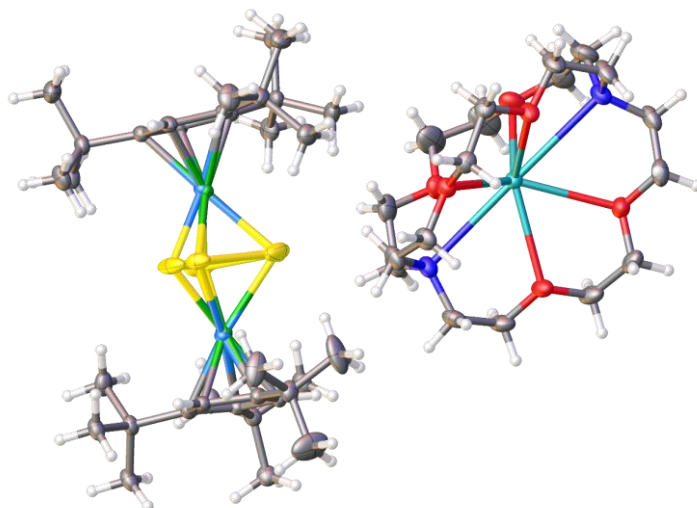

**Figure S77:** Molecular structure of **23** in the solid state. Thermal ellipsoids are drawn with 50 % probability level.

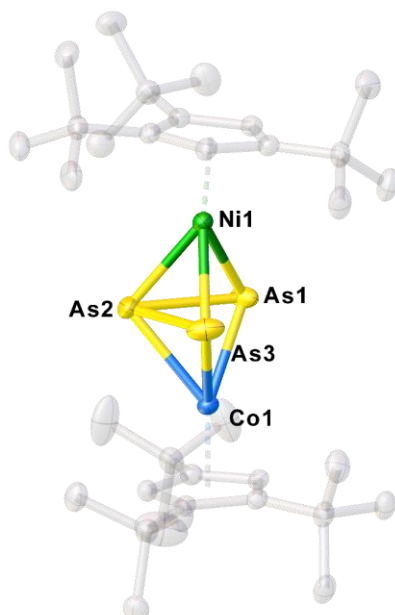

**Figure S78:** Molecular structure of the anion of **23** in the solid state. Hydrogen atoms are omitted for clarity. Thermal ellipsoids are drawn with 50 % probability level. Selected bond lengths [Å] and angles [°]: Co1-Ni1 3.688(7), As1-As2 2.4323(7), As2-As3 2.3962(12), As1-As3 2.7799(10), (Cp<sup>'''</sup>-centroid)CoNi(Cp<sup>'''</sup>-centroid) 174.876.

## 4.16 [Cp<sup>''</sup>Ni(η<sup>3</sup>-As<sub>3</sub>)]

[Cp<sup>''</sup>Ni(η<sup>3</sup>-As<sub>3</sub>)] crystallizes from a concentrated solution in a mixture of toluene and CH<sub>2</sub>Cl<sub>2</sub> (1:2) at -30 °C in the monoclinic space group *P*2<sub>1</sub>/*c* as dark red blocks. The asymmetric unit contains one molecule of [Cp<sup>''</sup>Ni(η<sup>3</sup>-As<sub>3</sub>)]. The structure in solid state is depicted in Figure S79.

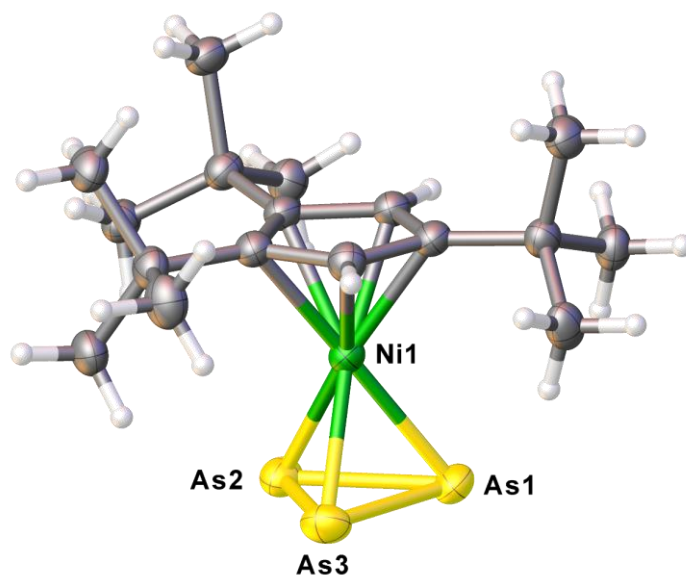

**Figure S79:** Molecular structure [Cp<sup>''</sup>Ni(η<sup>3</sup>-As<sub>3</sub>)] in the solid state. Hydrogen atoms are omitted for clarity. Thermal ellipsoids are drawn with 50 % probability level. Selected bond lengths [Å] and angles [°]: As1-As2 2.3700(5), As2-As3 2.3821(6), As1-As3 2.3700(6).

## 4.17 Crystallographic information

**Table S1:** Crystallographic data for 3 - 9.

|                                              | 3                                                                                   | 4                                                                                    | 5                                                                                                 | 6                                                                                                  | 7                                                                                                                              |
|----------------------------------------------|-------------------------------------------------------------------------------------|--------------------------------------------------------------------------------------|---------------------------------------------------------------------------------------------------|----------------------------------------------------------------------------------------------------|--------------------------------------------------------------------------------------------------------------------------------|
| CCDC                                         | 2064647                                                                             | 2064648                                                                              | 2064649                                                                                           | 2064650                                                                                            | 2064651                                                                                                                        |
| Formula                                      | AlC <sub>63</sub> CoF <sub>46</sub> FeH <sub>46</sub> O <sub>3</sub> P <sub>5</sub> | AlAs <sub>5</sub> Ce <sub>3</sub> CoF <sub>46</sub> FeH <sub>46</sub> O <sub>3</sub> | C <sub>99</sub> H <sub>44</sub> Al <sub>2</sub> CoF <sub>52</sub> FeO <sub>6</sub> P <sub>5</sub> | Al <sub>2</sub> As <sub>5</sub> C <sub>99</sub> CoF <sub>52</sub> FeH <sub>44</sub> O <sub>6</sub> | C <sub>90</sub> Co <sub>2</sub> Fe <sub>2</sub> H <sub>160</sub> K <sub>2</sub> N <sub>4</sub> O <sub>12</sub> P <sub>10</sub> |
| <i>D</i> <sub>calc</sub> /g cm <sup>-3</sup> | 1.781                                                                               | 1.934                                                                                | 1.834                                                                                             | 1.941                                                                                              | 1.291                                                                                                                          |
| $\mu$ /mm <sup>-1</sup>                      | 6.822                                                                               | 8.031                                                                                | 4.219                                                                                             | 1.622 B                                                                                            | 5.113                                                                                                                          |
| Formula Weight                               | 2231.90                                                                             | 2451.65                                                                              | 3789.27                                                                                           | 4020.00                                                                                            | 2146.45                                                                                                                        |
| Colour                                       | clear dark green                                                                    | clear dark brown                                                                     | clear dark brown                                                                                  | dark brown                                                                                         | clear dark green                                                                                                               |
| Shape                                        | block                                                                               | plate                                                                                | block                                                                                             | block                                                                                              | block                                                                                                                          |
| Size/mm <sup>3</sup>                         | 0.29x0.16x0.10                                                                      | 0.57x0.46x0.18                                                                       | 0.38x0.31x0.21                                                                                    | 0.30x0.22x0.15                                                                                     | 0.42x0.31x0.23                                                                                                                 |
| <i>T</i> /K                                  | 123.00(10)                                                                          | 123                                                                                  | 123.01(10)                                                                                        | 123(1)                                                                                             | 123.0(3)                                                                                                                       |
| Crystal System                               | triclinic                                                                           | triclinic                                                                            | monoclinic                                                                                        | monoclinic                                                                                         | triclinic                                                                                                                      |
| Flack Parameter                              |                                                                                     |                                                                                      | 0.0062(8)                                                                                         | 0.216(4)                                                                                           |                                                                                                                                |
| Hooft Parameter                              |                                                                                     |                                                                                      | 0.0020(6)                                                                                         | 0.249(2)                                                                                           |                                                                                                                                |
| Space Group                                  | <i>P</i> -1                                                                         | <i>P</i> -1                                                                          | <i>P</i> 2 <sub>1</sub>                                                                           | <i>P</i> 2 <sub>1</sub>                                                                            | <i>P</i> -1                                                                                                                    |
| <i>a</i> /Å                                  | 13.4750(3)                                                                          | 13.4946(4)                                                                           | 17.5277(2)                                                                                        | 17.5971(2)                                                                                         | 16.1521(6)                                                                                                                     |
| <i>b</i> /Å                                  | 18.3242(3)                                                                          | 18.4836(4)                                                                           | 19.54690(10)                                                                                      | 19.5391(2)                                                                                         | 17.2031(6)                                                                                                                     |
| <i>c</i> /Å                                  | 19.9317(5)                                                                          | 20.0500(3)                                                                           | 21.7863(2)                                                                                        | 21.7687(3)                                                                                         | 20.0003(6)                                                                                                                     |
| $\alpha$ /°                                  | 116.796(2)                                                                          | 117.102(2)                                                                           | 90                                                                                                | 90                                                                                                 | 86.912(2)                                                                                                                      |
| $\beta$ /°                                   | 104.727(2)                                                                          | 104.793(2)                                                                           | 113.1770(10)                                                                                      | 113.2570(10)                                                                                       | 84.332(3)                                                                                                                      |
| $\gamma$ /°                                  | 93.3840(10)                                                                         | 93.649(2)                                                                            | 90                                                                                                | 90                                                                                                 | 89.021(3)                                                                                                                      |
| <i>V</i> /Å <sup>3</sup>                     | 4161.88(17)                                                                         | 4209.21(18)                                                                          | 6861.84(12)                                                                                       | 6876.57(15)                                                                                        | 5521.8(3)                                                                                                                      |
| <i>Z</i>                                     | 2                                                                                   | 2                                                                                    | 2                                                                                                 | 2                                                                                                  | 2                                                                                                                              |
| <i>Z'</i>                                    | 1                                                                                   | 1                                                                                    | 1                                                                                                 | 1                                                                                                  | 1                                                                                                                              |
| Wavelength/Å                                 | 1.54184                                                                             | 1.54184                                                                              | 1.54184                                                                                           | 0.71073                                                                                            | 1.39222                                                                                                                        |
| Radiation type                               | Cu K $\alpha$                                                                       | Cu K $\alpha$                                                                        | Cu K $\alpha$                                                                                     | MoK $\alpha$                                                                                       | Cu K $\beta$                                                                                                                   |
| $\theta$ <sub>min</sub> /°                   | 3.462                                                                               | 3.464                                                                                | 3.555                                                                                             | 3.271                                                                                              | 3.380                                                                                                                          |
| $\theta$ <sub>max</sub> /°                   | 73.479                                                                              | 72.918                                                                               | 73.712                                                                                            | 32.428                                                                                             | 74.590                                                                                                                         |
| Measured Refl.                               | 46279                                                                               | 25697                                                                                | 78688                                                                                             | 62619                                                                                              | 50007                                                                                                                          |
| Independent Refl.                            | 16041                                                                               | 16118                                                                                | 27038                                                                                             | 39669                                                                                              | 29142                                                                                                                          |
| Reflections with <i>I</i> > 2( <i>I</i> )    | 14851                                                                               | 14021                                                                                | 26513                                                                                             | 34588                                                                                              | 21916                                                                                                                          |
| <i>R</i> <sub>int</sub>                      | 0.0289                                                                              | 0.0361                                                                               | 0.0236                                                                                            | 0.0255                                                                                             | 0.0415                                                                                                                         |
| Parameters                                   | 1095                                                                                | 1095                                                                                 | 2221                                                                                              | 1942                                                                                               | 2134                                                                                                                           |
| Restraints                                   | 0                                                                                   | 0                                                                                    | 297                                                                                               | 1                                                                                                  | 527                                                                                                                            |
| Largest Peak                                 | 0.428                                                                               | 1.403                                                                                | 0.583                                                                                             | 0.523                                                                                              | 0.701                                                                                                                          |
| Deepest Hole                                 | -0.312                                                                              | -0.889                                                                               | -0.326                                                                                            | -0.358                                                                                             | -0.668                                                                                                                         |
| Goof                                         | 1.018                                                                               | 1.038                                                                                | 1.053                                                                                             | 0.995                                                                                              | 1.021                                                                                                                          |
| <i>wR</i> <sub>2</sub> (all data)            | 0.0929                                                                              | 0.1439                                                                               | 0.0721                                                                                            | 0.0830                                                                                             | 0.1490                                                                                                                         |
| <i>wR</i> <sub>2</sub>                       | 0.0909                                                                              | 0.1382                                                                               | 0.0716                                                                                            | 0.0790                                                                                             | 0.1327                                                                                                                         |
| <i>R</i> <sub>1</sub> (all data)             | 0.0390                                                                              | 0.0577                                                                               | 0.0271                                                                                            | 0.0477                                                                                             | 0.0725                                                                                                                         |
| <i>R</i> <sub>1</sub>                        | 0.0360                                                                              | 0.0516                                                                               | 0.0265                                                                                            | 0.0392                                                                                             | 0.0541                                                                                                                         |

**Table S2:** Crystallographic data for **9 - 19**.

|                                               | 9                                                                                  | 11                                                   | 15                                                                                                | 16                                                                                                                   | 17                                                                                               | 18                                                 |
|-----------------------------------------------|------------------------------------------------------------------------------------|------------------------------------------------------|---------------------------------------------------------------------------------------------------|----------------------------------------------------------------------------------------------------------------------|--------------------------------------------------------------------------------------------------|----------------------------------------------------|
| CCDC                                          | 2064652                                                                            | 2064653                                              | 2064654                                                                                           | 2064655                                                                                                              | 2064656                                                                                          | 2064657                                            |
| Formula                                       | C <sub>48</sub> H <sub>80</sub> As <sub>5</sub> CoFeKN <sub>2</sub> O <sub>6</sub> | C <sub>34</sub> H <sub>58</sub> As <sub>3</sub> CoNi | C <sub>70</sub> H <sub>158</sub> O <sub>3</sub> F <sub>46</sub> AlNi <sub>2</sub> As <sub>3</sub> | C <sub>77.7</sub> H <sub>168</sub> AlCl <sub>2.8</sub> Co <sub>2</sub> F <sub>46</sub> O <sub>3</sub> P <sub>3</sub> | C <sub>82</sub> H <sub>66</sub> AlAs <sub>3</sub> Co <sub>2</sub> F <sub>50</sub> O <sub>3</sub> | C <sub>30</sub> H <sub>50</sub> CoNiP <sub>3</sub> |
| <i>D</i> <sub>calc</sub> / g cm <sup>-3</sup> | 1.633                                                                              | 1.500                                                | 1.850                                                                                             | 1.672                                                                                                                | 1.824                                                                                            | 1.311                                              |
| $\mu$ /mm <sup>-1</sup>                       | 4.279                                                                              | 7.492                                                | 3.549                                                                                             | 5.567                                                                                                                | 5.728                                                                                            | 6.423                                              |
| Formula Weight                                | 1348.51                                                                            | 809.20                                               | 2190.32                                                                                           | 2260.73                                                                                                              | 2418.94                                                                                          | 621.25                                             |
| Colour                                        | clear dark brown                                                                   | clear dark brown                                     | clear dark orange                                                                                 | red                                                                                                                  | clear dark brown                                                                                 | clear dark brown                                   |
| Shape                                         | plate                                                                              | block                                                | block                                                                                             | block                                                                                                                | block                                                                                            | plate                                              |
| Size/mm <sup>3</sup>                          | 0.53x0.23x0.06                                                                     | 0.17x0.09x0.06                                       | 0.48x0.40x0.22                                                                                    | 0.35x0.13x0.07                                                                                                       | 0.12x0.07x0.06                                                                                   | 0.22x0.13x0.03                                     |
| <i>T</i> /K                                   | 123(1)                                                                             | 122.99(10)                                           | 123                                                                                               | 122.94(19)                                                                                                           | 100.00(10)                                                                                       | 123.01(10)                                         |
| Crystal System                                | triclinic                                                                          | triclinic                                            | triclinic                                                                                         | monoclinic                                                                                                           | monoclinic                                                                                       | monoclinic                                         |
| Space Group                                   | <i>P</i> -1                                                                        | <i>P</i> -1                                          | <i>P</i> -1                                                                                       | <i>P</i> 2 <sub>1</sub> / <i>c</i>                                                                                   | <i>P</i> 2 <sub>1</sub> / <i>c</i>                                                               | <i>P</i> 2 <sub>1</sub> / <i>n</i>                 |
| <i>a</i> /Å                                   | 10.4742(2)                                                                         | 12.3686(4)                                           | 14.3245(4)                                                                                        | 16.96980(10)                                                                                                         | 17.4140(4)                                                                                       | 18.1357(2)                                         |
| <i>b</i> /Å                                   | 13.8238(4)                                                                         | 12.8206(6)                                           | 17.2360(5)                                                                                        | 19.9741(2)                                                                                                           | 20.5608(3)                                                                                       | 9.64220(10)                                        |
| <i>c</i> /Å                                   | 19.3001(4)                                                                         | 13.3202(5)                                           | 19.5299(5)                                                                                        | 26.6848(3)                                                                                                           | 25.1613(6)                                                                                       | 18.7312(3)                                         |
| <i>a</i> '                                    | 91.715(2)                                                                          | 66.380(4)                                            | 99.648(2)                                                                                         | 90                                                                                                                   | 90                                                                                               | 90                                                 |
| $\beta$ '                                     | 100.138(2)                                                                         | 71.427(3)                                            | 109.149(2)                                                                                        | 96.8420(10)                                                                                                          | 102.166(2)                                                                                       | 106.1070(10)                                       |
| $\gamma$ '                                    | 93.830(2)                                                                          | 71.715(4)                                            | 113.282(3)                                                                                        | 90                                                                                                                   | 90                                                                                               | 90                                                 |
| <i>V</i> /Å <sup>3</sup>                      | 2742.27(11)                                                                        | 1791.86(14)                                          | 3931.0(2)                                                                                         | 8980.57(15)                                                                                                          | 8806.6(3)                                                                                        | 3146.91(7)                                         |
| <i>Z</i>                                      | 2                                                                                  | 2                                                    | 2                                                                                                 | 4                                                                                                                    | 4                                                                                                | 4                                                  |
| <i>Z</i> '                                    | 1                                                                                  | 1                                                    | 1                                                                                                 | 1                                                                                                                    | 1                                                                                                | 1                                                  |
| Wavelength/Å                                  | 0.71073                                                                            | 1.54184                                              | 1.54184                                                                                           | 1.54184                                                                                                              | 1.54184                                                                                          | 1.54184                                            |
| Radiation type                                | Mo K $\alpha$                                                                      | Cu K $\alpha$                                        | Cu K $\alpha$                                                                                     | Cu K $\alpha$                                                                                                        | Cu K $\alpha$                                                                                    | Cu K $\alpha$                                      |
| $\theta_{min}$ '                              | 3.437                                                                              | 3.714                                                | 3.469                                                                                             | 3.432                                                                                                                | 2.596                                                                                            | 3.991                                              |
| $\theta_{max}$ '                              | 32.387                                                                             | 73.656                                               | 72.120                                                                                            | 73.512                                                                                                               | 73.168                                                                                           | 74.215                                             |
| Measured Refl.                                | 26611                                                                              | 11640                                                | 31525                                                                                             | 75562                                                                                                                | 47673                                                                                            | 11930                                              |
| Independent Refl.                             | 17246                                                                              | 6881                                                 | 14915                                                                                             | 17763                                                                                                                | 16761                                                                                            | 6138                                               |
| Reflections with <i>I</i> > 2( <i>I</i> )     | 13244                                                                              | 5709                                                 | 13757                                                                                             | 16418                                                                                                                | 14230                                                                                            | 4997                                               |
| <i>R</i> <sub>int</sub>                       | 0.0369                                                                             | 0.0163                                               | 0.0290                                                                                            | 0.0439                                                                                                               | 0.0290                                                                                           | 0.0235                                             |
| Parameters                                    | 573                                                                                | 388                                                  | 1144                                                                                              | 1326                                                                                                                 | 1432                                                                                             | 331                                                |
| Restraints                                    | 0                                                                                  | 0                                                    | 0                                                                                                 | 108                                                                                                                  | 545                                                                                              | 0                                                  |
| Largest Peak                                  | 1.535                                                                              | 0.274                                                | 1.017                                                                                             | 0.734                                                                                                                | 0.689                                                                                            | 0.470                                              |
| Deepest Hole                                  | -2.036                                                                             | -0.293                                               | -0.642                                                                                            | -0.450                                                                                                               | -0.698                                                                                           | -0.261                                             |
| Goof                                          | 1.031                                                                              | 0.881                                                | 1.045                                                                                             | 1.086                                                                                                                | 1.062                                                                                            | 0.920                                              |
| <i>wR</i> <sub>2</sub> (all data)             | 0.1349                                                                             | 0.0395                                               | 0.0881                                                                                            | 0.1147                                                                                                               | 0.0966                                                                                           | 0.0551                                             |
| <i>wR</i> <sub>2</sub>                        | 0.1207                                                                             | 0.0390                                               | 0.0856                                                                                            | 0.1123                                                                                                               | 0.0929                                                                                           | 0.0544                                             |
| <i>R</i> <sub>1</sub> (all data)              | 0.0718                                                                             | 0.0226                                               | 0.0367                                                                                            | 0.0482                                                                                                               | 0.0437                                                                                           | 0.0317                                             |
| <i>R</i> <sub>1</sub>                         | 0.0518                                                                             | 0.0180                                               | 0.0336                                                                                            | 0.0446                                                                                                               | 0.0354                                                                                           | 0.0252                                             |

**Table S3:** Crystallographic data for **20** and **21**.

|                                               | 19                                                                                                          | 21                                                                                                    | 22                                                                                | 23                                                                                 | [Cp <sup>III</sup> Ni(η <sup>3</sup> -As <sub>3</sub> )] |
|-----------------------------------------------|-------------------------------------------------------------------------------------------------------------|-------------------------------------------------------------------------------------------------------|-----------------------------------------------------------------------------------|------------------------------------------------------------------------------------|----------------------------------------------------------|
| CCDC                                          | 2064658                                                                                                     | 2064659                                                                                               | 2064660                                                                           | 2064661                                                                            | 2064662                                                  |
| Formula                                       | C <sub>68.4</sub> H <sub>54.8</sub> AgAlCl <sub>4.8</sub> CoF <sub>46</sub> NiO <sub>3</sub> P <sub>3</sub> | C <sub>76</sub> H <sub>60</sub> AlCl <sub>2</sub> CoF <sub>46</sub> NiO <sub>3</sub> P <sub>3</sub> W | C <sub>52</sub> H <sub>54</sub> CoKN <sub>2</sub> NiO <sub>3</sub> P <sub>3</sub> | C <sub>52</sub> H <sub>54</sub> As <sub>3</sub> CoKN <sub>2</sub> NiO <sub>3</sub> | C <sub>17</sub> H <sub>29</sub> As <sub>3</sub> Ni       |
| <i>D</i> <sub>calc</sub> / g cm <sup>-3</sup> | 1.819                                                                                                       | 1.880                                                                                                 | 1.241                                                                             | 1.383                                                                              | 1.771                                                    |
| $\mu$ /mm <sup>-1</sup>                       | 1.010                                                                                                       | 6.698                                                                                                 | 4.385                                                                             | 5.462                                                                              | 7.052                                                    |
| Formula                                       | 2314.28                                                                                                     | 2467.52                                                                                               | 1092.94                                                                           | 1224.79                                                                            | 516.87                                                   |
| Weight                                        |                                                                                                             |                                                                                                       |                                                                                   |                                                                                    |                                                          |
| Colour                                        | dark brown                                                                                                  | clear dark brown                                                                                      | clear light brown                                                                 | clear dark brown                                                                   | clear intense red                                        |
| Shape                                         | block                                                                                                       | block                                                                                                 | plate                                                                             | block                                                                              | plate                                                    |
| Size/mm <sup>3</sup>                          | 0.48×0.28×0.18                                                                                              | 0.31×0.13×0.11                                                                                        | 0.46×0.24×0.07                                                                    | 0.22×0.16×0.15                                                                     | 0.48×0.31×0.23                                           |
| <i>T</i> /K                                   | 123(1)                                                                                                      | 100.00(10)                                                                                            | 100.01(10)                                                                        | 122.97(11)                                                                         | 123.00(10)                                               |
| Crystal System                                | monoclinic                                                                                                  | triclinic                                                                                             | triclinic                                                                         | triclinic                                                                          | monoclinic                                               |
| Space Group                                   | <i>C2/c</i>                                                                                                 | <i>P</i> -1                                                                                           | <i>P</i> -1                                                                       | <i>P</i> -1                                                                        | <i>P2<sub>1</sub>/c</i>                                  |
| <i>a</i> /Å                                   | 28.8667(4)                                                                                                  | 11.60730(10)                                                                                          | 10.70820(10)                                                                      | 10.6876(3)                                                                         | 9.3497(2)                                                |
| <i>b</i> /Å                                   | 19.18723(19)                                                                                                | 17.9579(2)                                                                                            | 13.4327(3)                                                                        | 13.4382(3)                                                                         | 14.6749(2)                                               |
| <i>c</i> /Å                                   | 34.0000(5)                                                                                                  | 21.1425(2)                                                                                            | 21.0766(4)                                                                        | 21.1997(4)                                                                         | 14.6948(2)                                               |
| $\alpha$ /°                                   | 90                                                                                                          | 93.3120(10)                                                                                           | 99.596(2)                                                                         | 99.356(2)                                                                          | 90                                                       |
| $\beta$ /°                                    | 116.1848(17)                                                                                                | 91.8540(10)                                                                                           | 101.7700(10)                                                                      | 101.402(2)                                                                         | 105.950(2)                                               |
| $\gamma$ /°                                   | 90                                                                                                          | 97.3480(10)                                                                                           | 90.2540(10)                                                                       | 90.819(2)                                                                          | 90                                                       |
| <i>V</i> /Å <sup>3</sup>                      | 16899.1(4)                                                                                                  | 4359.99(7)                                                                                            | 2924.07(9)                                                                        | 2941.56(12)                                                                        | 1938.59(6)                                               |
| <i>Z</i>                                      | 8                                                                                                           | 2                                                                                                     | 2                                                                                 | 2                                                                                  | 4                                                        |
| <i>Z'</i>                                     | 1                                                                                                           | 1                                                                                                     | 1                                                                                 | 1                                                                                  | 1                                                        |
| Wavelength/Å                                  | 0.71073                                                                                                     | 1.54184                                                                                               | 1.54184                                                                           | 1.54184                                                                            | 1.54184                                                  |
| Radiation type                                | Mo K $\alpha$                                                                                               | Cu K $\alpha$                                                                                         | Cu K $\alpha$                                                                     | Cu K $\alpha$                                                                      | Cu K $\alpha$                                            |
| $\theta_{min}$ /°                             | 3.300                                                                                                       | 2.095                                                                                                 | 2.173                                                                             | 3.337                                                                              | 4.344                                                    |
| $\theta_{max}$ /°                             | 29.130                                                                                                      | 73.327                                                                                                | 74.145                                                                            | 73.859                                                                             | 73.918                                                   |
| Measured Refl.                                | 78063                                                                                                       | 48178                                                                                                 | 31913                                                                             | 33005                                                                              | 10592                                                    |
| Independent Refl.                             | 22718                                                                                                       | 16705                                                                                                 | 11046                                                                             | 11593                                                                              | 3859                                                     |
| Reflections with <i>I</i> > 2( <i>I</i> )     | 19528                                                                                                       | 16192                                                                                                 | 10007                                                                             | 9588                                                                               | 3810                                                     |
| <i>R</i> <sub>int</sub>                       | 0.0200                                                                                                      | 0.0341                                                                                                | 0.0210                                                                            | 0.0262                                                                             | 0.0445                                                   |
| Parameters                                    | 1214                                                                                                        | 1288                                                                                                  | 640                                                                               | 646                                                                                | 199                                                      |
| Restraints                                    | 37                                                                                                          | 0                                                                                                     | 0                                                                                 | 8                                                                                  | 0                                                        |
| Largest Peak                                  | 2.363                                                                                                       | 1.354                                                                                                 | 0.693                                                                             | 0.474                                                                              | 1.370                                                    |
| Deepest Hole                                  | -0.979                                                                                                      | -1.757                                                                                                | -0.595                                                                            | -0.483                                                                             | -0.780                                                   |
| Goof                                          | 1.039                                                                                                       | 1.090                                                                                                 | 1.078                                                                             | 0.928                                                                              | 1.100                                                    |
| <i>wR</i> <sub>2</sub> (all data)             | 0.1285                                                                                                      | 0.1044                                                                                                | 0.0987                                                                            | 0.0629                                                                             | 0.1387                                                   |
| <i>wR</i> <sub>2</sub>                        | 0.1230                                                                                                      | 0.1036                                                                                                | 0.0967                                                                            | 0.0619                                                                             | 0.1380                                                   |
| <i>R</i> <sub>1</sub> (all data)              | 0.0527                                                                                                      | 0.0398                                                                                                | 0.0410                                                                            | 0.0314                                                                             | 0.0474                                                   |
| <i>R</i> <sub>1</sub>                         | 0.0449                                                                                                      | 0.0387                                                                                                | 0.0373                                                                            | 0.0255                                                                             | 0.0468                                                   |



## 5. Computational Details

Gaussian 09 program<sup>[6]</sup> was used throughout. Density functional theory (DFT) in form of or BP86<sup>[7]</sup> (Becke's exchange and Perdew 86 correlation functional) with def2-TZVP all electron basis set was employed. For solvents effects has been accounted by using continuous polarizable continuum model (CPM).<sup>[8]</sup> The dielectric constant of dichloromethane ( $\epsilon = 8.93$ ) has been used in the calculations of the cations (**3**, **4**, **5**, **6**, **12-bent**, **12-linear**, **13-bent**, **13-linear**, **14**, **15**, **16**, **17**, **19**, **21**) and the dielectric constant of thf ( $\epsilon = 7.4257$ ) has been used in the calculations of the anions (**7**, **8**, **9**, **22**, **23**, **24**, **25**, **26**, **27**). The Natural Bond Orbital (NBO) analysis has been performed with the NBO6 program.<sup>[9]</sup> The long range dispersion correction GD3BJ was applied.<sup>[10]</sup> The figures for the supporting information concerning the DFT calculations were created with Chemcraft<sup>[11]</sup> and concerning the energetic schemata with OLEX2.<sup>[5]</sup>

**Table S4:** Total energies for all optimized geometries (BP86/def2-TZVP level of theory).

|                                                                                             | total energy [Ha] |
|---------------------------------------------------------------------------------------------|-------------------|
| <b>1</b> [(Cp*Fe)(Cp'''Co)( $\mu, \eta^5: \eta^5$ -P <sub>5</sub> )]                        | -5410.19002426    |
| <b>2</b> [(Cp*Fe)(Cp'''Co)( $\mu, \eta^5: \eta^5$ -As <sub>5</sub> )]                       | -14884.0016082    |
| <b>3</b> [(Cp*Fe)(Cp'''Co)( $\mu, \eta^5: \eta^5$ -P <sub>5</sub> ) <sup>+</sup>            | -5410.03741142    |
| <b>4</b> [(Cp*Fe)(Cp'''Co)( $\mu, \eta^5: \eta^5$ -As <sub>5</sub> ) <sup>+</sup>           | -14883.8485530    |
| <b>5</b> [(Cp*Fe)(Cp'''Co)( $\mu, \eta^5: \eta^5$ -P <sub>5</sub> ) <sup>2+</sup>           | -5409.85428357    |
| <b>6</b> [(Cp*Fe)(Cp'''Co)( $\mu, \eta^5: \eta^5$ -As <sub>5</sub> ) <sup>2+</sup>          | -14883.6731821    |
| <b>7</b> [(Cp*Fe)(Cp'''Co)( $\mu, \eta^4: \eta^3$ -P <sub>5</sub> ) <sup>-</sup>            | -5410.29374369    |
| <b>8</b> [(Cp*Fe)(Cp'''Co)( $\mu, \eta^4: \eta^3$ -As <sub>5</sub> ) <sup>-</sup>           | -14884.1104474    |
| <b>9</b> [(Cp*Fe)(Cp'''Co)( $\mu, \eta^4: \eta^4$ -As <sub>6</sub> ) <sup>-</sup>           | -17120.3321848    |
| <b>10</b> [(Cp'''Co)(Cp'''Ni)( $\mu, \eta^3: \eta^3$ -P <sub>3</sub> )]                     | -5247.23890479    |
| <b>10-I</b> [(Cp'''Co)(Cp'''Ni)( $\mu, \eta^3: \eta^2$ -P <sub>3</sub> )] (bent)            | -5247.25107762    |
| <b>11</b> [(Cp'''Co)(Cp'''Ni)( $\mu, \eta^3: \eta^3$ -As <sub>3</sub> )]                    | -10931.5360793    |
| <b>12-bent</b> [(Cp'''Co)(Cp'''Ni)( $\mu, \eta^3: \eta^3$ -P <sub>3</sub> ) <sup>+</sup>    | -5247.08120128    |
| <b>12-linear</b> [(Cp'''Co)(Cp'''Ni)( $\mu, \eta^3: \eta^3$ -P <sub>3</sub> ) <sup>+</sup>  | -5247.07345366    |
| <b>13-bent</b> [(Cp'''Co)(Cp'''Ni)( $\mu, \eta^3: \eta^3$ -As <sub>3</sub> ) <sup>+</sup>   | -10931.3763388    |
| <b>13-linear</b> [(Cp'''Co)(Cp'''Ni)( $\mu, \eta^3: \eta^3$ -As <sub>3</sub> ) <sup>+</sup> | -10931.3750215    |
| <b>14</b> [(Cp'''Ni) <sub>2</sub> ( $\mu, \eta^3: \eta^3$ -P <sub>3</sub> ) <sup>+</sup>    | -5372.64435099    |
| <b>15</b> [(Cp'''Ni) <sub>2</sub> ( $\mu, \eta^3: \eta^3$ -As <sub>3</sub> ) <sup>+</sup>   | -11056.9475006    |
| <b>16</b> [(Cp'''Co) <sub>2</sub> ( $\mu, \eta^3: \eta^3$ -P <sub>3</sub> ) <sup>+</sup>    | -5121.53892363    |
| <b>17</b> [(Cp'''Co) <sub>2</sub> ( $\mu, \eta^3: \eta^3$ -As <sub>3</sub> ) <sup>+</sup>   | -10805.8307017    |
| <b>18</b> [(Cp'''Co)(Cp'''Ni)( $\mu, \eta^3: \eta^2$ -P <sub>3</sub> )]                     | -5089.93874216    |
| <b>18-I</b> [(Cp'''Co)(Cp'''Ni)( $\mu, \eta^3: \eta^3$ -P <sub>3</sub> )] (linear)          | -5089.92600098    |

|                                                                                                                                                                                                                |                |
|----------------------------------------------------------------------------------------------------------------------------------------------------------------------------------------------------------------|----------------|
| <b>19</b> [(Cp <sup>'''</sup> Co)(Cp <sup>'''</sup> Ni)(μ <sub>4</sub> ,η <sup>3</sup> :η <sup>2</sup> :η <sup>1</sup> :η <sup>1</sup> -P <sub>3</sub> ){Ag(CH <sub>2</sub> Cl <sub>2</sub> )}]₂ <sup>2+</sup> | -12388.8868048 |
| <b>20</b> [(Cp <sup>'''</sup> Co)(Cp <sup>'''</sup> Ni)(μ <sub>3</sub> ,η <sup>3</sup> :η <sup>2</sup> :η <sup>1</sup> -P <sub>3</sub> ){W(CO <sub>5</sub> )}]                                                 | -5877.76924900 |
| <b>21</b> [(Cp <sup>'''</sup> Co)(Cp <sup>'''</sup> Ni)(μ <sub>3</sub> ,η <sup>3</sup> :η <sup>2</sup> :η <sup>1</sup> -P <sub>3</sub> ){W(CO <sub>5</sub> )}] <sup>+</sup>                                    | -5881.60679031 |
| <b>22</b> [(Cp <sup>'''</sup> Co)(Cp <sup>'''</sup> Ni)(μ,η <sup>3</sup> :η <sup>3</sup> -P <sub>3</sub> )] <sup>-</sup>                                                                                       | -5247.34366753 |
| <b>23</b> [(Cp <sup>'''</sup> Co)(Cp <sup>'''</sup> Ni)(μ,η <sup>3</sup> :η <sup>3</sup> -As <sub>3</sub> )] <sup>-</sup>                                                                                      | -10931.6388229 |
| <b>24</b> [(Cp <sup>'''</sup> Ni) <sub>2</sub> (μ,η <sup>3</sup> :η <sup>3</sup> -P <sub>3</sub> )] <sup>-</sup>                                                                                               | -5372.91636772 |
| <b>25</b> [(Cp <sup>'''</sup> Ni) <sub>2</sub> (μ,η <sup>3</sup> :η <sup>3</sup> -As <sub>3</sub> )] <sup>-</sup>                                                                                              | -11057.2109513 |
| <b>26</b> [(Cp <sup>'''</sup> Co) <sub>2</sub> (μ,η <sup>3</sup> :η <sup>3</sup> -P <sub>3</sub> )] <sup>-</sup>                                                                                               | -5121.78815045 |
| <b>27</b> [(Cp <sup>'''</sup> Co) <sub>2</sub> (μ,η <sup>3</sup> :η <sup>3</sup> -As <sub>3</sub> )] <sup>-</sup>                                                                                              | -10806.0801740 |

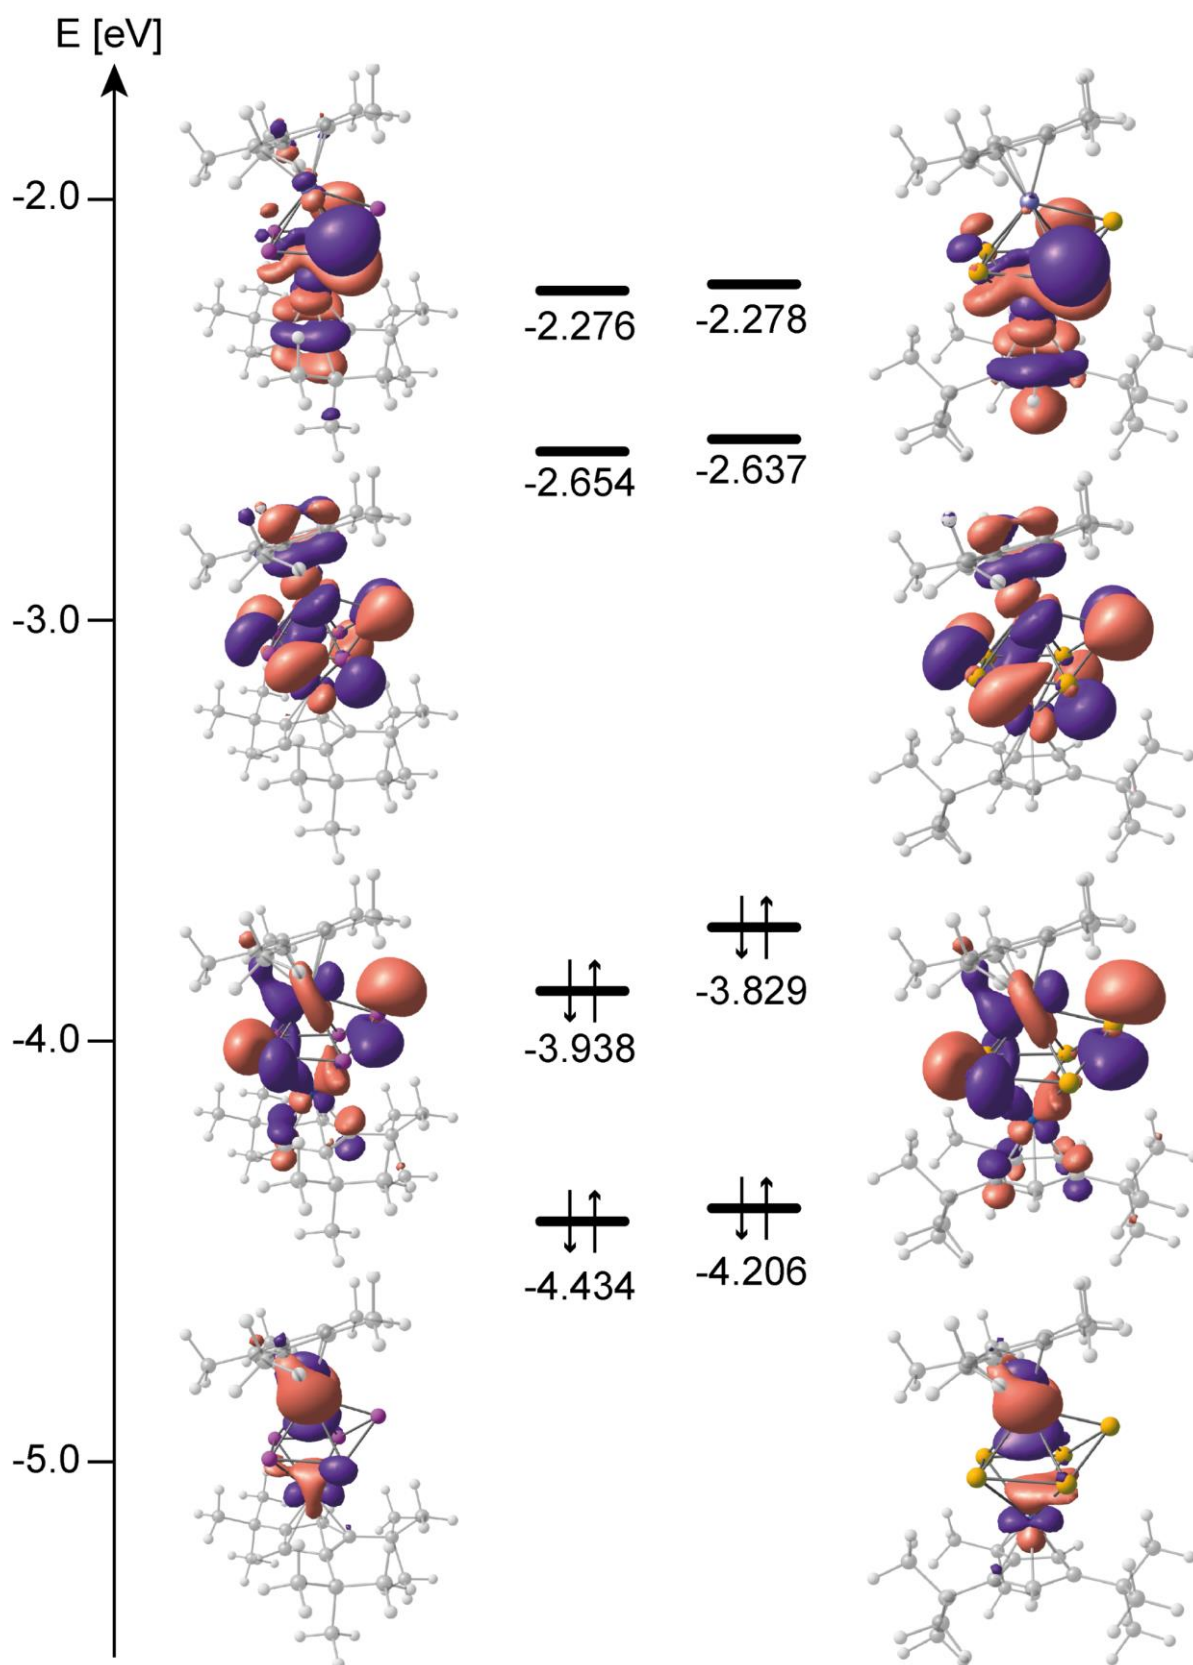

**Figure S80.** Frontier molecular orbitals of **1** (left) and **2** (right) at the BP86/def2-TZVP level of theory.

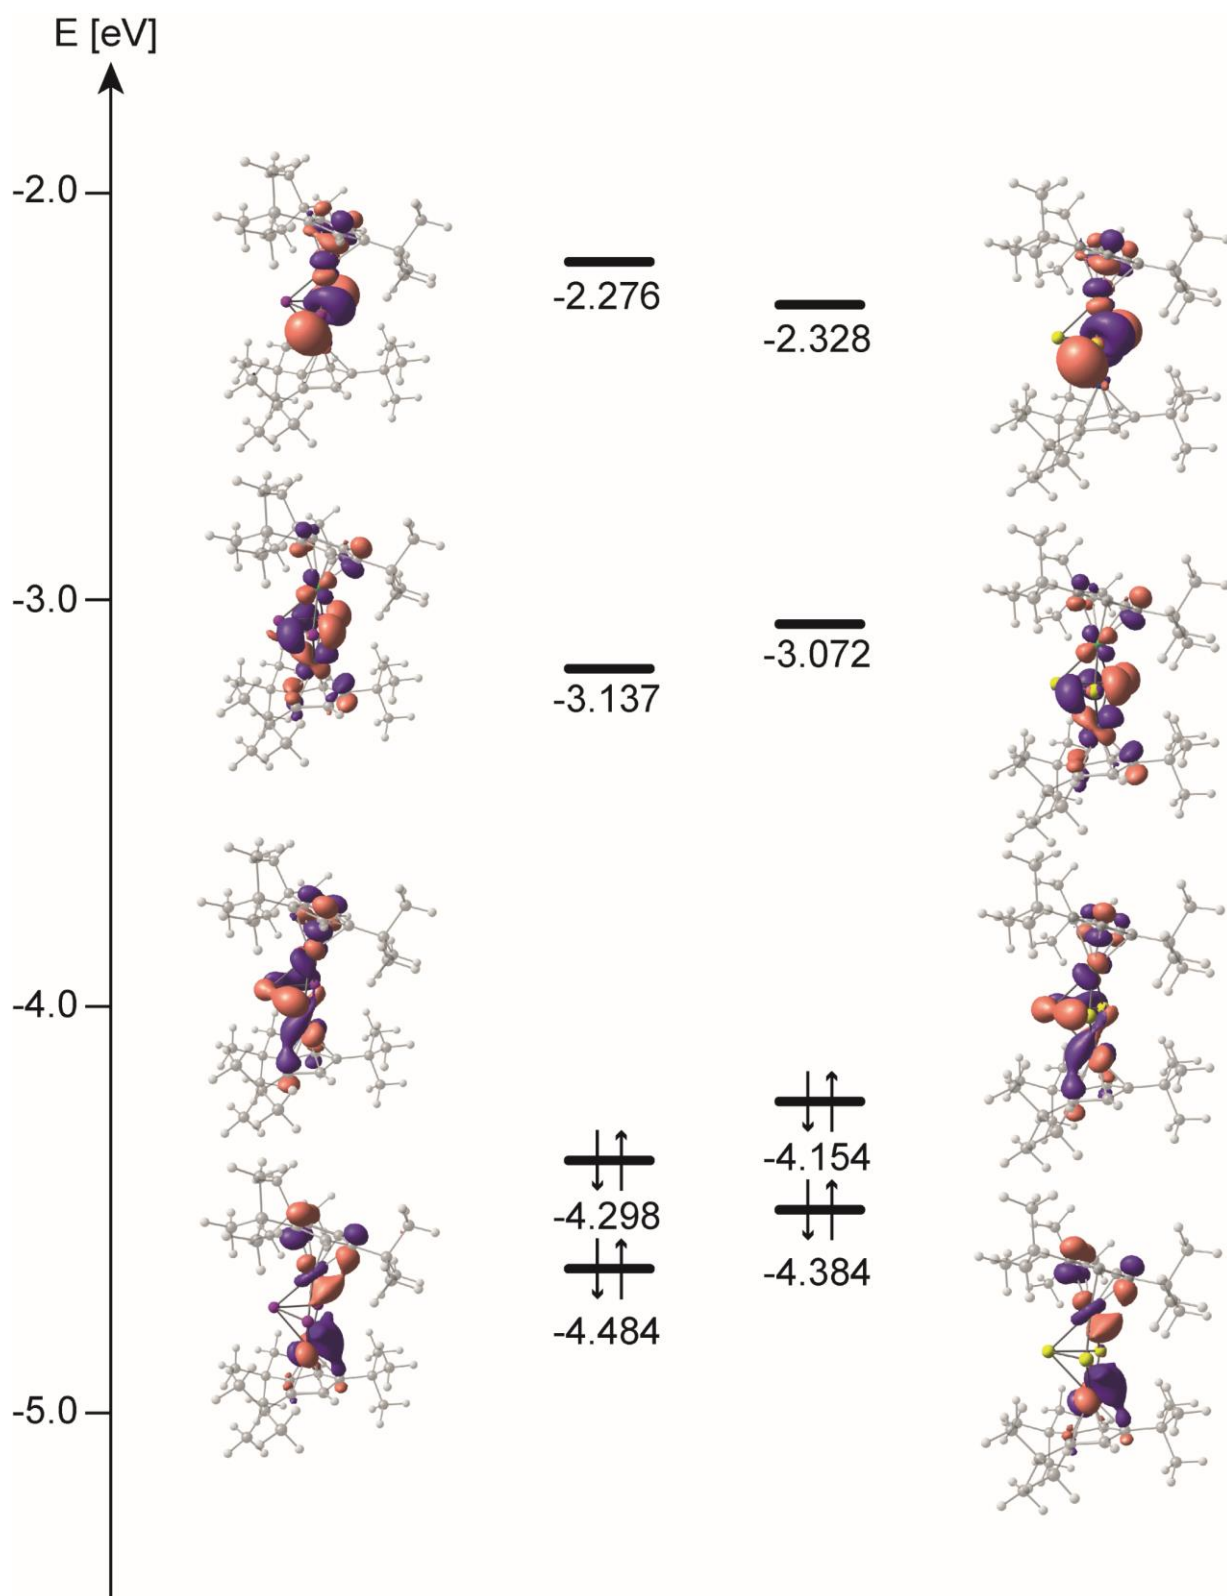

**Figure S81.** Frontier molecular orbitals of **10** (left) and **11** (right) at the BP86/def2-TZVP level of theory.

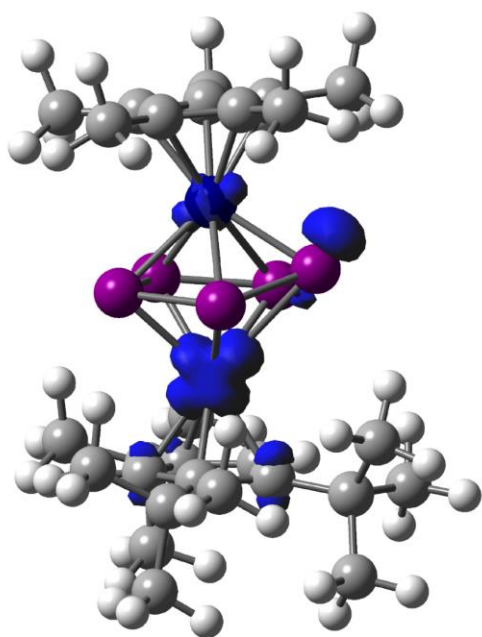

3

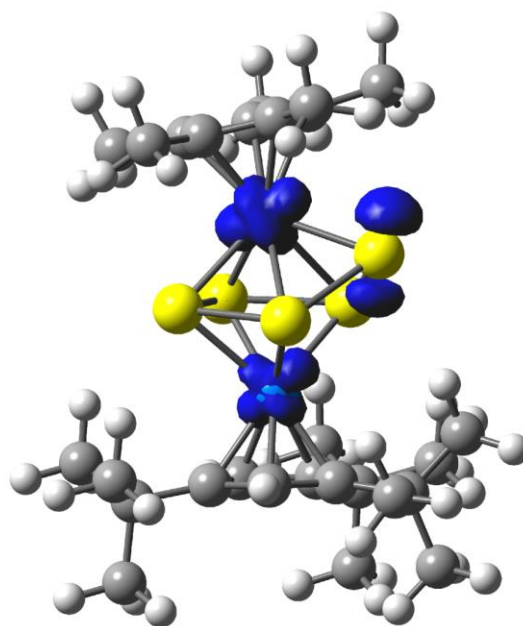

4

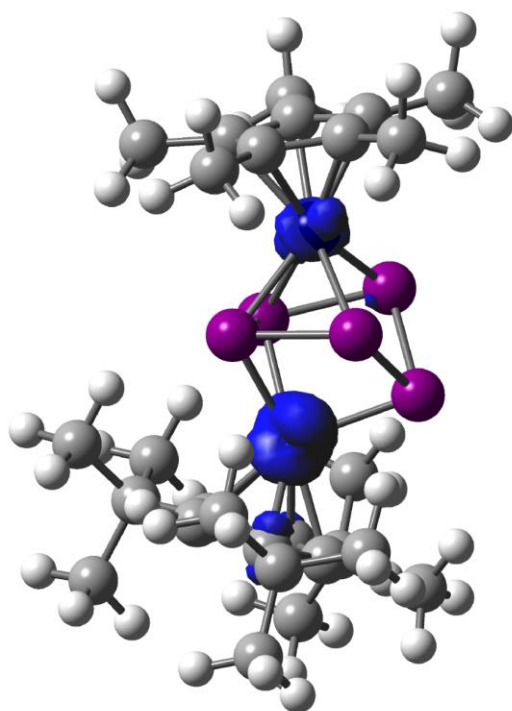

7

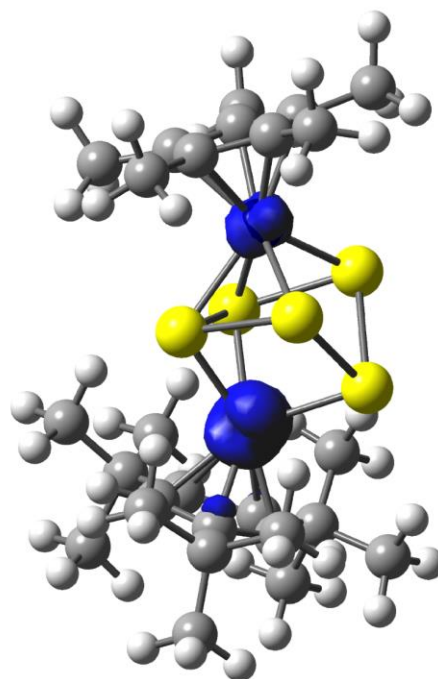

8

**Figure S82:** Isosurfaces of the calculated spin density in **3**, **4**, **7** and **8**, BP86/def2-TZVP level of theory.

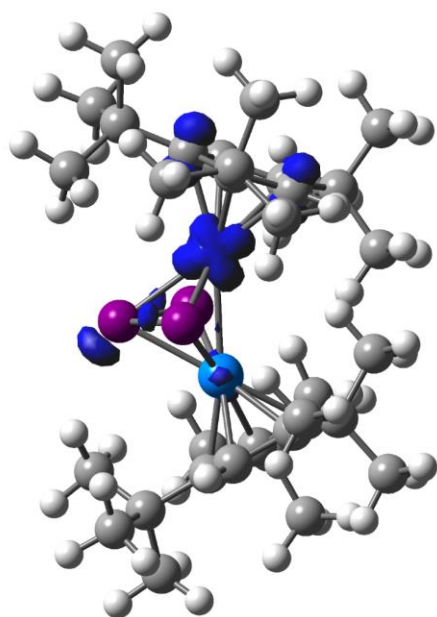

**12-bent**

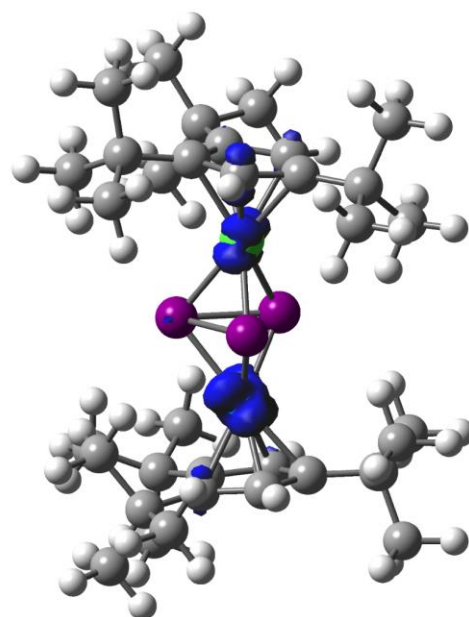

**12-linear**

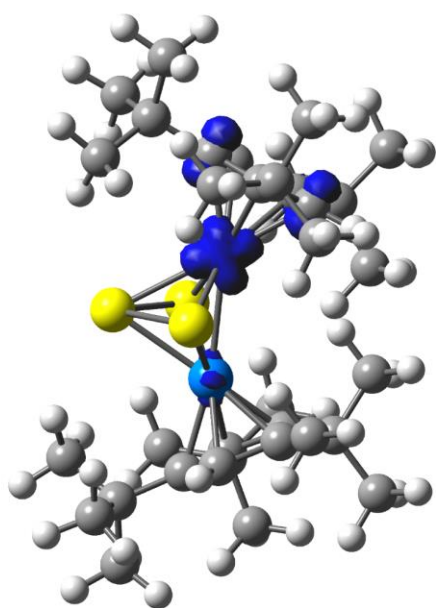

**13-bent**

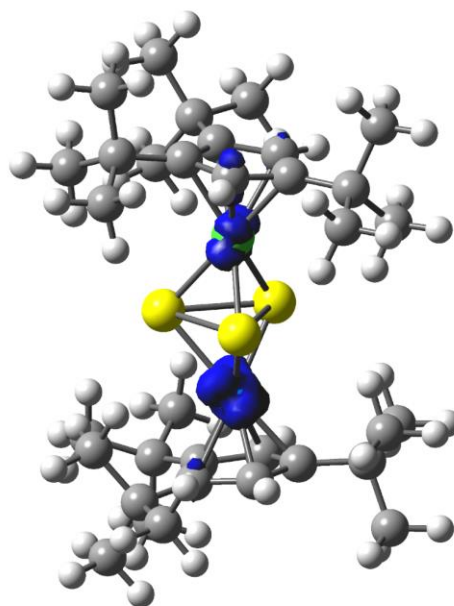

**13-linear**

**Figure S83:** Isosurfaces of the calculated spin density in **12-bent**, **12-linear**, **13-bent** and **13-linear**, BP86/def2-TZVP level of theory.



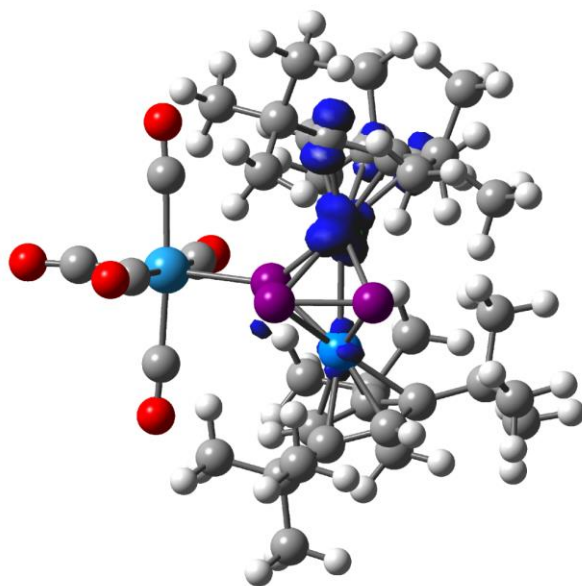

21

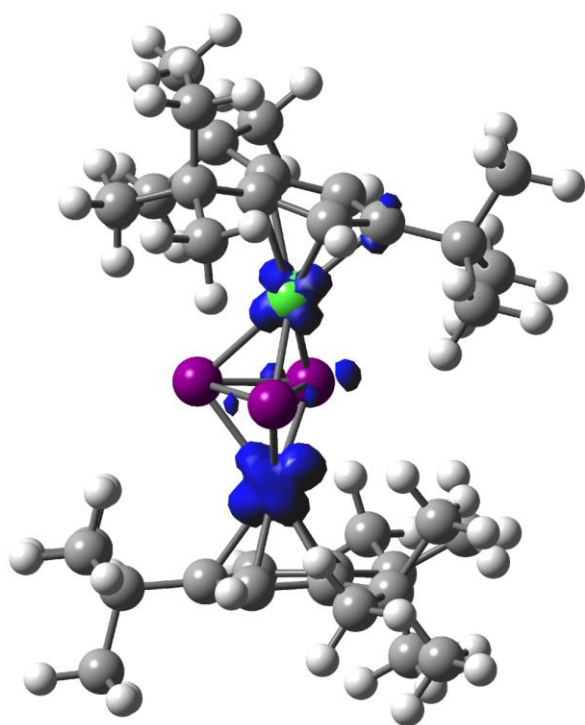

22

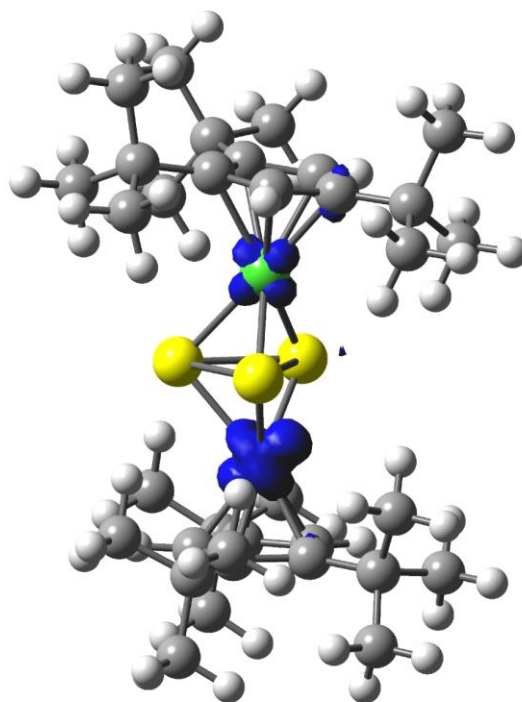

23

Figure S84: Isosurfaces of the calculated spin density in 21, 22 and 23, BP86/def2-TZVP level of theory.

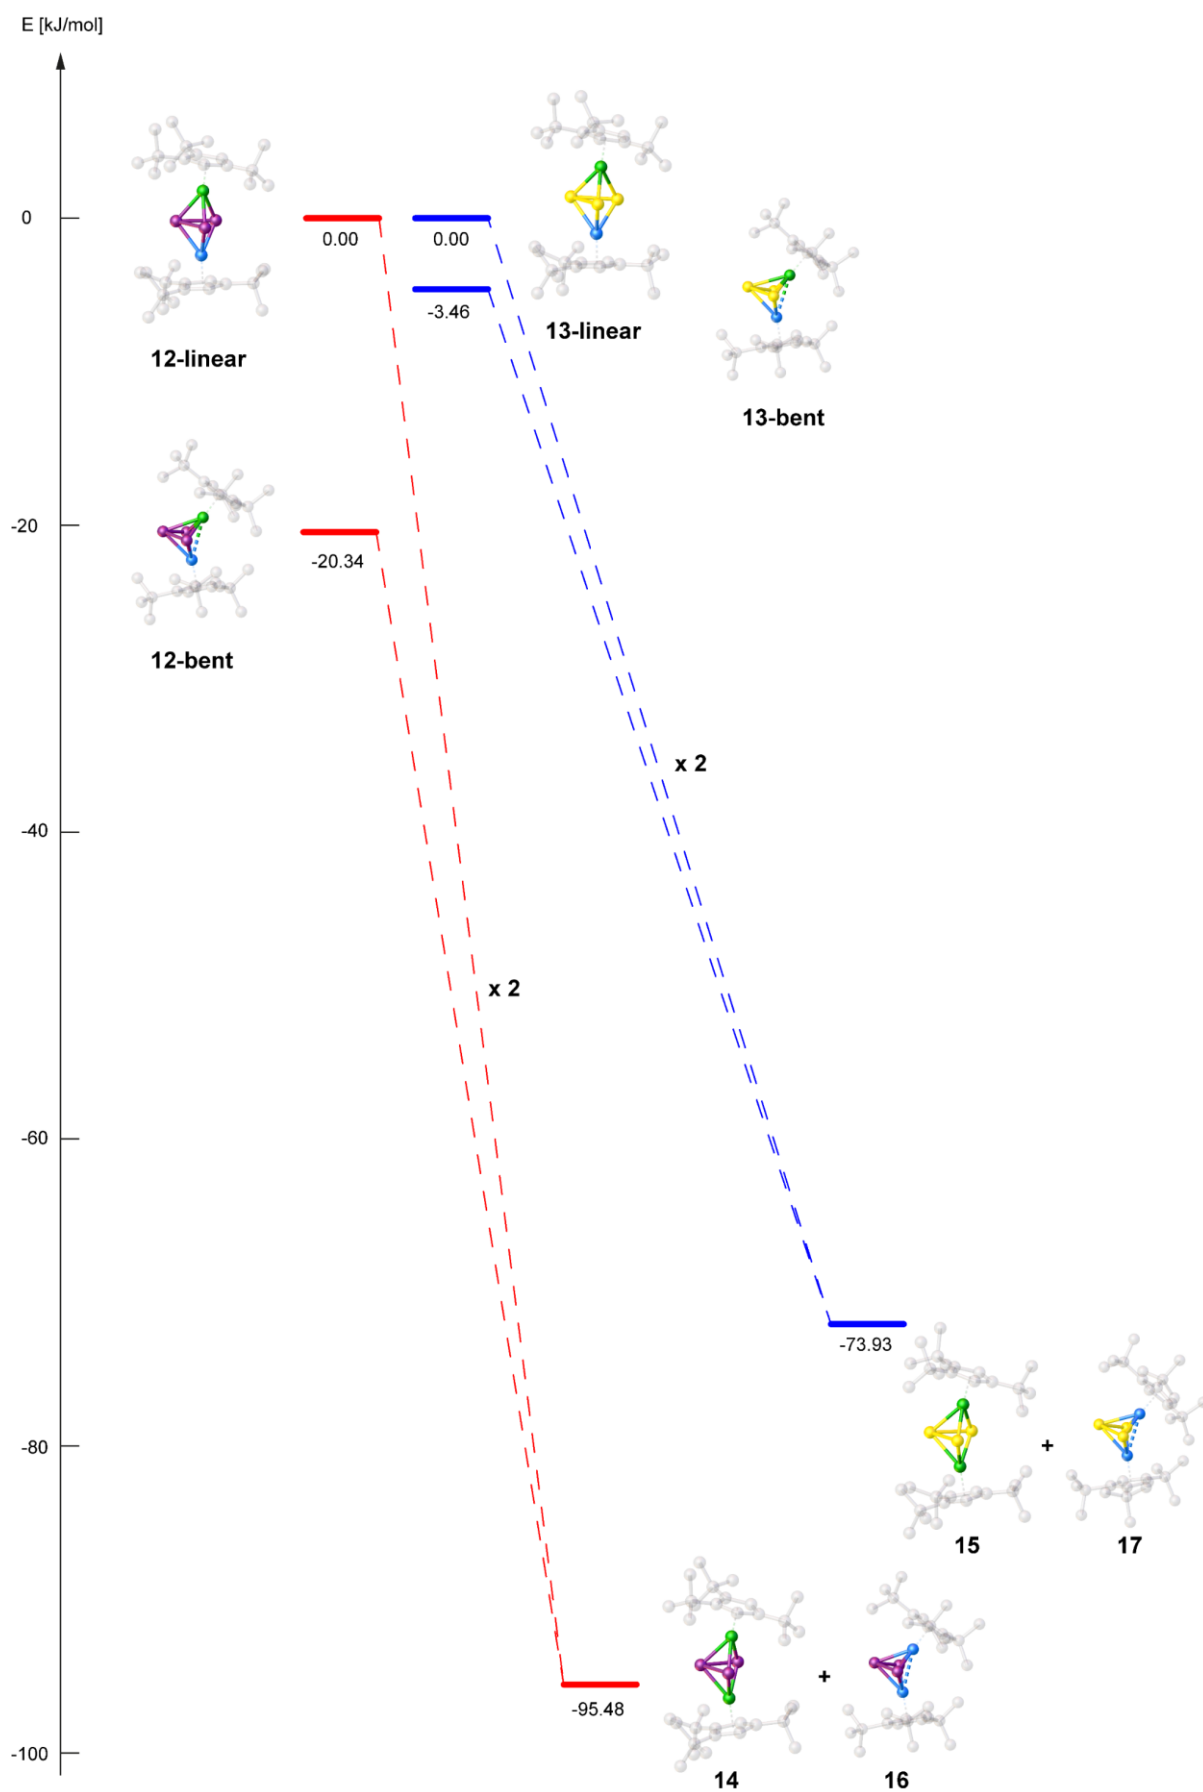

**Figure S85.** Energetic diagram of the conversion of the two isomer pairs **12-bent/12-linear** and **13-bent/13-linear** into **14/16** and **15/17**. The energetically less favored isomer (**12-linear/13-linear**) were chosen as reference.



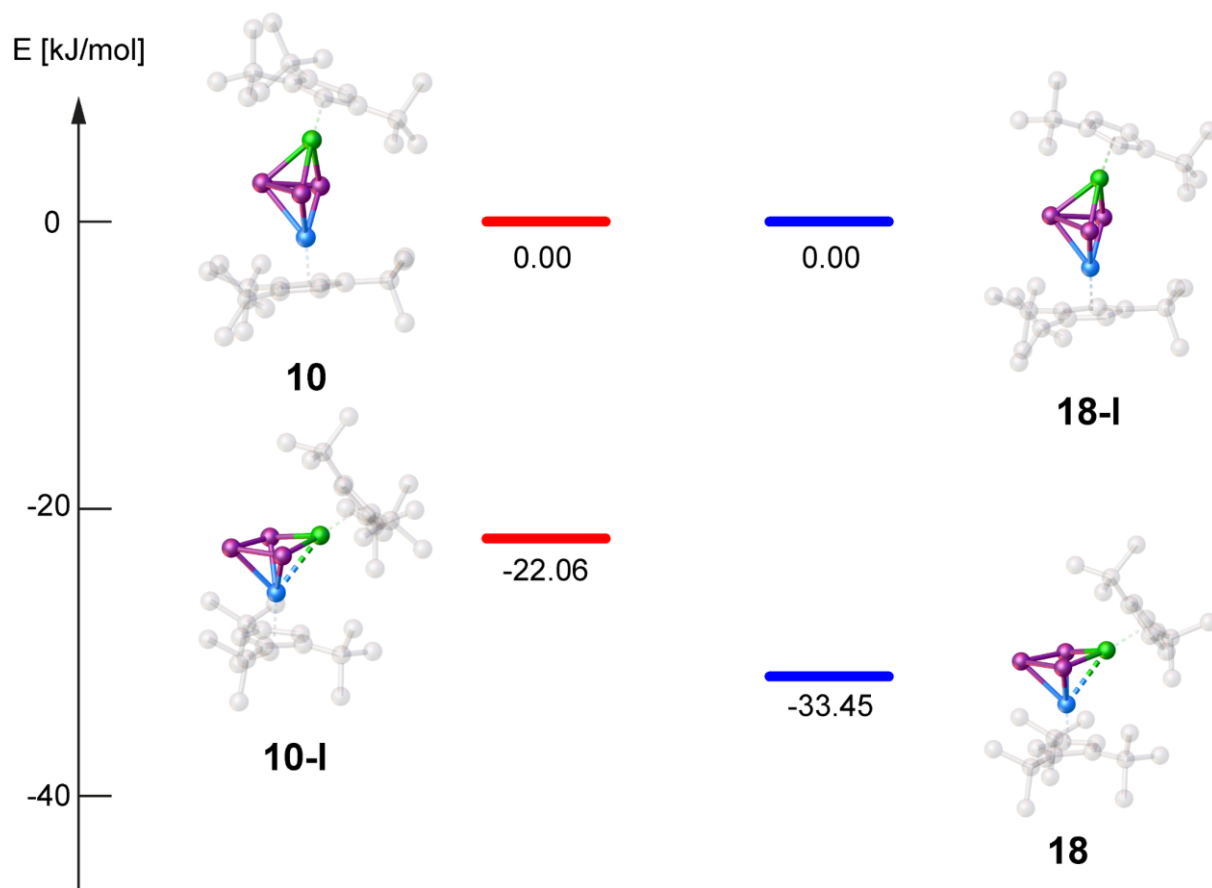

**Figure S86.** Energetic diagram of the isomer pairs **10/10-I** and **18/18-I**.

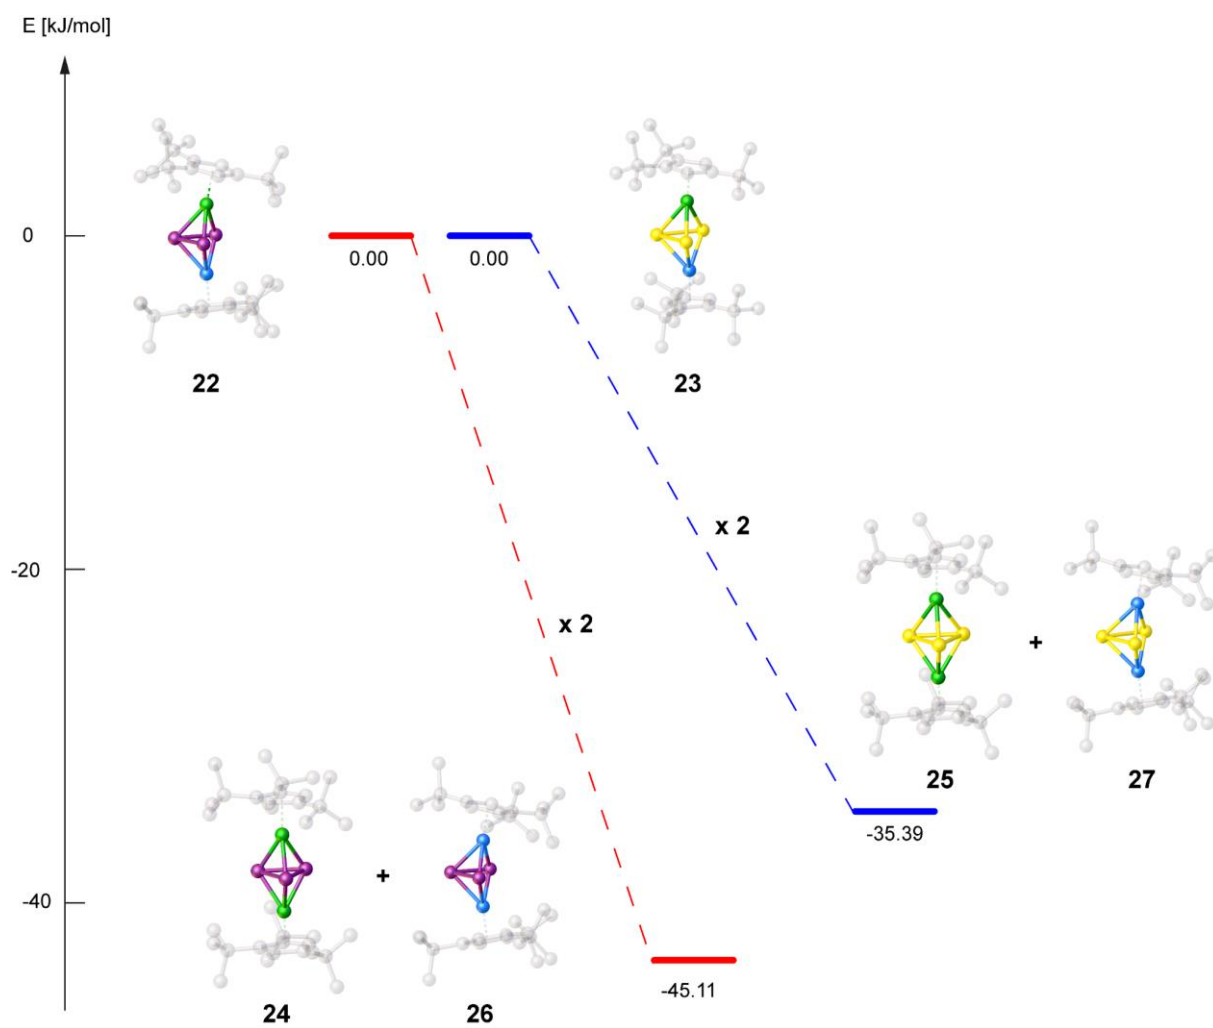

Figure S87. Energetic diagram of the conversion of 22 and 23 into 24/26 and 25/27.

**Table S5:** Optimized geometries of **1** (left) and **2** (right). XYZ coordinated in angstroms. BP86/def2-TZVP level of theory.

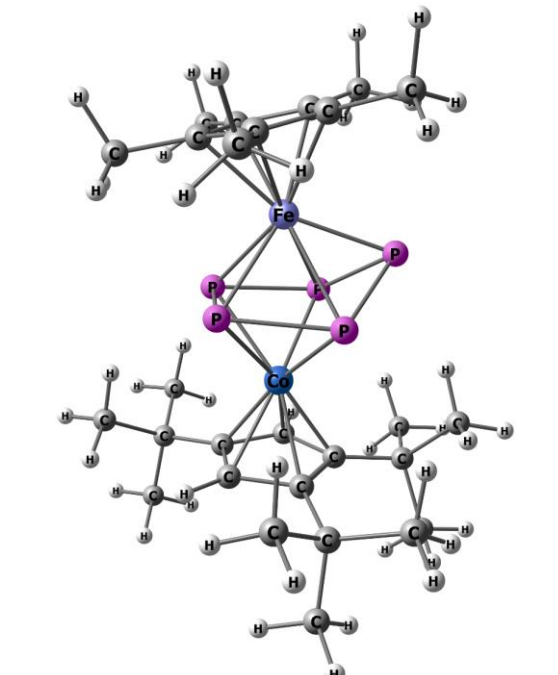



|    |              |              |              |   |              |              |              |    |              |              |              |   |              |              |              |
|----|--------------|--------------|--------------|---|--------------|--------------|--------------|----|--------------|--------------|--------------|---|--------------|--------------|--------------|
| Co | -0.983296000 | 0.225091000  | -0.031174000 | H | 3.070522000  | 3.035374000  | 1.166298000  | As | 0.218197000  | -1.641108000 | 0.759689000  | H | -4.177526000 | 4.760593000  | -0.150567000 |
| Fe | 2.282592000  | -0.126427000 | -0.018176000 | H | 4.610793000  | 2.667568000  | 1.977758000  | As | 0.373061000  | 0.636106000  | 1.757517000  | H | -4.459341000 | 3.368772000  | 0.928986000  |
| P  | 0.813077000  | 1.678508000  | -0.291484000 | H | 3.078717000  | 2.667568000  | 2.631379000  | As | 0.349524000  | -1.072017000 | -1.525797000 | C | 2.851208000  | -0.861381000 | 3.210191000  |
| P  | 0.331130000  | -1.493644000 | 0.731881000  | C | -2.143537000 | -2.932490000 | -1.578560000 | As | 0.536610000  | 1.388256000  | -1.333690000 | H | -1.573971000 | -1.131931000 | 3.072216000  |
| P  | 0.664404000  | 0.590882000  | 1.548140000  | H | -1.133499000 | -2.632715000 | -1.885458000 | As | 1.817854000  | 2.120171000  | 0.554794000  | H | -2.992496000 | -1.594425000 | 4.042867000  |
| P  | 1.360171000  | -1.879705000 | -1.140956000 | H | -2.484978000 | -3.731146000 | -2.255674000 | Co | -1.170987000 | 0.200117000  | -0.068434000 | H | -2.794281000 | 0.082773000  | 3.516114000  |
| P  | 0.484612000  | 0.001280000  | -1.775707000 | H | -2.068849000 | -3.350080000 | -0.572870000 | Fe | 2.152226000  | -0.227617000 | -0.002321000 | C | -4.943733000 | -1.042623000 | 2.211424000  |
| C  | -2.555449000 | 1.689454000  | -1.108880000 | C | 3.996548000  | 2.169504000  | -1.474625000 | C  | -3.059298000 | -0.577745000 | -0.692111000 | H | -5.098919000 | 0.022547000  | 2.437289000  |
| C  | -2.652573000 | 0.913954000  | 1.073854000  | H | 3.556278000  | 1.926677000  | -2.451563000 | C  | -2.791699000 | 0.733089000  | -1.229309000 | H | -5.291531000 | -1.622050000 | 3.074426000  |
| H  | -2.806830000 | 1.315533000  | 2.080180000  | H | 5.034737000  | 2.501613000  | -1.642332000 | C  | -2.710235000 | 0.962453000  | -2.285441000 | H | -5.570643000 | -1.296897000 | 1.348868000  |
| C  | -2.795670000 | -0.588706000 | -0.702867000 | H | 3.433282000  | 3.017133000  | -1.061693000 | C  | -3.036203000 | -0.436860000 | 0.759963000  | C | -2.842236000 | 3.207070000  | -0.298528000 |
| C  | -2.617508000 | 0.759018000  | -1.188397000 | C | -4.566464000 | -2.189031000 | -1.457328000 | C  | 3.312545000  | -1.941421000 | -0.325148000 | C | -2.607740000 | -3.006328000 | -1.497998000 |
| H  | -2.532349000 | 1.030378000  | -2.234236000 | H | -4.714739000 | -2.653055000 | -0.474826000 | C  | -2.768705000 | 0.955718000  | 1.028110000  | H | -1.584947000 | -2.815335000 | -1.850118000 |
| C  | 3.956822000  | 0.990048000  | -0.558084000 | H | -4.847312000 | -2.928279000 | -2.223594000 | H  | -2.704112000 | 1.388471000  | 2.020604000  | H | -3.041359000 | -3.798510000 | -2.128349000 |
| C  | -2.564140000 | 3.201767000  | -0.202736000 | H | -5.255479000 | -1.334357000 | -1.535269000 | C  | -2.648505000 | 1.695673000  | -0.180869000 | H | -2.535065000 | -3.386145000 | -0.476195000 |
| C  | -2.860050000 | -0.489266000 | 0.759166000  | C | 4.424248000  | -0.855469000 | -2.336966000 | C  | -3.446529000 | -1.331816000 | 1.338338000  | C | 4.681356000  | 1.462838000  | -1.187625000 |
| C  | 4.138707000  | -0.380228000 | -0.948578000 | H | 4.107918000  | -1.896927000 | -2.476533000 | C  | 3.642883000  | -0.918524000 | -1.282624000 | H | 4.114774000  | 1.746833000  | -2.085030000 |
| C  | 3.825855000  | -0.329126000 | 1.358544000  | H | 5.504390000  | -0.793531000 | -2.552583000 | C  | 3.545261000  | -1.410659000 | 0.992995000  | H | 5.728415000  | 1.293810000  | -1.492301000 |
| C  | 3.787480000  | 1.025446000  | 0.871005000  | H | 3.898489000  | -0.243842000 | -3.083042000 | C  | 4.118068000  | -0.027160000 | -0.560146000 | H | 4.666298000  | 2.213977000  | -0.495273000 |
| C  | -3.164802000 | -1.443491000 | 1.903448000  | C | -1.807422000 | 3.839117000  | 0.978148000  | C  | -3.462912000 | -1.731494000 | -1.623106000 | C | 3.378906000  | -2.143924000 | 2.284668000  |
| C  | -3.105693000 | -1.734777000 | -1.675567000 | H | -2.248434000 | 3.540502000  | 1.942159000  | C  | 4.061977000  | 0.079319000  | 0.648275000  | H | 3.083342000  | -1.463579000 | 3.094644000  |
| C  | -2.400349000 | -1.059437000 | 3.190901000  | H | -1.850566000 | 4.930688000  | 0.910174000  | C  | -3.254175000 | -2.841298000 | 1.743950000  | H | 4.324055000  | -2.631755000 | 2.581154000  |
| H  | -1.312610000 | -1.137603000 | 3.046403000  | H | -0.751453000 | 3.526896000  | 0.979633000  | H  | -3.894153000 | -3.252333000 | 0.955608000  | H | 2.608685000  | -2.922424000 | 2.208952000  |
| H  | -2.697244000 | -1.750325000 | 3.997698000  | C | 4.287837000  | -2.672055000 | 0.315377000  | H  | -3.516093000 | -3.357681000 | 2.678990000  | C | -3.241155000 | -1.286679000 | -3.098711000 |
| H  | -2.632194000 | -0.043178000 | 3.534886000  | H | 3.669780000  | -3.131519000 | 1.099350000  | C  | -2.205298000 | -3.075738000 | 1.511722000  | H | -4.021112000 | -0.456247000 | -3.335846000 |
| C  | 4.065025000  | -1.195477000 | 0.237492000  | H | 5.343472000  | -2.886680000 | 0.552784000  | C  | -4.952649000 | -2.057540000 | -1.371850000 | H | -3.603244000 | -2.132168000 | -3.749483000 |
| H  | -4.679370000 | -1.255437000 | 2.167587000  | H | 4.043500000  | -3.166570000 | -0.633124000 | H  | -5.121894000 | -2.476443000 | -0.372749000 | H | -2.311928000 | -0.982715000 | -3.339951000 |
| H  | -4.302344000 | -0.211392000 | 2.431901000  | C | -3.02729000  | -1.230708000 | -3.131498000 | H  | -5.305158000 | -2.794605000 | -2.110016000 | C | 4.564107000  | 0.769721000  | 1.372751000  |
| H  | -4.998936000 | -1.899544000 | 3.001840000  | H | -3.732425000 | -0.436903000 | -3.348530000 | H  | -5.569065000 | -1.151027000 | -1.467477000 | H | 4.604031000  | 1.830005000  | -1.693835000 |
| H  | -5.278171000 | -1.514145000 | 1.283473000  | H | -3.206599000 | -2.068550000 | -3.814303000 | C  | 3.600170000  | -1.048645000 | -2.770961000 | H | 5.579628000  | 0.452386000  | 2.265890000  |
| C  | -1.950890000 | 3.684807000  | -1.527626000 | H | -1.992730000 | -0.855527000 | -3.356241000 | H  | 2.858864000  | -1.794221000 | -3.088858000 | H | 3.918278000  | 0.682556000  | 2.857775000  |
| H  | -0.901275000 | 3.370807000  | -1.617555000 | C | -0.046880000 | 3.642630000  | -0.147775000 | H  | 4.582783000  | -1.360507000 | -3.163889000 | C | -1.740527000 | 3.839511000  | 0.774826000  |
| H  | -1.98041000  | 4.783583000  | -1.377704000 | H | -4.617599000 | 3.202522000  | -0.978082000 | C  | 3.333795000  | -0.084278000 | -3.245717000 | H | -2.059693000 | 3.557478000  | 1.788853000  |
| H  | -2.503837000 | 3.293583000  | -2.394036000 | H | -4.122275000 | 4.739147000  | -0.218466000 | C  | 2.880847000  | -3.333696000 | -0.647406000 | H | -1.780244000 | 4.937134000  | -0.704627000 |
| C  | -2.882974000 | -2.932985000 | 1.666229000  | H | -4.516063000 | 3.323260000  | 0.794463000  | H  | 2.271227000  | -3.766329000 | 0.158016000  | H | -0.698182000 | 3.516283000  | 0.648667000  |
| H  | -3.489742000 | -3.348978000 | 0.840877000  | C | 3.697638000  | -0.758436000 | 2.784171000  | H  | 3.180318000  | -3.983319000 | -0.791429000 | C | -2.195883000 | 3.627038000  | -1.690259000 |
| H  | -3.152095000 | -3.492364000 | 2.574752000  | H | 3.032826000  | -0.087079000 | 3.344990000  | C  | 2.280479000  | -3.370837000 | -1.567546000 | H | -1.161033000 | 3.366464000  | -1.903662000 |
| H  | -1.815603000 | -3.106393000 | 1.470697000  | H | 4.679808000  | -0.761211000 | 3.280656000  | C  | -4.104412000 | 3.664737000  | -0.069195000 | H | -2.246903000 | 4.769456000  | -1.751896000 |
| C  | 3.626419000  | 2.253887000  | 1.703568000  | H | 3.278337000  | -1.771035000 | 2.855719000  | H  | -4.776777000 | 3.217193000  | -0.816574000 | H | -2.843444000 | 3.262073000  | -2.479495000 |

**Table S6:** Optimized geometries of **3** (left) and **4** (right). XYZ coordinated in angstroms. BP86/def2-TZVP level of theory.

|    |              |              |              |   |              |              |              |    |              |              |              |   |              |              |              |
|----|--------------|--------------|--------------|---|--------------|--------------|--------------|----|--------------|--------------|--------------|---|--------------|--------------|--------------|
| Fe | 2.228631000  | -0.103493000 | -0.010914000 | H | -3.164172000 | -3.606241000 | 2.397351000  | As | 0.337492000  | -0.434764000 | 1.875125000  | C | -3.446975000 | -1.654166000 | -1.667212000 |
| Co | -0.910362000 | 0.209971000  | -0.006155000 | H | -1.808083000 | -3.203778000 | 1.328804000  | As | 0.292486000  | -1.866791000 | -0.066982000 | C | -2.777673000 | -1.459187000 | -3.044573000 |
| P  | 0.411708000  | -1.627342000 | 0.637803000  | C | -2.376635000 | -1.224758000 | 3.146323000  | As | 0.484509000  | -0.378940000 | -1.912096000 | H | -2.989527000 | -0.478783000 | -3.489398000 |
| P  | 0.630542000  | 0.795386000  | -1.674084000 | H | -1.290709000 | -1.345434000 | 3.029520000  | As | 0.629608000  | 1.796550000  | -0.924031000 | H | -3.161825000 | -2.221767000 | -3.736974000 |
| P  | 0.885192000  | 1.780883000  | 0.263427000  | H | -2.710898000 | -1.935999000 | 3.914804000  | As | 1.324715000  | 1.659474000  | 1.346595000  | H | -1.687788000 | 1.583850000  | -2.977655000 |
| P  | 0.947022000  | -1.324873000 | -1.432516000 | H | -2.574631000 | -0.215949000 | 3.528957000  | Co | -1.100400000 | 0.193222000  | -0.049883000 | C | -4.974646000 | -1.467834000 | -1.862024000 |
| P  | 0.699841000  | 0.236270000  | 1.749090000  | C | -2.182939000 | -2.863134000 | -1.736919000 | Fe | 2.118063000  | -0.164277000 | -0.031201000 | H | -5.525840000 | -1.588018000 | -0.921067000 |
| C  | -2.568785000 | 0.864586000  | 1.125424000  | H | -1.208839000 | -2.599681000 | -2.170434000 | C  | -3.004201000 | -0.568635600 | -0.682382000 | H | -5.347695000 | -2.214432000 | -2.579156000 |
| H  | -2.535219000 | 1.215562000  | 2.149641000  | H | -2.618411000 | -3.661654000 | -2.359525000 | C  | -2.927494000 | -0.477303000 | 0.777516000  | H | -3.194997000 | -0.466591000 | -2.259861000 |
| C  | -2.547581000 | 0.797896000  | -1.145722000 | H | -2.004091000 | -3.265088000 | -0.737699000 | C  | -2.677366000 | 0.914795000  | 1.094347000  | H | -3.155961000 | -3.101572000 | -1.248609000 |
| H  | -2.482133000 | 1.121471000  | -2.178263000 | C | -3.995664000 | 3.574255000  | -0.246725000 | H  | -2.581888000 | 1.309416000  | 2.089336000  | H | -2.079922000 | -3.259540000 | -1.082120000 |
| C  | -2.751146000 | -0.521812000 | 0.737810000  | H | -4.392537000 | 3.168289000  | -1.188115000 | C  | -2.617108000 | 1.692670000  | -0.087744000 | H | -3.467104000 | -3.774023000 | -2.081214000 |
| C  | -2.476057000 | 1.687379000  | -0.013342000 | H | -4.100636000 | 4.669215000  | -0.273400000 | C  | -2.761236000 | 0.760039000  | -1.169514000 | H | -3.700512000 | -3.406484000 | -3.049351000 |
| C  | -2.777651000 | -0.550809000 | -0.730484000 | H | -4.604649000 | 3.185606000  | 0.582728000  | H  | -2.288630000 | 1.035404000  | -2.217773000 | C | -3.287373000 | -1.461765000 | 1.902766000  |
| C  | -2.503043000 | 3.198538000  | -0.061013000 | C | -3.119637000 | -1.639866000 | -1.753982000 | C  | 3.592936000  | -1.508869000 | 0.577848000  | C | -4.775125000 | -1.847919000 | 1.742398000  |
| C  | 3.987265000  | -0.397474000 | -1.113584000 | C | -4.648656000 | -1.311918000 | 2.084017000  | C  | 3.928573000  | -0.183325000 | 1.021693000  | H | -5.401311000 | -0.951416000 | 1.607249000  |
| C  | 3.995309000  | 0.902274000  | -0.495017000 | H | -4.839303000 | -0.280478000 | 2.408527000  | C  | 4.041913000  | 0.661242000  | -0.141344000 | H | -5.116943000 | -2.391818000 | 2.617277000  |
| C  | 4.117893000  | 2.206306000  | -1.209517000 | H | -4.977874000 | -1.995564000 | 2.877293000  | C  | 3.780065000  | -0.144155000 | -1.302331000 | H | -4.937425000 | -2.495756000 | 0.855953000  |
| H  | 3.656409000  | 2.163138000  | -2.204801000 | H | -5.236733000 | -1.506489000 | 1.163162000  | C  | 3.517112000  | -1.488541000 | -0.859309000 | C | -2.415644000 | -2.729466000 | 1.989953100  |
| H  | 5.188904000  | 2.464673000  | -1.342737000 | C | -4.585734000 | -2.075420000 | -1.523653000 | C  | 3.437474000  | -2.705218000 | 1.457201000  | H | -2.286035000 | -3.226247000 | 1.029295000  |
| H  | 3.643890000  | 3.022666000  | -0.648994000 | H | -4.717877000 | -2.614120000 | -0.578455000 | H  | 4.423855000  | -3.145124000 | 1.676421000  | H | -2.893231000 | -3.446309000 | 2.674487000  |
| H  | 3.887433000  | -1.385283000 | -0.070595000 | H | -4.898937000 | -2.745943000 | -2.337755000 | H  | 2.824120000  | -3.481171000 | 0.980864000  | H | -1.426594000 | -2.491751000 | 2.404888000  |
| C  | -3.124920000 | -1.529706000 | 1.829739000  | H | -5.256454000 | -1.203685000 | -1.517812000 | H  | 2.967148000  | -2.441171000 | 2.414274000  | C | -3.172972000 | -0.768918000 | 3.277376000  |
| C  | 3.914284000  | 0.716715000  | 0.929832000  | C | -3.039430000 | -1.060984000 | -3.163097000 | C  | 4.208339000  | 0.205164000  | 2.436349000  | H | -2.152836000 | -0.398914000 | 3.467070000  |
| C  | -1.950413000 | 3.810619000  | 1.251427000  | H | -3.765284000 | -0.251090000 | -3.344725000 | H  | 4.100721000  | 1.288433000  | 2.593514000  | H | -3.411910000 | -1.438642000 | 4.062960000  |
| H  | -2.603550000 | 3.494326000  | 2.109621000  | H | -3.266267000 | -1.861474000 | -3.901371000 | H  | 5.241797000  | -0.071535000 | 2.701854000  | C | -3.875303000 | 0.072762000  | 3.376842000  |
| H  | -2.038421000 | 4.907432000  | 1.193321000  | H | -2.031055000 | -0.685125000 | -3.412294000 | H  | 3.536312000  | -0.310971000 | 3.135694000  | C | -2.698186000 | 3.020808000  | -0.168754000 |
| H  | -0.946112000 | 3.525230000  | 1.444953000  | C | 3.890210000  | -2.867107000 | -0.243258000 | C  | 4.444072000  | 2.098942000  | -0.156287000 | C | -2.323724000 | 3.725570000  | -1.563562000 |
| H  | -1.703709000 | 3.757032000  | -1.253047000 | H | 3.258517000  | -3.362987000 | 0.503046000  | H  | 3.962062000  | 2.643655000  | -0.979278000 | H | -1.298548000 | 3.466502000  | -1.831077000 |
| H  | -0.627016000 | 3.567182000  | -1.138299000 | H | 4.914049000  | -3.257548000 | -0.133216000 | H  | 5.534444000  | 2.183342000  | -0.292578000 | H | -2.412063000 | 4.821227000  | -1.584159000 |
| H  | -1.847924000 | 4.845526000  | -1.310106000 | H | 3.531593000  | -3.158126000 | -1.244865000 | H  | 4.184038000  | 2.603195000  | 0.783779000  | H | -2.990223000 | 3.320977000  | -2.338657000 |
| H  | -2.032831000 | 3.323855000  | -2.205138000 | C | 3.947681000  | 1.796462000  | 1.958721000  | C  | 3.868495000  | 0.315592000  | -2.720391000 | C | -4.191481000 | 3.532624000  | 0.097029000  |
| C  | 3.832740000  | -0.696405000 | 1.191203000  | H | 3.544288000  | 2.740795000  | 1.569292000  | H  | 3.228310000  | -0.279473000 | -3.363367000 | H | -4.841337000 | 3.029634000  | -0.633808000 |
| C  | 4.119423000  | -0.659446000 | -2.576931000 | H | 4.986747000  | 1.981945000  | 2.274600000  | H  | 4.904630000  | 2.014840000  | -3.082708000 | H | -4.349962000 | 4.618185000  | 0.014471000  |
| H  | 3.697666000  | -1.633599000 | -2.855192000 | H | 3.370204000  | 1.521645000  | 2.852583000  | H  | 3.580867000  | 1.370305000  | -2.824245000 | H | -4.492144000 | 3.212277000  | 1.104884000  |
| H  | 5.183330000  | -0.657775000 | -2.863896000 | C | 3.777439000  | -1.338978000 | 2.537140000  | C  | 3.299458000  | -2.669891000 | -1.742071000 | C | -1.841774000 | 3.892949000  | 0.904512000  |
| H  | 3.813933000  | 0.114417000  | -3.170312000 | H | 3.272624000  | -0.698584000 | -3.272861000 | H  | 2.679202000  | -3.433227000 | -1.251422000 | H | -2.055094000 | 3.505190000  | 1.910533000  |
| C  | -2.873370000 | -3.010859000 | 1.519687000  | H | 4.759142000  | -1.527141000 | 2.905140000  | H  | 4.254920000  | -3.136411000 | -1.996207000 | H | -2.053742000 | 4.821060000  | 0.907786000  |
| H  | -3.452796000 | -3.377643000 | 0.669714000  | H | 3.252802000  | -2.302709000 | 2.505345000  | H  | 2.799481000  | -2.388028000 | -2.683442000 | H | -0.768986000 | 3.759080000  | 0.711732000  |

**Table S7:** Optimized geometries of **5** (left) and **6** (right). XYZ coordinated in angstroms. BP86/def2-TZVP level of theory.

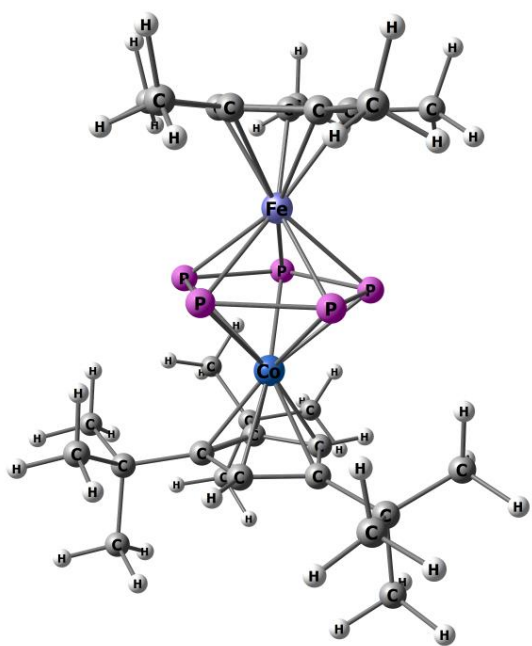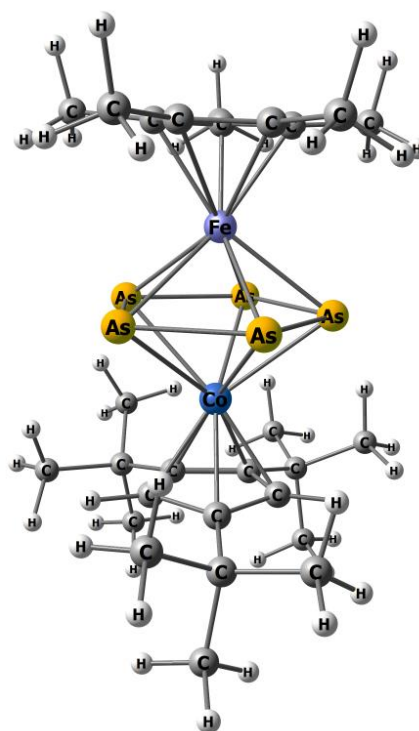

|    |              |              |              |   |              |              |               |    |              |              |               |   |             |              |              |
|----|--------------|--------------|--------------|---|--------------|--------------|---------------|----|--------------|--------------|---------------|---|-------------|--------------|--------------|
| Co | -0.852881000 | 0.229224000  | 0.016424000  | H | -4.305548000 | 3.114709000  | 1.213770000   | As | -0.459866000 | -1.124861000 | 1.636599000   | C | 3.301489000 | -1.524260000 | -1.785767000 |
| Fe | 2.143114000  | -0.086706000 | -0.002543000 | C | -3.093359000 | -1.553775000 | -1.793196000  | As | -0.685384000 | 1.234952000  | 1.649795000   | C | 4.806638000 | -1.178745000 | -1.988550000 |
| P  | 0.661039000  | 0.086404000  | -1.831984000 | C | -2.896993000 | -3.041712000 | -1.479969000  | As | -0.824200000 | 1.953285000  | -0.608874000  | H | 4.933624000 | -0.135912000 | -2.310696000 |
| P  | 0.905042000  | 1.811094000  | -0.542054000 | H | -1.837015000 | -3.284005000 | -1.318763000  | As | -0.532773000 | 0.060390000  | -0.2016107000 | H | 5.213964000 | -1.834875000 | -2.770881000 |
| P  | 0.468127000  | -1.663329000 | -0.572277000 | H | -3.234342000 | -3.621685000 | -2.350097000  | As | -0.301604000 | -1.854316000 | -0.623917000  | H | 5.389749000 | -1.328982000 | -1.072324000 |
| P  | 0.789672000  | 1.139761000  | 1.511783000  | H | -3.477711000 | -3.383882000 | -0.618163000  | Co | 0.984760000  | 0.226559000  | 0.012537000   | C | 3.165710000 | -0.018963000 | -1.471771000 |
| P  | 0.599806000  | -1.014777000 | 1.492317000  | C | 4.129881000  | 1.361030000  | 2.125677000   | Fe | -2.029112000 | -0.129262000 | -0.010656000  | H | 3.749885000 | -3.334230000 | -0.601731000 |
| C  | -2.679714000 | -0.550329000 | 0.753998000  | H | 3.797235000  | 2.366816000  | 1.922523000   | C  | 2.842000000  | -0.531291000 | -0.715111000  | H | 3.538004000 | -3.586533000 | -2.335943000 |
| C  | -3.028755000 | -1.618763000 | 1.789412000  | H | 5.202376000  | 1.405437000  | 2.375648000   | As | 2.828974000  | -0.529800000 | 0.754491000   | H | 2.115900000 | -3.309710000 | -1.320726000 |
| C  | -2.391392000 | 1.682017600  | 0.022253000  | H | 3.609895000  | 0.992186000  | 3.014084000   | C  | 2.596862000  | 0.834066000  | 1.153652000   | C | 2.588491000 | -1.296813000 | -3.134063000 |
| C  | 3.936596000  | 0.468113000  | 0.946352000  | C | -2.447282000 | 3.186947000  | 0.024926000   | H  | 2.514476000  | 1.165205000  | 2.183310000   | H | 1.518733000 | -1.528977000 | -3.077528000 |
| C  | -2.689802000 | -0.547492000 | -0.716315000 | C | -4.607911000 | -1.268920000 | -0.2017221000 | C  | 2.518777000  | 1.698854000  | 0.015683000   | H | 3.034410000 | -1.954931000 | -3.882670000 |
| C  | -2.488261000 | 0.820474000  | -1.113016000 | H | -5.197963000 | -1.444015000 | -1.109672000  | C  | 2.800409000  | 0.832601000  | -1.116416000  | H | 2.697237000 | -0.263003000 | -3.512986000 |
| H  | -2.398268000 | 1.157623000  | -2.141113000 | H | -4.975185000 | -1.941176000 | -2.805831000  | H  | 2.545705000  | 1.168548000  | -2.1446647000 | C | 3.228723000 | -1.578778000 | 1.794703000  |
| C  | -2.459430000 | 0.815701000  | 1.157695000  | H | -4.772739000 | -0.232078000 | -2.341709000  | C  | -3.680578000 | -0.761198000 | 1.123603000   | C | 2.447618000 | -2.907327000 | 1.747429000  |
| H  | -2.481485000 | 1.143499000  | 2.188399000  | C | -2.002082000 | 3.779456000  | -1.320286000  | C  | -3.566653000 | -1.561251000 | -0.067598000  | H | 1.485693000 | -2.802206000 | 2.268568000  |
| H  | -2.179526000 | -3.905515000 | 1.735669000  | H | -0.957760000 | 3.523944000  | -1.552269000  | C  | -3.664839000 | -0.684275000 | -1.204482000  | H | 3.023299000 | -3.680781000 | 2.275022000  |
| H  | -1.969463000 | -3.254717000 | 0.723518000  | H | -2.076047000 | 4.874396000  | -1.277767000  | C  | -3.845969000 | 0.658123000  | -0.716466000  | H | 2.247904000 | -3.263459000 | 0.735704000  |
| H  | -2.710701000 | -2.705739000 | 2.269819000  | H | -2.636714000 | 3.434734000  | -2.148525000  | C  | -3.849643000 | 0.611248000  | 0.722092000   | C | 4.743012000 | -1.840521000 | 1.579173000  |
| H  | -1.221027000 | -2.753988000 | 2.249035000  | C | -1.646456000 | 3.808995000  | 1.179340000   | C  | -3.731847000 | -1.276332000 | 2.523008000   | H | 4.940143000 | -2.405127000 | 0.661612000  |
| C  | 3.782166000  | -0.963834000 | 0.983657000  | H | -1.912872000 | 3.372212000  | 2.1514891000  | H  | -4.779012000 | -1.482014000 | 2.797749000   | H | 5.119308000 | -2.431630000 | 2.425916000  |
| C  | 3.708952000  | -1.437849000 | -0.374731000 | H | -1.861162000 | 4.885325000  | 1.228145000   | C  | -3.338891000 | -0.547663000 | 3.243981000   | H | 5.307525000 | -0.897986000 | 1.539949000  |
| C  | 3.963598000  | 0.877694000  | -0.433687000 | H | -0.564441000 | 3.693940000  | 1.029972000   | H  | -3.172853000 | -2.215062000 | 2.635120000   | C | 3.066787000 | -1.016234000 | 3.222463000  |
| C  | -2.887592000 | -1.052060000 | 3.217817000  | C | 3.805692000  | -1.814331000 | 2.208970000   | C  | -3.470578000 | -0.049106000 | -0.109703000  | H | 3.737009000 | -0.167212000 | 3.415388000  |
| H  | -1.863318000 | -0.709990000 | 3.428376000  | H | 3.450138000  | -1.270504000 | 3.093269000   | H  | -3.013799000 | -3.406361000 | -1.041834000  | H | 3.323373000 | -1.808904000 | 3.938225000  |
| H  | -3.117364000 | -1.854076000 | 3.332043000  | H | 4.842881000  | -2.128116000 | 2.410305000   | H  | -4.482362000 | -3.481910000 | -0.051825000  | H | 2.031903000 | -0.708058000 | 3.432184000  |
| H  | -3.586840000 | -0.226684000 | 3.411349000  | H | 3.205127000  | -2.725708000 | 2.092722000   | H  | -2.894302000 | -3.446118000 | 0.736177000   | C | 2.622974000 | 3.200861000  | 0.014461000  |
| C  | 3.625531000  | -2.864610000 | -0.801618000 | C | 3.874776000  | -0.339251000 | -2.740433000  | C  | -3.698203000 | -1.111886000 | -2.633752000  | C | 1.822799000 | 3.861470000  | 1.147033000  |
| H  | 3.110139000  | -3.486718000 | -0.059158000 | H | 3.348462000  | -1.211206000 | -3.148536000  | H  | -3.386778000 | -0.306601000 | -3.311429000  | H | 0.742270000 | 3.824005000  | 0.954764000  |
| H  | 4.643616000  | -3.268819000 | -0.922565000 | H | 4.925985000  | -0.405267000 | -3.064535000  | H  | -4.729086000 | -1.390455000 | -2.906179000  | H | 2.107959000 | 4.919802000  | 1.222588000  |
| C  | 3.110484000  | -2.975114000 | -1.704638000 | H | 3.448458000  | 0.567460000  | -3.189381000  | C  | -3.061439000 | -1.987530000 | -2.816955000  | H | 2.019170000 | 3.393044000  | 2.121401000  |
| C  | -4.529279000 | -1.950622000 | 1.572925000  | C | -2.363202000 | -1.279825000 | -3.125754000  | C  | -4.102529000 | 1.863384000  | -1.558117000  | C | 4.139031000 | 3.452121000  | 0.265184000  |
| H  | -5.139727000 | -1.036805000 | 1.543991000  | H | -2.524768000 | -0.266616000 | -3.513047000  | H  | -8.336274000 | 2.792826000  | -1.040338000  | H | 4.444727000 | 3.076847000  | 1.251799000  |
| H  | -4.874394000 | -2.567765000 | 2.414370000  | H | -2.749055000 | -1.977607000 | -3.880718000  | H  | -5.177856000 | 1.919497000  | -1.792861000  | H | 4.328048000 | 4.534454000  | 0.228672000  |
| H  | -4.706339000 | -2.514531000 | 0.649763000  | H | -1.282625000 | -1.456625000 | -3.030947000  | C  | -3.559976000 | 1.824934000  | -2.512195000  | H | 4.756463000 | 2.983710000  | -0.501504000 |
| C  | 3.820591000  | -0.300108000 | -1.250547000 | C | 4.202582000  | 2.263542000  | -0.931270000  | C  | -4.090146000 | 1.769213000  | 1.631578000   | C | 2.236114000 | 3.802284000  | -1.344382000 |
| C  | -3.958147000 | 3.493130000  | 0.242100000  | H | 3.772307000  | 2.423307000  | -1.927970000  | C  | -3.655619000 | 1.605287000  | 2.626202000   | C | 2.886703000 | 3.3626021000 | -1.504588000 |
| H  | -4.573197000 | 3.044677000  | -0.549926000 | H | 5.288290000  | 2.435758000  | -1.010457000  | H  | -5.174459000 | 1.913888000  | 1.764372000   | H | 2.338904000 | 4.895005000  | -1.303074000 |
| H  | -4.109887000 | 4.582837000  | 0.219906000  | H | 3.799578000  | 3.024127000  | -0.249794000  | H  | -6.789090000 | 2.702049000  | 1.235080000   | H | 1.193784000 | 5.574806000  | -1.611916000 |

**Table S8:** Optimized geometries of **7** (left) and **8** (right). XYZ coordinated in angstroms. BP86/def2-TZVP level of theory.

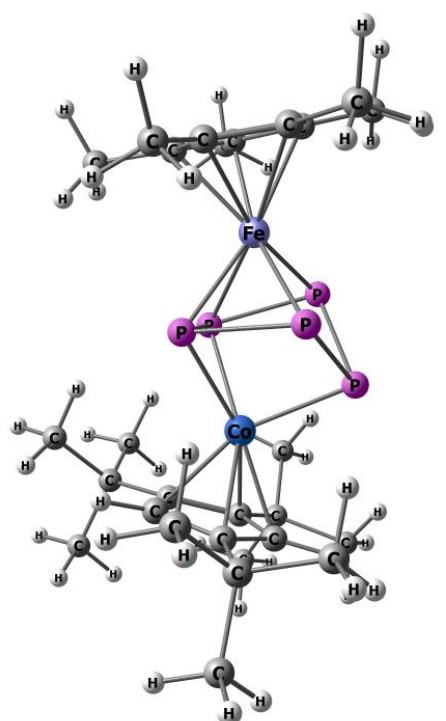


|    |             |             |             |   |             |             |             |    |             |             |             |   |             |             |             |
|----|-------------|-------------|-------------|---|-------------|-------------|-------------|----|-------------|-------------|-------------|---|-------------|-------------|-------------|
| Co | 1.13753600  | 0.26056500  | -0.18337400 | H | 5.11507100  | -2.98150100 | -1.96209300 | Co | 1.38816900  | 0.26309700  | -0.06403100 | H | 5.31001900  | -3.04016000 | -1.84370600 |
| Fe | -2.43876700 | -0.09831100 | -0.07290000 | H | 4.69735100  | -2.85060500 | -0.24206300 | Fe | -2.36208300 | -0.10438500 | 0.11803500  | H | 4.90647600  | -2.89186700 | -0.12099400 |
| P  | 0.06619500  | 0.48309600  | -2.15443200 | C | -4.36451700 | -0.50459600 | -0.78315500 | As | 0.30695700  | 0.54524900  | -2.15512800 | C | -4.29910200 | -0.71732700 | -0.39033500 |
| P  | -1.15948100 | 1.89383800  | -0.74376700 | C | -3.99162500 | -1.42547100 | 0.26032800  | As | -1.27865500 | 1.96159100  | -0.76544400 | C | -3.76444200 | -1.51815800 | 0.68050300  |
| P  | -0.67479900 | 0.68486700  | 1.14868400  | C | -3.70714300 | -0.65579600 | 1.44960300  | As | -0.48942800 | 0.90866500  | 1.30436300  | C | -3.44378300 | -0.63399100 | 1.77734500  |
| P  | -1.30397700 | -1.19292500 | -1.70161700 | C | -3.92220300 | 0.73595300  | 1.13838700  | As | -1.33102300 | -1.25685800 | -1.74225500 | C | -3.80038300 | 0.70907500  | 1.38128200  |
| P  | -0.48616800 | -1.41719700 | 0.31669000  | C | -4.31309400 | 0.82589200  | -0.24305100 | As | -0.29747900 | -1.49403900 | 0.40799800  | C | -4.31405900 | 0.65367100  | 0.03922400  |
| C  | 3.07004900  | -0.53572100 | -0.53560700 | C | -4.80870300 | -0.87399600 | -2.16349300 | C  | 3.28237200  | -0.58570400 | -0.43220800 | C | -4.84523300 | -1.23893700 | -1.68236200 |
| C  | 2.81344300  | -0.58035000 | 0.87713900  | H | -4.58034800 | -0.07540700 | -2.88296500 | C  | 3.01967700  | -0.63655800 | 1.00176200  | H | -4.73349000 | -0.50463100 | -2.48214700 |
| C  | 2.96897500  | 0.85760700  | -0.93440900 | H | -5.89835700 | -1.05334600 | -2.19485900 | C  | 3.22820000  | 0.81096000  | -0.80085600 | H | -5.92003400 | -1.47687200 | -1.58813900 |
| H  | 3.09021000  | 1.22882700  | -1.94495900 | H | -4.30624800 | -1.78634600 | -2.51312300 | C  | 3.36598800  | 1.18867500  | -1.80660200 | H | -4.32318400 | -2.15429100 | -1.99398100 |
| C  | 2.58186900  | 0.70185500  | 1.29696200  | C | -3.93234200 | -2.91508700 | 0.13303800  | C  | 2.81962300  | 0.72406200  | 1.42990800  | C | -3.59999800 | -3.06533000 | 0.65653900  |
| H  | 2.33818500  | 1.07743200  | 2.31132600  | H | -3.59594100 | -3.21145400 | -0.87164100 | H  | 2.58333300  | 1.02801100  | 2.44603900  | H | -3.22917900 | -3.34692900 | -0.32294600 |
| C  | 2.68926600  | 1.67572800  | 0.19895900  | H | -4.91741200 | -3.38259600 | 0.30813800  | C  | 2.94939900  | 1.62512400  | 0.33666000  | H | -4.55317200 | -3.52685800 | 0.85336000  |
| C  | 2.91691600  | -1.67439200 | 1.94887600  | H | -3.22302200 | -3.34316200 | 0.85554400  | C  | 3.10319300  | -1.73721800 | 2.06988000  | H | -2.87290500 | -3.33313900 | 1.41248400  |
| C  | 3.46882300  | -1.60056900 | -1.58756900 | C | -3.26646000 | -1.20916300 | 2.78698800  | C  | 3.66814500  | -1.65078400 | -1.46808700 | C | -2.91708600 | -1.04546500 | 3.11597400  |
| C  | 2.61325600  | 3.18918000  | 0.22726900  | H | -2.78481900 | -2.15951200 | 2.68096600  | C  | 2.92120500  | 3.14070300  | 0.37094300  | H | -2.26046000 | -1.92253300 | 3.02655900  |
| C  | 2.35723300  | -2.64293600 | -1.82857800 | H | -4.21391500 | -1.39433200 | 3.41744400  | C  | 2.55741400  | -2.69206500 | -1.70737900 | H | -3.73318100 | -1.29848800 | 3.81533900  |
| H  | 2.07767800  | -3.18426700 | -0.92131200 | H | -2.66779600 | -0.51578400 | 3.32935100  | H  | 2.27184700  | -3.22825300 | -0.79907400 | H | -3.20005000 | -0.24002000 | 3.56723800  |
| C  | 2.68939500  | -3.37524800 | -2.58296600 | C | -3.78444400 | 1.89407700  | 2.07478800  | H  | 2.89229100  | -3.42894100 | -2.45603600 | C | -3.70073700 | 1.94478100  | 2.21904800  |
| H  | 1.45984800  | -2.14065100 | -2.13575400 | H | -3.15412700 | 1.63855100  | -2.33714600 | H  | 1.65320200  | -2.12033400 | -2.08280200 | H | -2.99447800 | 1.806882300 | 3.04932800  |
| C  | 3.72547600  | -0.93346400 | -2.95596600 | H | -4.76509700 | 2.22454600  | 2.45942700  | C  | 3.92164900  | -0.98376100 | -2.83746000 | H | -4.67900400 | 2.22145900  | 2.64959400  |
| H  | 2.81978200  | -0.43446900 | -3.33201300 | H | -3.31708500 | 2.75573400  | 1.57345600  | H  | 3.01726700  | -0.47489200 | -3.20476200 | H | -3.34528900 | 2.80207700  | 1.62581800  |
| H  | 4.01418300  | -1.70666100 | -3.68406600 | C | -4.69270400 | 2.08548000  | -0.95707400 | H  | 4.19627900  | -1.75837600 | -3.56951900 | C | -4.86629500 | 1.81246300  | -0.73042600 |
| H  | 4.53967500  | -0.19516200 | -2.90426000 | H | -4.08170000 | 2.94179000  | -0.59491700 | H  | 4.74323800  | -0.25351500 | -2.78217900 | H | -4.33077700 | 2.74134300  | -0.46837400 |
| C  | 4.37503600  | -1.67325100 | 2.46793100  | H | -5.76113900 | 2.32069700  | -0.80355300 | C  | 5.51893000  | -1.73414400 | 2.61564200  | H | -5.93494500 | 1.98920200  | -0.49754800 |
| H  | 5.08586700  | -1.92327700 | 1.66810500  | H | -4.52185000 | 2.00173900  | -0.03944500 | H  | 4.52763000  | -1.97606200 | 1.82512800  | H | -4.77996700 | 1.65345500  | -1.81423200 |
| H  | 4.49296300  | -2.41059300 | 3.27984300  | C | 1.70708000  | 3.67016700  | 1.37279600  | H  | 4.65901500  | -2.47800400 | 3.42207300  | C | 2.12558800  | 3.65097900  | 1.58269600  |
| H  | 4.64319900  | -0.65124800 | 2.86145400  | H | 0.68719000  | 3.27757000  | 1.24774000  | H  | 4.81076400  | -0.74451100 | 3.02070700  | H | 1.08426700  | 3.29822000  | 1.53070600  |
| C  | 2.54304400  | -3.09503500 | 1.49819800  | H | 1.66441500  | 4.77074900  | 1.38381800  | C  | 2.74930300  | -3.16043300 | 1.61092700  | H | 2.12286600  | 4.75213000  | 1.59632300  |
| H  | 1.51288800  | -3.11851400 | 1.11465100  | H | 2.08649000  | 3.39293000  | 2.35117100  | H  | 1.72235700  | -3.19923000 | 1.22012400  | H | 2.56602600  | 3.30451100  | 2.52979000  |
| H  | 2.60241200  | -3.77249700 | 2.36467400  | C | 4.04403500  | 3.73365200  | 0.44852700  | H  | 2.81012400  | -3.83909400 | 2.47633300  | C | 4.38214800  | 3.63797500  | 0.47682900  |
| H  | 3.21604500  | -3.48958600 | 0.72960400  | H | 4.46006900  | 3.36366700  | 1.39806700  | H  | 3.43257700  | -3.54495400 | 0.84642800  | H | 4.86082500  | 3.25003800  | 1.39904200  |
| C  | 1.98474900  | -1.34014000 | 3.13681200  | H | 4.03831400  | 4.83544200  | 0.49917800  | C  | 2.14599700  | -1.41687500 | 3.24044900  | H | 4.41527100  | 4.73911800  | 0.51102900  |
| H  | 2.27288600  | -0.41649400 | 3.64958600  | H | 4.71377400  | 3.41532800  | -0.36496200 | H  | 2.40762400  | -0.48252000 | 3.75459000  | H | 4.97333200  | 3.30141000  | -0.38831800 |
| H  | 2.03598100  | -2.15841900 | 3.87559100  | C | 2.06637000  | 3.73195800  | -1.10431200 | H  | 2.19628300  | -2.22763900 | 3.98334300  | C | 2.28823700  | 3.70200900  | -0.91446100 |
| H  | 0.94178700  | -1.24615700 | 2.80018600  | H | 2.69827700  | 3.43268200  | -1.95305000 | H  | 1.10705000  | -1.33854600 | 2.88517600  | H | 2.83646200  | 3.37468000  | -1.81010400 |
| C  | 4.78231000  | -2.28255100 | -1.17507400 | C | 2.03532800  | 4.83258600  | -0.10784800 | C  | 4.99202900  | -2.33340300 | -1.06041800 | H | 2.30240600  | 4.80320900  | -0.89347200 |
| H  | 5.58219300  | -1.53179700 | -1.03452600 | H | 1.04734300  | 3.35586000  | -1.28178000 | H  | 5.78742100  | -1.58286600 | -0.93322700 | H | 1.24497600  | 3.36494900  | -1.00994600 |





**Table S10:** Optimized geometries of **10-I** (left) and **11** (right). XYZ coordinated in angstroms. BP86/def2-TZVP level of theory.

Table with 10 columns (5 for each structure), listing atomic coordinates (X, Y, Z) for Ni, Co, P, C, H, and As in Angstroms. Each column corresponds to an atom in the respective structure. The table contains 100 rows of data.



**Table S11:** Optimized geometries of **12-bent** (left) and **12-linear** (right). XYZ coordinated in angstroms. BP86/def2-TZVP level of theory.

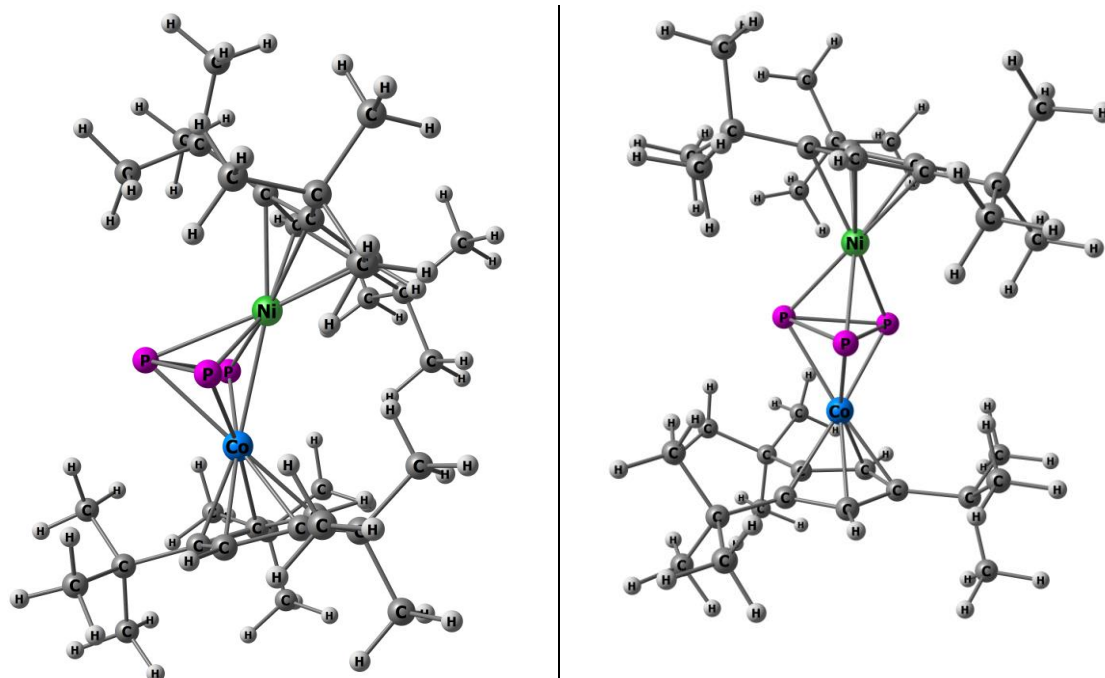

|    |              |               |              |   |              |              |              |    |              |              |              |   |              |              |              |
|----|--------------|---------------|--------------|---|--------------|--------------|--------------|----|--------------|--------------|--------------|---|--------------|--------------|--------------|
| Ni | 1.250562000  | -0.201812000  | -0.273831000 | C | -3.882711000 | -2.536493000 | -1.366794000 | Ni | -1.756184000 | 0.193318000  | 0.057162000  | H | -1.625526000 | 2.838666000  | 2.205558000  |
| Co | -1.302026000 | 0.336576000   | -0.197879000 | H | -4.585400000 | -1.950369000 | -1.966998000 | Co | 1.790613000  | 0.199400000  | -0.050108000 | H | -2.245669700 | 3.723478000  | -0.355592000 |
| P  | -0.381971000 | -1.366853000  | -1.195475000 | H | 4.269197000  | -3.564897000 | -1.323320000 | P  | 0.007117000  | 0.162922000  | -1.204340000 | H | -1.222258000 | 3.325722000  | -0.284513000 |
| P  | 0.305849000  | 1.773444000   | -0.532124000 | H | -2.913058000 | -2.566198000 | -1.885668000 | P  | 0.007135000  | -1.259339000 | 0.010727000  | H | -2.211056000 | 4.804628000  | -0.158933000 |
| P  | -0.089746000 | 0.503371000   | -2.247550000 | C | 5.504522000  | 0.132995000  | -1.938493000 | P  | 0.081266000  | 0.650139000  | 1.226980000  | H | -2.597663000 | 3.576969000  | -1.386367000 |
| C  | -2.767589000 | 1.704986000   | 0.309937000  | H | 5.671144000  | 1.103925000  | -1.459484000 | C  | -3.600793000 | -0.456078000 | -0.801436000 | C | -4.595102000 | 3.634056000  | 0.550771000  |
| H  | -2.743807000 | 2.754885000   | 0.044689000  | H | 6.005077000  | 0.152804000  | -2.917849000 | C  | -3.544253000 | -0.763467000 | 0.645402000  | H | -4.998508000 | 3.494641000  | -0.462357000 |
| C  | -2.430290000 | -0.262127000  | 1.405285000  | H | 5.986242000  | -0.640700000 | -1.327280000 | C  | -3.988457000 | 0.494549000  | 1.323373000  | H | -4.561871000 | 4.712558000  | 0.765461000  |
| H  | -2.104330000 | -0.978318000  | 2.151050000  | C | -2.837662000 | 1.978392000  | 3.706562000  | H  | -3.311361000 | 0.611121000  | 2.396928000  | H | -5.279961000 | 3.157856000  | 1.266536000  |
| C  | -3.334021000 | 0.663704000   | -0.516826000 | H | -3.688162000 | 2.526702000  | 3.276330000  | C  | -3.295512000 | 1.563156000  | 0.380307000  | C | 3.803336000  | -1.362515000 | 2.032454000  |
| H  | 2.761611000  | -1.663047000  | -0.432159000 | H | -2.504663000 | 2.508172000  | 4.611334000  | C  | -3.440791000 | 0.960230000  | -0.916739000 | C | 3.986968000  | -0.472096000 | 3.281261000  |
| C  | 2.701207000  | -2.516398000  | -1.096507000 | H | -3.183141000 | 0.976445000  | 3.989349000  | H  | -3.405284000 | 1.504657000  | -1.853423000 | H | 4.830740000  | 0.208453000  | 3.162564000  |
| C  | 2.548613000  | -0.364976000  | 1.426221000  | C | 3.823892000  | 2.868217000  | -0.307280000 | C  | 3.594079000  | -0.488330000 | 0.792972000  | H | 4.159577000  | -1.117360000 | 4.152919000  |
| H  | 2.309589000  | -0.026641000  | 2.427414000  | H | 4.498657000  | 2.576480000  | -1.117624000 | C  | 3.512730000  | -0.792984000 | -0.646048000 | H | 3.078376000  | 0.120862000  | 3.489923000  |
| C  | -3.157434000 | -0.598172000  | 0.215131000  | H | 4.208426000  | 3.808817000  | 0.117211000  | C  | 3.388242000  | 0.472573000  | -1.326592000 | C | 5.109228000  | -2.174019000 | 1.874916000  |
| C  | 2.290489000  | -1.663115000  | 0.927597000  | H | 2.831490000  | 3.077440000  | -0.733442000 | H  | 3.294125000  | 0.590499000  | -2.399556000 | H | 5.059594000  | -2.913172000 | 1.068244000  |
| C  | 3.174231000  | 0.454981000   | 0.410175000  | C | -2.848040000 | -3.031023000 | 0.621104000  | C  | 3.327028000  | 1.539246000  | -0.389303000 | H | 5.316073000  | -2.714174000 | 2.810334000  |
| C  | 3.342834000  | -0.400890000  | -0.774836000 | H | -1.815689000 | -3.023560000 | 0.443689000  | C  | 3.453960000  | 0.932497000  | 0.912757000  | H | 5.957282000  | -1.503940000 | 1.671485000  |
| C  | -2.209499000 | 1.153040000   | 1.495607000  | C | -3.255840000 | -4.039133000 | 0.665477000  | H  | 3.434667000  | 1.478905000  | 1.850077000  | C | 2.803099000  | -2.287395000 | 2.330218000  |
| C  | 1.763389000  | -2.944237000  | 1.709482000  | H | -2.826469000 | -2.852854000 | 1.903927000  | C  | -3.818195000 | -1.324959000 | -2.042270000 | H | 1.728038000  | -1.685374000 | 2.614739000  |
| C  | -0.502749000 | 1.114962000   | 3.333880000  | C | 5.152216000  | 1.550728000  | 1.385555000  | C  | -2.624288000 | -2.260570000 | -2.332594000 | H | 2.653930000  | -2.946070000 | 3.174600000  |
| H  | -0.823377000 | 0.127026000   | 3.691435000  | H | 5.100884000  | 0.854324000  | 2.234935000  | H  | -1.736526000 | -1.664170000 | -2.588874000 | H | 2.318783000  | -2.913055000 | 1.480767000  |
| H  | -0.107428000 | 0.167250000   | 4.194069000  | H | 5.589681000  | 2.496379000  | 1.739034000  | H  | -2.866123000 | -2.902353000 | -3.192815000 | C | 3.644256000  | -2.071027000 | -1.476315000 |
| H  | 0.307838000  | 0.967419000   | 2.608005000  | H | 5.822942000  | 1.121054000  | 0.631159000  | H  | -2.364856000 | -2.903278000 | -1.487977000 | C | 5.151686000  | -2.242980000 | -1.792441000 |
| C  | -3.728415000 | -2.0111168000 | 0.666748000  | C | 1.287345000  | -3.967919000 | 0.776579000  | C  | -5.132903000 | -2.123684000 | -1.866142000 | H | 5.539153000  | -1.962237000 | -2.324779000 |
| C  | -1.665614000 | 1.891089000   | 2.695520000  | H | 0.483280000  | -3.625139000 | 0.108622000  | H  | -5.097350000 | -2.863324000 | -1.089249000 | H | 5.294692000  | -3.125411000 | -2.433070000 |
| C  | -4.047501000 | 1.012011000   | -1.826310000 | H | 0.898420000  | -4.804724000 | 1.373302000  | H  | -5.339540000 | -2.662319000 | -2.833183000 | H | 5.746055000  | -2.378778000 | -0.879847000 |
| H  | 4.005111000  | -0.184817000  | -2.138655000 | H | 2.107365000  | -4.353010000 | 0.153237000  | H  | -5.976540000 | -1.445752000 | -1.700755000 | C | 3.099273000  | -3.249290000 | -0.823800000 |
| C  | -3.446174000 | 0.318979000   | -3.066237000 | C | 2.938530000  | -3.367614000 | 2.972589000  | C  | -3.975980000 | -0.429046000 | -3.289761000 | H | 3.621116000  | -3.623072000 | 0.098090000  |
| H  | -2.474181000 | 0.764998000   | -3.315902000 | H | 3.785131000  | -3.373478000 | 1.940926000  | H  | -4.823206000 | 0.265237000  | -3.193957000 | H | 3.225513000  | -4.184673000 | -1.528989000 |
| H  | -4.115987000 | 0.473328000   | -3.826551000 | H | 2.609109000  | -4.239983000 | 3.156630000  | H  | -4.161093000 | -1.069471000 | -4.163502000 | H | 2.025443000  | -3.253991000 | -0.605231000 |
| H  | -3.298020000 | -0.754556000  | -2.935454000 | H | 3.289494000  | -2.594289000 | 3.270836000  | H  | -3.062672000 | 0.148262000  | -3.492518000 | C | 2.887571000  | -1.914252000 | -2.815760000 |
| C  | 0.609448000  | -2.410184000  | 2.627294000  | C | -1.213915000 | 3.312685000  | 2.329217000  | C  | -3.704471000 | -2.040671000 | 1.470317000  | H | 1.826386000  | -1.878510000 | -2.640549000 |
| H  | 0.928626000  | -1.645175000  | 3.347897000  | H | -0.397635000 | 3.300365000  | 1.591423000  | C  | -2.960221000 | -1.694912000 | 2.817970000  | H | 2.945152000  | -1.961600000 | -3.368457000 |
| H  | 0.213555000  | -3.272963000  | 3.194300000  | H | -0.849428000 | 3.828353000  | 3.228473000  | H  | -1.894291000 | -1.672820000 | 2.658716000  | C | 3.319848000  | -1.136116000 | -3.458327000 |
| H  | -0.213246000 | -1.994962000  | 2.030472000  | H | -2.039868000 | 3.906395000  | 1.812932000  | H  | -3.039564000 | -2.842147000 | 3.369586000  | C | 3.222277000  | 3.018036000  | -0.669002000 |
| C  | 3.929589000  | -1.483251000  | -2.970174000 | C | -5.547024000 | 0.660291000  | -1.677011000 | H  | -3.989010000 | -1.112227000 | 3.457404000  | C | 4.676814000  | 3.570662000  | -0.615332000 |
| H  | 4.465247000  | -2.314004000  | -2.489077000 | H | -5.722089000 | -0.419822000 | -1.624125000 | C  | -3.164446000 | -3.323014000 | 0.820012000  | H | 5.115423000  | 3.415708000  | 0.378066000  |
| H  | 4.396804000  | -1.304093000  | -3.948547000 | H | -6.094590000 | 1.046255000  | -2.549151000 | H  | -3.681406000 | -3.591106000 | -0.106000000 | H | 4.660111000  | 4.650051000  | -0.826212000 |
| H  | 2.887534000  | -1.787407000  | -3.149720000 | H | -5.969775000 | 1.124158000  | -0.177989000 | H  | -3.300350000 | -4.157578000 | 1.522915000  | H | 5.307823000  | 3.076406000  | -1.362585000 |
| C  | 3.321466000  | 0.908245000   | -2.968843000 | C | -3.965193000 | 2.530386000  | -2.091621000 | H  | -2.088435000 | -3.233718000 | 0.608970000  | C | 2.368457000  | 3.730868000  | 0.394402000  |
| H  | 2.349555000  | 0.546861000   | -3.353672000 | H | -4.472847000 | 3.114460000  | -3.110618000 | C  | -2.517544000 | -2.197414000 | 1.768510000  | H | 1.333348000  | 3.589794000  | 0.377031000  |
| H  | 3.944138000  | 1.134746000   | -3.865238000 | H | -4.462793000 | 2.747693000  | -3.047096000 | H  | -5.600687000 | -1.316162000 | 2.302809000  | H | 2.352484000  | 4.801147000  | 0.191972000  |
| H  | 3.144424000  | 1.837623000   | -2.440809000 | H | -2.924047000 | 2.875030000  | -2.173952000 | H  | -5.376126000 | -3.082714000 | 2.402048000  | H | 2.768619000  | 3.584544000  | 1.047367000  |
| C  | 3.736260000  | 1.821115000   | 0.812114000  | C | -5.113046000 | -1.984213000 | 0.764990000  | H  | -5.803442000 | -2.321030000 | 0.848830000  | C | 2.626589000  | 3.279719000  | -2.060226000 |
| C  | 2.886514000  | 2.448410000   | 1.338427000  | H | -5.016790000 | -1.680302000 | 1.816967000  | C  | -3.167734000 | 3.038711000  | 0.669050000  | C | 3.235584000  | 2.831265000  | -2.857902000 |
| H  | 1.840760000  | 2.582165000   | 1.625070000  | H | -5.553727000 | -2.991812000 | 0.737215000  | C  | -2.625805000 | 3.281963000  | 2.085451000  | H | 2.577993000  | 4.362284000  | -2.244646000 |
| H  | 3.291802000  | 3.440333000   | 2.181714000  | H | -5.807765000 | -1.290631000 | 0.275440000  | H  | -3.287333000 | 2.858401000  | 2.854550000  | H | 1.605797000  | 2.874990000  | -2.133350000 |
| H  | 2.899775000  | 1.856673000   | 2.861869000  |   |              |              |              | H  | -2.546675000 | 4.362320000  | 2.271317000  |   |              |              |              |

**Table S12:** Optimized geometries of **13-bent** (left) and **13-linear** (right). XYZ coordinated in angstroms. BP86/def2-TZVP level of theory.

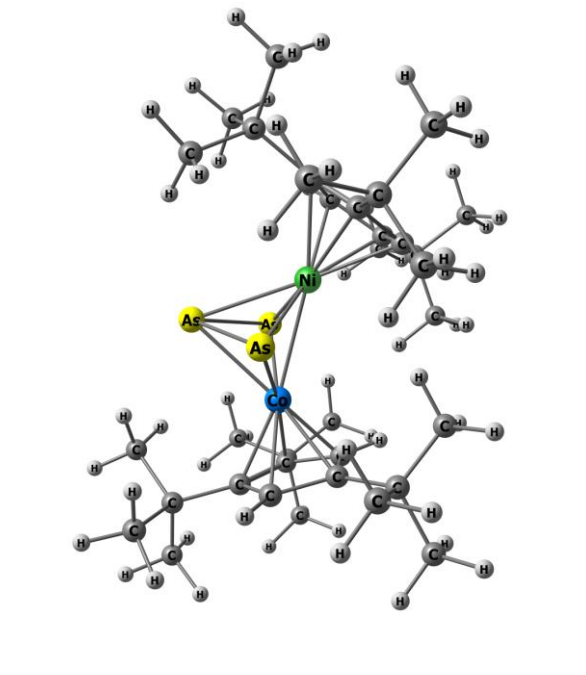


|    |              |              |              |   |              |              |              |    |              |              |              |
|----|--------------|--------------|--------------|---|--------------|--------------|--------------|----|--------------|--------------|--------------|
| Ni | 1.283474000  | -0.214423000 | -0.192371000 | C | -4.046294000 | -2.079289000 | -1.776675000 | H  | -1.694578000 | 2.844278000  | 2.259393000  |
| Co | -1.332584000 | 0.290059000  | 0.064361000  | H | -4.733527000 | -1.326666000 | -2.176114000 | C  | -2.230876000 | 3.720727000  | -0.322785000 |
| As | -0.430442000 | -1.293972000 | -1.321486000 | H | -4.470101000 | -3.066422000 | -2.010513000 | As | -0.101568000 | 0.707086000  | -1.352333000 |
| As | 0.336872000  | 1.870328000  | 0.117841000  | H | -3.085120000 | -1.995940000 | -2.307451000 | As | 0.002305000  | -1.413401000 | 0.013787000  |
| As | -0.131185000 | 0.970227000  | -2.059723000 | C | 5.557930000  | 0.586168000  | -1.670233000 | As | 0.084974000  | 0.708615000  | 1.359084000  |
| C  | -2.741768000 | 1.500700000  | 0.964210000  | H | 5.725489000  | 1.382998000  | -0.937218000 | C  | -3.633487000 | -0.450866000 | -0.800797000 |
| H  | -2.700806000 | 2.582311000  | 1.008297000  | H | 6.069575000  | 0.876205000  | -2.599874000 | C  | -3.581415000 | -0.761150000 | 0.643622000  |
| C  | -2.443038000 | -0.702035000 | 1.462083000  | H | 6.027964000  | -0.333255000 | -1.291462000 | C  | -3.421430000 | 0.494644000  | 1.324452000  |
| H  | -2.131589000 | -1.604568000 | 1.973889000  | C | -2.716092000 | 0.724437000  | 4.317658000  | H  | -3.241182000 | 0.609140000  | 2.398831000  |
| C  | -3.355959000 | 0.745501000  | -0.103036000 | H | -3.597589000 | 1.346410000  | 4.104925000  | C  | -3.310928000 | 1.564522000  | 0.384270000  |
| C  | 2.815212000  | -1.550162000 | -0.751595000 | H | -2.351273000 | 0.972567000  | 5.325390000  | C  | -3.459588000 | 0.964928000  | -0.913376000 |
| H  | 2.788721000  | -2.185096000 | -1.629056000 | H | -3.026308000 | -0.330315000 | 4.311934000  | H  | -3.426977000 | 1.510993000  | -1.849002000 |
| C  | 2.583921000  | -0.829241000 | 1.397257000  | C | 3.981208000  | 2.768953000  | 0.661757000  | C  | 3.613850000  | -0.487054000 | 0.793218000  |
| H  | 2.344477000  | -0.792201000 | 2.453508000  | C | 4.560292000  | 2.706704000  | -0.194270000 | C  | 3.543799000  | -0.792694000 | -0.645297000 |
| C  | -3.207481000 | -0.675158000 | 0.246727000  | H | 4.263799000  | 3.536095000  | 1.338917000  | C  | 3.411511000  | 0.471792000  | -1.326609000 |
| C  | 2.343611000  | -1.937738000 | 0.553445000  | H | 2.891883000  | 3.084474000  | 0.306397000  | H  | 3.330906000  | 0.589943000  | -2.400755000 |
| C  | 3.205090000  | 0.248033000  | 0.656171000  | C | -3.034520000 | -3.203084000 | 0.182547000  | C  | 3.337796000  | 1.538770000  | -0.384915000 |
| C  | 3.382733000  | -0.237957000 | -0.727489000 | H | -2.009588000 | -3.178208000 | -0.216854000 | C  | 3.463051000  | 0.933397000  | 0.011828000  |
| C  | -2.177132000 | 0.625583000  | 1.930406000  | H | -3.519166000 | -4.108689000 | -0.207489000 | H  | 3.441406000  | 1.476931000  | 1.849252000  |
| C  | 1.868003000  | -3.307195000 | 0.985971000  | H | -2.981330000 | -3.307556000 | 1.273977000  | C  | -3.870260000 | -1.312859000 | -2.043577000 |
| C  | -0.389559000 | 0.081940000  | 3.604618000  | C | 5.186997000  | 0.995857000  | 1.911403000  | C  | -2.703620000 | -2.275260000 | -2.336520000 |
| H  | -0.678420000 | -0.977050000 | 3.651448000  | H | 5.118143000  | 0.087659000  | 2.527409000  | H  | -1.801230000 | -1.706050000 | -2.595619000 |
| H  | 0.036272000  | 0.358646000  | 4.579515000  | H | 5.632864000  | 1.795569000  | 2.521313000  | H  | -2.962824000 | -2.918273000 | -3.192815000 |
| H  | 0.386690000  | 0.187271000  | 2.835908000  | H | 5.858755000  | 0.788742000  | 1.069408000  | H  | -2.457520000 | -2.925144000 | -1.489116000 |
| C  | -3.853310000 | -1.969936000 | -0.258230000 | C | 1.490465000  | -4.182248000 | -0.217370000 | C  | -5.205610000 | -2.078286000 | -1.899938000 |
| C  | -1.592541000 | 0.980992000  | 3.280830000  | H | 0.684972000  | -3.793722000 | -0.789013000 | H  | -5.187129000 | -2.822546000 | -1.098648000 |
| C  | -4.093864000 | 1.464845000  | -1.236832000 | H | 1.162890000  | -5.171767000 | 0.131062000  | H  | -5.424640000 | -2.607048000 | -2.839096000 |
| C  | 4.058145000  | 0.354217000  | -1.963901000 | H | 2.343030000  | -4.329241000 | -0.896135000 | H  | -6.031157000 | -1.380049000 | -1.699025000 |
| C  | -3.588294000 | 1.125474000  | -2.645995000 | C | 3.054757000  | -3.966721000 | 1.733297000  | C  | -4.005323000 | -0.412436000 | -3.296367000 |
| H  | -2.602488000 | 1.622231000  | -2.818903000 | H | 3.335540000  | -4.046650000 | 1.079541000  | H  | -4.838781000 | 0.298772000  | -3.197467000 |
| H  | -4.275117000 | 1.503586000  | -3.399497000 | H | 2.772199000  | -4.979253000 | 2.058222000  | H  | -4.199923000 | -1.047769000 | -4.166100000 |
| H  | -3.425265000 | 0.056057000  | -2.813866000 | H | 3.335779000  | -3.382320000 | 2.621091000  | H  | -3.080131000 | 0.148152000  | -3.489305000 |
| C  | 0.668793000  | -3.192261000 | 1.941778000  | C | -1.182085000 | 2.458227000  | 3.345936000  | C  | -3.177089000 | -2.034941000 | 1.486829000  |
| H  | 0.916823000  | -2.600492000 | 2.833610000  | H | -0.402339000 | 2.894590000  | 2.605964000  | C  | 3.024379000  | -1.910728000 | 2.815349000  |
| H  | 0.354474000  | -4.191812000 | 2.275084000  | H | -0.781807000 | 2.689918000  | 4.342715000  | H  | -1.951621000 | -1.725510000 | 2.654525000  |
| H  | -0.179538000 | -2.709074000 | 1.437956000  | H | -2.037680000 | 3.124767000  | 3.163602000  | H  | -3.131571000 | -2.853199000 | 3.370121000  |
| C  | 3.978715000  | -0.652197000 | -1.313024000 | C | -5.601806000 | 1.139960000  | -1.129454000 | H  | -3.425285000 | -1.111786000 | 3.452593000  |
| H  | 4.507941000  | -1.589514000 | -2.907887000 | H | -5.971824000 | 1.319487000  | -0.110189000 | C  | -3.269777000 | -3.331990000 | 0.818350000  |
| H  | 4.450153000  | -0.204620000 | -0.018482000 | H | -6.160569000 | 1.784848000  | -0.819276000 | H  | -3.793697000 | -3.586988000 | -0.107337000 |
| H  | 2.935203000  | -0.885299000 | -3.390568000 | H | -5.971824000 | 1.319487000  | -0.110189000 | H  | -3.426989000 | -4.162438000 | 1.521889000  |
| C  | 3.399986000  | 1.652663000  | -2.474694000 | C | -3.953691000 | 2.994302000  | -1.078405000 | H  | -2.191865000 | -3.273486000 | 0.606735000  |
| H  | 2.424440000  | 1.427382000  | -2.929810000 | H | -4.180240000 | 3.358685000  | -0.159902000 | C  | -5.289416000 | -2.153366000 | 1.767086000  |
| H  | 4.034981000  | 2.101390000  | -3.250300000 | H | -4.483646000 | 3.482720000  | -1.920767000 | H  | -5.849871000 | -1.862650000 | 2.302500000  |
| C  | 3.235636000  | 2.396987000  | -1.692300000 | H | -2.900628000 | 3.311346000  | -1.098989000 | H  | -5.471205000 | -3.034760000 | 2.400502000  |
| C  | 3.778240000  | 1.436600000  | 1.433217000  | C | -5.228640000 | -2.058578000 | 0.451815000  | H  | -5.878271000 | -2.260715000 | 0.847809000  |
| C  | 2.930403000  | 1.728565000  | 2.690225000  | H | -5.102093000 | -2.060090000 | 1.544008000  | C  | -3.187262000 | 3.041011000  | 0.673489000  |
| H  | 1.892212000  | 1.973470000  | 2.424076000  | H | -5.730910000 | -2.993612000 | 0.160599000  | C  | -2.800310000 | 3.289165000  | 2.105231000  |
| H  | 3.355693000  | 2.591530000  | 3.216430000  | H | -5.883792000 | -1.219602000 | 0.186247000  | C  | -3.375991000 | 2.866710000  | 2.854134000  |
| H  | 2.916295000  | 0.887281000  | 3.397706000  |   |              |              |              | H  | -2.613683000 | 4.368834000  | 2.291027000  |

**Table S13:** Optimized geometries of **14** (left) and **15** (right). XYZ coordinated in angstroms. BP86/def2-TZVP level of theory.

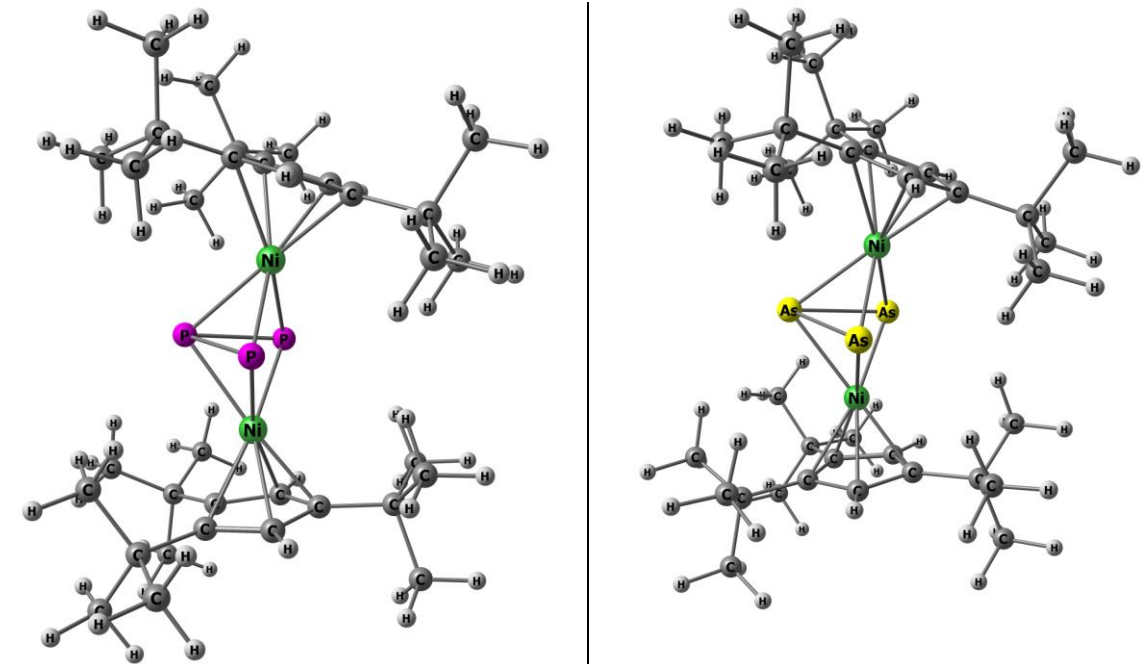

|    |              |              |              |   |              |              |              |    |               |              |              |   |              |              |              |
|----|--------------|--------------|--------------|---|--------------|--------------|--------------|----|---------------|--------------|--------------|---|--------------|--------------|--------------|
| Ni | -1.714762000 | 0.126347000  | 0.045996000  | H | -1.160886000 | 2.849532000  | 1.825393000  | As | -0.021717000  | 0.187213000  | 1.521157000  | C | 2.910330000  | -2.774484000 | 1.723849000  |
| Ni | 1.720626000  | 0.129803000  | -0.048310000 | C | -2.122429000 | 3.690227000  | -0.645466000 | As | 0.020496000   | 0.438863000  | -1.463787000 | H | 1.981001000  | -2.374068000 | 2.154248000  |
| P  | -0.037057000 | 0.290308000  | -1.334118000 | H | -1.133386000 | 2.119689000  | -0.748223000 | As | -0.007361000  | -1.628223000 | -0.142633000 | H | 3.248043000  | -3.608116000 | 2.357651000  |
| P  | 0.004884000  | -1.501320000 | -0.017271000 | H | -1.977616000 | 4.765470000  | -0.469292000 | Ni | -1.733297000  | 0.144864000  | -0.007857000 | H | 2.676779000  | -3.173046000 | 0.732872000  |
| P  | 0.042774000  | 0.260024000  | 1.337281000  | H | -2.657432000 | 3.576189000  | -1.598629000 | Ni | 1.730071000   | 0.140404000  | 0.040649000  | C | -4.079571000 | -0.725898000 | 3.232677000  |
| C  | -3.635480000 | -0.439656000 | -0.765019000 | C | -4.310620000 | 3.724759000  | 0.604531000  | C  | -3.109271000  | 1.674186000  | -0.118026000 | H | -4.351158000 | -1.458221000 | 4.006146000  |
| C  | -3.585685000 | -0.673586000 | 0.700010000  | H | -4.872058000 | 3.561179000  | -0.326030000 | C  | 3.636650000   | -0.439972000 | -0.745205000 | H | -4.844830000 | 0.063600000  | 3.230689000  |
| C  | -3.320629000 | 0.591542000  | 1.309924000  | H | -4.204471000 | 4.808274000  | 0.761060000  | C  | -3.330380000  | 0.911828000  | 1.083289000  | C | -3.114739000 | -0.284423000 | 3.521352000  |
| H  | -3.215341000 | 0.758318000  | 2.375141000  | H | -4.891003000 | 3.307044000  | 1.439184000  | H  | -3.257960000  | 1.314713000  | 2.086514000  | C | 5.378665000  | -2.279265000 | 1.360598000  |
| C  | -3.134635000 | 1.599442000  | 0.308120000  | C | 3.948854000  | -1.326110000 | 1.962871000  | C  | 3.097594000   | 1.674869000  | 0.142358000  | H | 5.393379000  | -2.802930000 | 0.399247000  |
| C  | -3.359000000 | 0.945361000  | -0.956978000 | C | 4.105592000  | -0.471298000 | 3.239730000  | C  | -3.635043000  | -0.542762000 | -0.709248000 | H | 5.655971000  | -3.005797000 | 2.138311000  |
| H  | -3.299690000 | 1.438619000  | -1.918946000 | H | 4.909352000  | 0.272552000  | 3.139147000  | C  | 3.340468000   | 0.763857000  | 1.226667000  | H | 6.146821000  | -1.494364000 | 1.339566000  |
| C  | 3.644815000  | -0.417819000 | 0.766528000  | H | 4.359368000  | -1.133219000 | 4.079594000  | H  | 3.261999000   | 1.026902000  | 2.274368000  | C | 3.493095000  | -2.866342000 | -1.619035000 |
| C  | 3.598276000  | -0.657384000 | -0.697522000 | H | 3.171873000  | 0.047409000  | 3.500739000  | C  | 3.316123000   | 0.918724000  | -1.059394000 | H | 4.001641000  | -3.342395000 | -0.775465000 |
| C  | 3.325686000  | 0.604772000  | -1.311818000 | C | 5.289360000  | -2.063593000 | 1.756705000  | H  | 3.221942000   | 1.317812000  | -2.062304000 | C | 3.704837000  | -3.477117000 | -2.512538000 |
| H  | 3.218698000  | 0.767388000  | -2.377369000 | H | 5.255701000  | -2.792839000 | 0.940565000  | C  | -3.329411000  | 0.767082000  | -1.203182000 | H | 2.408101000  | -2.902207000 | -1.438860000 |
| C  | 3.126814000  | 1.612299000  | -0.314181000 | H | 5.547267000  | -2.608630000 | 2.676446000  | H  | -3.241647000  | 1.029639000  | -2.250409000 | C | 4.092703000  | -1.132030000 | 3.139732000  |
| C  | 3.354891000  | 0.963555000  | 0.954450000  | H | 6.097852000  | -1.348702000 | 1.545053000  | C  | 3.997062000   | -1.677360000 | 1.697688000  | H | 4.870102000  | -0.360181000 | 3.235574000  |
| H  | 3.294498000  | 1.461714000  | 1.914813000  | C | 2.804762000  | -2.323375000 | 2.246743000  | C  | 3.956129000   | -1.423174000 | -1.872374000 | H | 4.352020000  | -1.959802000 | 3.814656000  |
| C  | -3.333315000 | -1.350497000 | -1.959765000 | H | 1.900476000  | -1.775219000 | 2.655922000  | H  | 2.839154000   | 3.156392000  | -0.198789000 | H | 3.134676000  | -0.715111000 | 3.482292000  |
| C  | -2.782287000 | -2.339666000 | -2.243446000 | H | 3.097903000  | -2.993384000 | 3.068804000  | C  | 3.663927000   | -0.535284000 | 0.731296000  | C | 3.270627000  | -0.973877000 | -3.182598000 |
| H  | -1.882477000 | -1.788497000 | -2.553162000 | H | 2.546023000  | -2.938574000 | 1.380653000  | C  | 2.189954000   | 3.508588000  | 1.598894000  | H | 2.178721000  | -0.905687000 | -3.061213000 |
| H  | -3.071020000 | -3.012634000 | -3.065114000 | C | 3.844833000  | -1.886076000 | -1.573527000 | H  | 1.892423000   | 4.587030000  | 1.642918000  | H | 3.478244000  | -1.716774000 | -3.965346000 |
| H  | -2.518619000 | -2.952843000 | -1.377259000 | C | 5.368923000  | -1.986333000 | -1.841437000 | H  | 2.850633000   | 3.260070000  | 2.441224000  | H | 3.642700000  | -0.066720000 | -3.546215000 |
| C  | -5.268579000 | -2.097109000 | -1.752070000 | H | 5.723714000  | -1.052191000 | -2.335215000 | C  | -3.659241000  | -0.442288000 | 0.765986000  | C | 4.210955000  | 3.854474000  | -1.033378000 |
| H  | -5.203161000 | -2.824487000 | -0.934534000 | H | 5.577595000  | -2.821343000 | -0.421639000 | C  | -3.899720000  | -1.665392000 | -1.703235000 | H | 4.682787000  | 3.514595000  | 0.933602000  |
| H  | -5.822314000 | -2.645638000 | -2.670984000 | H | 5.942744000  | -2.101791000 | -0.916454000 | C  | 5.497221000   | -1.384919000 | -2.107252000 | H | 4.082497000  | 4.942985000  | 0.230184000  |
| H  | -6.052066000 | -1.387419000 | -1.542164000 | C | 3.338997000  | -3.213519000 | -0.986466000 | H  | 5.810979000   | -0.365762000 | -2.363696000 | C | -5.387139000 | -2.068789000 | 0.171267000  |
| C  | -4.096983000 | -0.498930000 | -3.238099000 | H | 3.845343000  | -3.498449000 | -0.057976000 | H  | 5.748267000   | -2.051194000 | -2.943074000 | H | -5.414322000 | -2.691396000 | 1.612186000  |
| H  | -4.906568000 | 0.287811000  | -3.138761000 | H | 3.517775000  | -4.015497000 | -1.717173000 | H  | 6.047820000   | -1.707685000 | -1.221800000 | H | -6.148589000 | -1.282147000 | 1.506976000  |
| H  | -4.345632000 | -1.164407000 | -4.076736000 | H | 2.256110000  | -3.170966000 | -0.794852000 | C  | 2.829663000   | 3.155558000  | 0.247315000  | H | -5.666746000 | -2.704065000 | 2.465367000  |
| H  | -3.167410000 | 0.026512000  | -3.500177000 | C | 3.133085000  | -1.717044000 | -2.935128000 | C  | -3.953440000  | -1.448775000 | 1.871181000  | C | -3.519385000 | -3.072198000 | -1.252617000 |
| C  | -3.232855000 | -1.902450000 | 1.577889000  | H | 2.953358000  | -1.550475000 | -2.802941000 | C  | 1.921877000   | 3.644349000  | -0.893058000 | H | -3.742180000 | -3.784208000 | -2.060276000 |
| C  | -3.113489000 | -1.726426000 | 2.939168000  | H | 3.545435000  | -0.889274000 | -3.528910000 | H  | 1.797572000   | 4.734867000  | -0.830603000 | H | -4.048539000 | -3.415570000 | -0.358928000 |
| H  | -2.034647000 | -1.554365000 | 2.806743000  | C | 2.864164000  | 3.081183000  | -0.530702000 | H  | 0.928621000   | 3.181192000  | -0.820394000 | H | -2.437103000 | -3.114840000 | -1.059281000 |
| H  | -3.243446000 | -2.644381000 | 3.528890000  | C | 4.234875000  | 3.795498000  | -0.397706000 | H  | 2.339886000   | 3.408619000  | -1.862204000 | C | -4.194640000 | 3.866730000  | 0.054432000  |
| C  | -3.908738000 | -3.227034000 | 0.992263000  | H | 4.661185000  | 3.645298000  | 0.605167000  | C  | -3.205141000  | -1.404962000 | -3.038348000 | H | -4.942843000 | 3.562270000  | -0.691489000 |
| H  | -3.183480000 | -3.516292000 | 0.066115000  | H | 4.104818000  | 4.875241000  | -0.560622000 | H  | -3.999986000  | -2.242922000 | -3.722234000 | H | -4.059251000 | 4.956050000  | -0.013724000 |
| H  | -3.481654000 | -4.029517000 | 1.723830000  | H | 4.950379000  | 3.414571000  | -1.139707000 | H  | -2.117755000  | -1.335061000 | -2.883496000 | H | -4.584236000 | 3.626716000  | 1.053993000  |
| H  | -2.282699000 | -3.177252000 | 0.799959000  | C | 1.995337000  | 3.629355000  | 0.535113000  | H  | -3.547899000  | -0.490204000 | -3.538712000 | C | -1.927962000 | 3.589104000  | 0.876832000  |
| C  | -5.347327000 | -1.995160000 | 1.845698000  | H | 0.917400000  | 3.142009000  | 0.345241000  | C  | -5.463570000  | -1.633004000 | -1.985030000 | H | -2.167317000 | 3.327391000  | 1.886883000  |
| H  | -5.708366000 | -1.081545000 | 2.339538000  | H | 1.762873000  | 4.710959000  | 0.394144000  | H  | -5.761619000  | -0.651849000 | -2.382094000 | H | -1.682261000 | 4.678023000  | 0.839123000  |
| H  | -5.550560000 | -2.849774000 | 2.508034000  | H | 2.277106000  | 3.465979000  | 1.553913000  | H  | -6.052711000  | -1.628579000 | -1.080472000 | H | -0.856868000 | 3.102388000  | 0.706111000  |
| H  | -5.320395000 | -2.132130000 | 0.920470000  | C | 2.284205000  | 3.339865000  | -1.928892000 | H  | -5.1751281000 | -2.399485000 | -2.733610000 | C | -2.305236000 | 3.548632000  | -1.585510000 |
| C  | -2.903335000 | 3.073009000  | 0.526778000  | H | 2.978995000  | 3.031584000  | -2.723142000 | C  | -2.921901000  | -2.547212000 | 2.029430000  | H | -1.375518000 | 3.013095000  | -1.816583000 |
| C  | -2.150160000 | 3.330726000  | 1.840686000  | H | 2.085203000  | 4.413253000  | -2.056361000 | H  | -1.982371000  | -2.104672000 | 2.390795000  | H | -2.099448000 | 4.627138000  | -1.613925000 |
| H  | -2.702058000 | 2.950340000  | 2.711815000  | H | 1.337433000  | 2.795709000  | -2.068332000 | H  | -2.706393000  | -3.078603000 | 1.098536000  | H | -3.037306000 | 3.326636000  | -2.378589000 |
| H  | -2.066269000 | 4.411462000  | 1.980830000  |   |              |              |              | H  | -3.259818000  | -3.262945000 | 2.774652000  |   |              |              |              |

**Table S14:** Optimized geometries of **16** (left) and **17** (right). XYZ coordinated in angstroms. BP86/def2-TZVP level of theory.

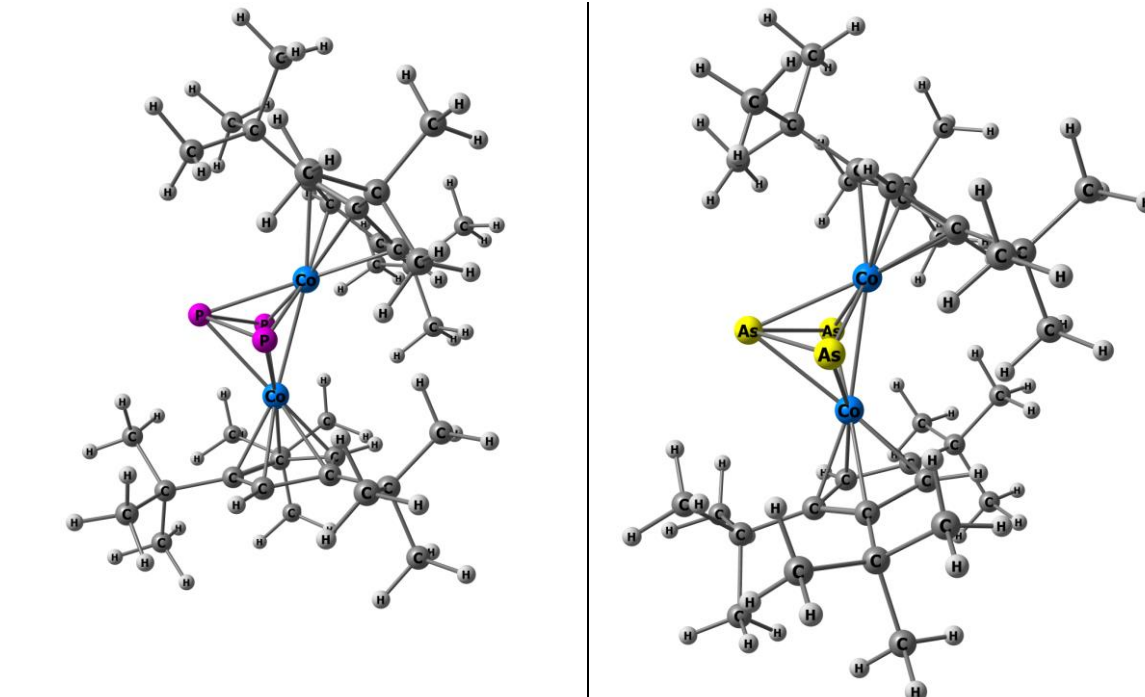

|    |              |              |              |   |              |              |              |    |              |              |              |   |               |              |              |
|----|--------------|--------------|--------------|---|--------------|--------------|--------------|----|--------------|--------------|--------------|---|---------------|--------------|--------------|
| Co | 1.264962000  | -0.289011000 | -0.234506000 | C | -3.866677000 | -2.740358000 | -0.859194000 | As | 0.411299000  | -1.735590000 | -0.617885000 | C | 3.781918000   | 2.095327000  | -2.483231000 |
| Co | -1.264841000 | 0.288854000  | -0.234654000 | H | -4.542033000 | -2.278578000 | -1.585812000 | As | -0.411390000 | 1.738208000  | -0.612126000 | H | 4.239159000   | 2.117858000  | -3.482412000 |
| P  | -0.367408000 | -1.603422000 | -0.811890000 | H | -4.275695000 | -3.731495000 | -0.615872000 | As | -0.000165000 | 0.003796000  | -2.228069000 | H | 4.266744000   | 2.873457000  | -1.876966000 |
| P  | 0.367515000  | 1.602789000  | -0.813061000 | H | -2.896830000 | -2.893038000 | -1.335198000 | Co | -1.287532000 | -0.302261000 | -0.074397000 | H | 2.716306000   | 2.343839000  | -2.597489000 |
| Co | -0.000607000 | -0.000644000 | -2.528202000 | C | 5.466591000  | -0.333863000 | -1.870135000 | Co | 1.287548000  | 0.303266000  | -0.073776000 | C | 0.520521000   | 1.819862000  | 3.215840000  |
| C  | -2.722664000 | 1.741372000  | -0.078516000 | H | 5.661396000  | 0.707319000  | -1.591399000 | C  | -2.717938000 | -1.772336000 | 0.091406000  | H | -0.314081000  | 1.608736000  | 2.535455000  |
| H  | -2.674684000 | 2.070568000  | -0.559818000 | H | 5.990170000  | -0.531361000 | -2.816802000 | H  | -2.667400000 | -2.745805000 | -0.381187000 | H | 0.175353000   | 2.521225000  | 3.986648000  |
| C  | -2.450320000 | 0.053938000  | 1.425562000  | H | 5.899863000  | -0.964470000 | -1.096368000 | C  | -3.291793000 | -0.594530000 | -0.516892000 | H | 0.803138000   | 0.881630000  | 3.712486000  |
| H  | -2.167495000 | -0.486874000 | 2.321533000  | C | -2.876221000 | 2.732330000  | 3.194222000  | C  | 3.292134000  | 0.595665000  | -0.515139000 | C | -5.209635000  | 1.800174000  | 1.272681000  |
| C  | -3.281529000 | 0.554264000  | -0.681652000 | H | -3.724573000 | 3.161051000  | 2.641278000  | C  | -2.209585000 | -1.469573000 | 1.388311000  | H | -5.852393000  | 0.983461000  | 0.632218000  |
| C  | 2.722750000  | -1.741501000 | -0.076555000 | H | -2.560315000 | 3.455450000  | 3.960274000  | C  | -3.173047000 | 0.487253000  | 0.469802000  | H | -5.719445000  | 2.558453000  | 1.452831000  |
| H  | 2.674766000  | -2.711155000 | -0.556929000 | H | -3.218640000 | 1.818440000  | 3.709805000  | C  | 2.718911000  | 1.771811000  | 0.096763000  | H | -5.092016000  | 1.084385000  | 2.236642000  |
| C  | 2.450398000  | -0.052499000 | 1.425703000  | C | 3.866093000  | 2.738777000  | -0.861854000 | H  | 2.869037000  | 2.746771000  | -0.372848000 | C | 3.420110000   | -0.303584000 | -2.930680000 |
| H  | 2.167724000  | 0.489224000  | 2.321116000  | H | 4.542377000  | 2.276652000  | -1.587837000 | C  | 3.172643000  | -0.489253000 | 0.468138000  | H | 2.447173000   | 0.048083000  | -3.303058000 |
| C  | -3.143160000 | -0.528612000 | 0.306639000  | H | 4.275889000  | 3.730684000  | -0.619593000 | C  | 2.210134000  | 1.465248000  | 1.392599000  | H | 3.279432000   | -1.315003000 | -2.545507000 |
| C  | 2.210846000  | -1.450654000 | 1.219622000  | H | 2.887145000  | 2.891418000  | -1.338216000 | C  | -2.463645000 | -0.074849000 | 1.587929000  | H | 4.107356000   | -0.349676000 | -3.788431000 |
| C  | 3.143191000  | 0.523860000  | 0.308306000  | C | -2.895259000 | -2.789415000 | 1.406825000  | H  | -2.190340000 | 0.473009000  | 2.482423000  | C | -4.019511000  | 2.882155000  | -0.864055000 |
| C  | 3.281767000  | -0.555056000 | -0.680890000 | H | -1.857446000 | -2.907540000 | 1.044948000  | C  | 2.463307000  | 0.069741000  | 1.587863000  | H | -3.052795000  | 2.890258000  | -1.153064000 |
| C  | -2.211037000 | 1.451782000  | 1.218080000  | H | -3.333717000 | -3.792011000 | 1.473215000  | H  | 2.189308000  | -0.480709000 | 2.480549000  | H | -4.471055000  | 3.648752000  | -0.480222000 |
| C  | 1.689353000  | -2.427560000 | 2.248883000  | H | -2.859110000 | -2.379482000 | 2.424420000  | C  | -3.971498000 | -0.680690000 | -1.886575000 | H | -4.677705000  | 2.194277000  | -1.387174000 |
| C  | -0.538669000 | 1.812311000  | 3.052742000  | C | 5.132153000  | 1.744943000  | 1.079945000  | C  | 1.700235000  | 2.426802000  | 2.441786000  | C | -1.283698000  | -3.774203000 | 1.813782000  |
| H  | -0.859302000 | 0.908007000  | 3.587597000  | H | 5.049429000  | 1.232333000  | 2.048348000  | C  | -3.971825000 | 0.685643000  | -1.884593000 | H | -0.835290000  | -4.457351000 | -2.801388000 |
| H  | -0.172521000 | 2.533483000  | 3.797148000  | H | 5.591548000  | 2.730162000  | 1.248339000  | C  | -1.699654000 | -2.434262000 | 2.434643000  | H | -0.461860000  | -3.646922000 | 1.092556000  |
| H  | 0.290895000  | 1.541197000  | 2.387759000  | H | 5.801967000  | 1.157598000  | 0.439627000  | C  | -2.881249000 | -2.674439000 | 3.408436000  | H | -1.2121036000 | -4.259791000 | 1.292723000  |
| C  | -3.733289000 | -1.932122000 | 0.439123000  | C | 1.222876000  | -3.734708000 | 1.591068000  | H  | -2.578205000 | -3.388530000 | 4.185129000  | C | 3.022948000   | -2.759917000 | 1.591040000  |
| C  | -1.898918000 | 2.429794000  | 2.244539000  | H | 0.403474000  | -3.655348000 | 0.877893000  | H  | -3.769903000 | -3.088523000 | 2.878006000  | H | 2.968315000   | -2.536212000 | 2.603199000  |
| C  | -3.958375000 | 0.624404000  | -2.053814000 | H | 0.855568000  | -4.426742000 | 2.362071000  | H  | -3.187551000 | -1.738017000 | 3.896539000  | H | 3.516948000   | -3.730720000 | 1.670666000  |
| C  | 3.958821000  | -0.626625000 | -2.052783000 | H | 2.040312000  | -4.234696000 | 1.052242000  | C  | -3.826742000 | 1.866294000  | 0.622182000  | H | 1.998693000   | -2.932930000 | 1.230590000  |
| C  | -3.39254000  | -0.320560000 | -3.103068000 | C | 2.875525000  | -2.729099000 | 3.197220000  | C  | -3.781228000 | -2.088448000 | -2.488658000 | C | -3.023818000  | 2.751826000  | 1.599606000  |
| H  | -2.366843000 | 0.071339000  | -3.434688000 | H | 3.723899000  | -3.158465000 | 2.644972000  | H  | -4.238620000 | -2.109086000 | -3.488837000 | H | 2.269450000   | 2.325920000  | 2.610177000  |
| H  | -3.996191000 | -0.368293000 | -3.984113000 | H | 2.559369000  | -3.451451000 | 3.963896000  | H  | -4.265708000 | -2.868618000 | -1.885641000 | H | -3.517720000  | 3.729841000  | 1.681140000  |
| H  | -3.179653000 | -1.336042000 | -2.735170000 | H | 3.217832000  | -1.814669000 | 3.928860000  | H  | -2.715690000 | -2.336300000 | -2.604897000 | H | -1.999429000  | 2.928623000  | 1.239273000  |
| C  | 0.537937000  | -1.809321000 | 3.054127000  | C | -1.223080000 | 3.736286000  | 1.587561000  | C  | -3.420385000 | 0.312064000  | -2.929619000 | C | 2.881861000   | 2.864200000  | 3.416251000  |
| H  | 0.856351000  | -0.904361000 | 3.589023000  | H | -0.403371000 | 3.556834000  | 0.874911000  | H  | -2.447170000 | -0.037740000 | -3.303107000 | H | 3.182300000   | 1.726341000  | 3.901563000  |
| H  | 0.171704000  | -2.529702000 | 3.799258000  | H | -0.856118000 | 4.429121000  | 2.358080000  | H  | -3.280450000 | 1.322465000  | -2.541120000 | H | 2.578980000   | 3.376017000  | 4.198073000  |
| H  | -0.291500000 | -1.539082000 | 2.388623000  | H | -2.040307000 | 4.235705000  | 1.047890000  | H  | -4.107605000 | 0.360232000  | -3.787358000 | H | 3.751479000   | 3.079910000  | 2.887027000  |
| C  | 3.843451000  | -2.052650000 | -2.631935000 | C | 5.466189000  | 0.332016000  | -1.871005000 | C  | 1.284203000  | 3.769546000  | 1.824828000  | C | 5.209116000   | -1.604813000 | 1.267951000  |
| H  | 4.358837000  | -2.798522000 | -2.007741000 | H | -5.061121000 | -0.708852000 | -1.591168000 | H  | 2.121218000  | 4.255141000  | 1.304186000  | H | 5.851805000   | -0.982630000 | 0.629413000  |
| H  | 4.313182000  | -2.066576000 | -3.625375000 | H | -5.989650000 | 0.528546000  | -2.817940000 | H  | 0.936864000  | 4.449777000  | 2.614558000  | H | 5.718816000   | -2.563688000 | 1.243341000  |
| H  | 2.793704000  | -2.565840000 | -2.758885000 | H | -5.899506000 | 0.983487000  | -1.097979000 | H  | -4.661597000 | 3.643491000  | 1.104075000  | H | 5.091172000   | -1.091847000 | 2.443300000  |
| C  | 3.339655000  | 0.317123000  | -3.103095000 | C | -3.842736000 | 2.049771000  | -2.634418000 | C  | -0.819860000 | -1.829399000 | 3.210335000  | C | 4.015059000   | -2.681325000 | -0.671903000 |
| H  | 2.367421000  | -0.075365000 | -3.434529000 | H | -4.358146000 | 2.794395000  | -2.011260000 | H  | -0.802190000 | -0.892461000 | 3.709212000  | H | 3.051864000   | -2.887907000 | -1.161516000 |
| H  | 3.996743000  | 0.384183000  | -3.984075000 | H | -4.312270000 | 2.828711000  | 2.358076000  | H  | 0.314914000  | -1.615068000 | 2.530576000  | H | 4.469820000   | -3.648780000 | -0.414255000 |
| H  | 3.179679000  | 1.332912000  | -2.736216000 | H | -2.792923000 | 2.353424000  | -2.785876000 | H  | -0.175147000 | -2.532941000 | 3.981467000  | H | 4.676301000   | -2.191839000 | -1.393757000 |
| C  | 3.732599000  | 1.932518000  | 0.437356000  | C | -5.132306000 | -1.743794000 | 1.081221000  | C  | 3.826050000  | -1.868820000 | 0.616555000  | C | 5.491891000   | 0.475100000  | -1.686556000 |
| C  | 2.889955000  | 2.790860000  | 1.403913000  | H | -5.049749000 | -1.230120000 | 2.050074000  | H  | -5.491639000 | -0.471269000 | -1.687860000 | H | 6.012907000   | 0.889920000  | -2.630684000 |
| H  | 1.857221000  | 2.908546000  | 1.041727000  | H | -5.591759000 | -2.729819000 | 1.250680000  | H  | -6.012684000 | -0.883382000 | -2.632577000 | H | 5.736390000   | -0.552744000 | -1.385409000 |
| H  | 3.333838000  | 3.793563000  | 1.469234000  | H | -5.801976000 | -1.157141000 | 0.440121000  | H  | -5.736420000 | 0.555344000  | -1.393351000 | H | 5.883074000   | 1.154289000  | -0.914980000 |
| H  | 2.858677000  | 2.382099000  | 2.421971000  |   |              |              |              |    |              |              |              |   |               |              |              |

**Table S15:** Optimized geometries of **18** (left) and **18-I** (right). XYZ coordinated in angstroms. BP86/def2-TZVP level of theory.

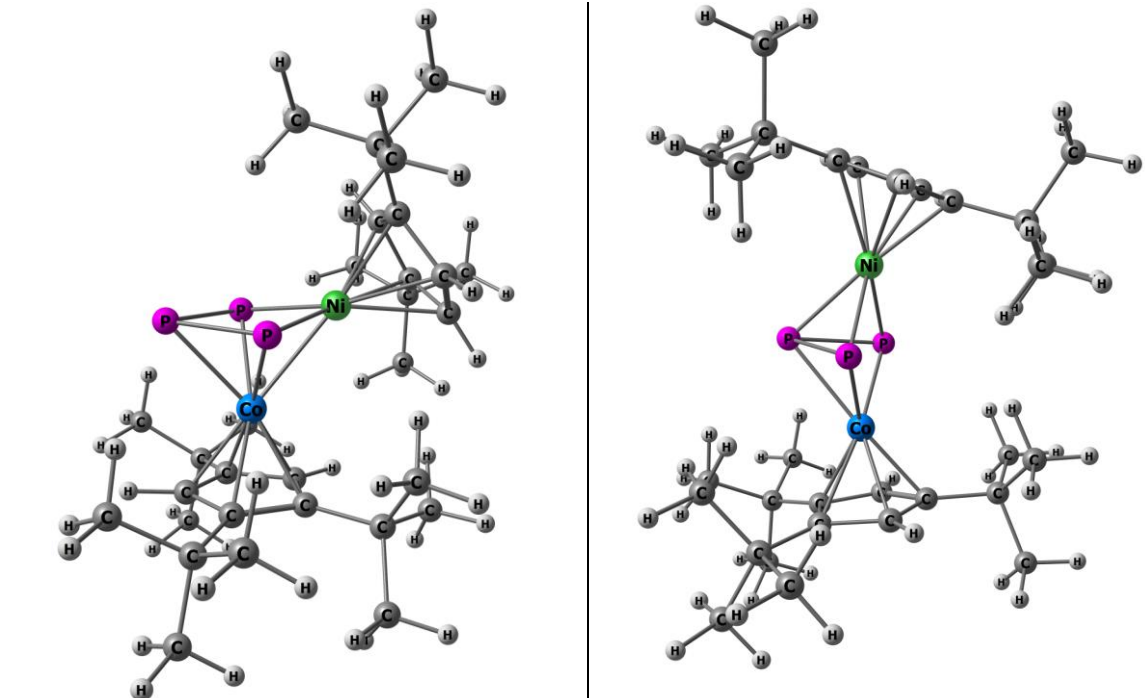

|    |              |              |              |   |              |              |              |    |              |              |              |   |              |              |              |
|----|--------------|--------------|--------------|---|--------------|--------------|--------------|----|--------------|--------------|--------------|---|--------------|--------------|--------------|
| Ni | -1.441337000 | -0.220666000 | -0.082360000 | H | -3.969135000 | -4.262437000 | -0.816817000 | Ni | 1.994227000  | -0.188161000 | 0.479678000  | H | -2.316380000 | -2.966582000 | 1.316996000  |
| Co | 1.052200000  | -0.070130000 | -0.516914000 | H | -3.702762000 | -3.654042000 | 0.831935000  | Co | -1.309352000 | 0.153727000  | 0.085019000  | H | -3.838820000 | -3.277265000 | 0.441328000  |
| P  | -0.559880000 | 0.798536000  | -1.782806000 | C | 1.464939000  | 3.768027000  | -0.798795000 | P  | 0.205690000  | 0.512604000  | 1.587781000  | H | -3.777569000 | -3.471528000 | 2.197112000  |
| P  | -0.191913000 | -1.887868000 | -0.723023000 | H | 0.473014000  | 3.353134000  | -1.031230000 | P  | 0.169200000  | -1.568660000 | 0.838947000  | H | -1.282460000 | -2.385814000 | -2.038660000 |
| C  | 0.428363000  | -0.950617000 | -2.589921000 | H | 1.579628000  | 4.715603000  | -1.345676000 | P  | 0.418466000  | -0.432258000 | -1.054354000 | H | -2.568363000 | -3.524658000 | -2.519050000 |
| C  | 1.866755000  | 1.250341000  | 0.814758000  | H | 1.504415000  | 3.994589000  | 0.276495000  | C  | -3.825367000 | -0.395599000 | 0.559416000  | H | -2.278096000 | -3.160326000 | -0.802265000 |
| H  | 1.311495000  | 1.990415000  | 1.378350000  | C | 2.510355000  | 2.567776000  | -2.734229000 | C  | -3.076320000 | -0.451068000 | -0.898220000 | H | -4.975927000 | -2.573814000 | -0.936707000 |
| C  | 2.882105000  | -0.755472000 | 0.199665000  | H | 3.286795000  | 1.870253000  | -3.078764000 | C  | -2.847843000 | 0.855750000  | -1.288614000 | H | -4.538057000 | -2.764793000 | -2.699539000 |
| C  | 2.117394000  | -0.105724000 | 1.282789000  | H | 2.860965000  | 3.524566000  | -3.296263000 | C  | -2.989590000 | 1.733578000  | -0.146468000 | H | -5.454950000 | -1.218227000 | -1.973269000 |
| C  | 3.053172000  | 0.237546000  | -0.834967000 | H | 1.530128000  | 2.164048000  | -3.028433000 | C  | -3.022627000 | 0.954626000  | 0.966863000  | H | -3.775642000 | -0.156545000 | -3.576144000 |
| C  | 3.553363000  | 0.055248000  | -1.780196000 | C | -2.947491000 | 3.355949000  | -0.419766000 | C  | -3.805214000 | -1.395657000 | 1.598527000  | H | -3.263934000 | -1.779324000 | -4.096943000 |
| H  | 2.457143000  | 1.478489000  | -0.461558000 | H | -2.153788000 | 3.008012000  | -1.097896000 | C  | -5.348195000 | -1.272046000 | 1.634826000  | H | -2.051718000 | -0.625709000 | -3.501110000 |
| C  | -3.432023000 | 0.428334000  | -0.212130000 | H | -2.870740000 | 4.449649000  | -0.328974000 | C  | -3.267448000 | -1.034400000 | 3.002180000  | H | -2.700218000 | 3.572413000  | 1.952266000  |
| C  | -3.851417000 | 0.839147000  | -1.125049000 | H | -3.918093000 | 3.125026000  | -0.882861000 | C  | -3.410519000 | -2.860708000 | 1.358602000  | H | -1.643845000 | 4.784782000  | 1.194910000  |
| C  | -2.770949000 | -1.058719000 | 1.419418000  | C | 0.732053000  | -1.713106000 | 2.719826000  | C  | -3.293151000 | -1.554672000 | -1.941449000 | H | -0.997090000 | 3.174289000  | 1.611288000  |
| H  | -2.867023000 | -1.875172000 | 1.965444000  | H | -0.217473000 | -1.399055000 | 2.268529000  | C  | -2.901129000 | -2.729319000 | -1.805884000 | H | -0.207366000 | 2.939963000  | -0.824912000 |
| C  | -2.964948000 | 1.193362000  | 0.899638000  | H | 0.546506000  | -2.003871000 | 3.765670000  | C  | -4.751259000 | -2.057961000 | -1.876756000 | H | -0.873518000 | 4.567102000  | -1.151768000 |
| C  | -2.817204000 | 2.704662000  | 0.966670000  | H | 1.080165000  | -2.592862000 | 2.174603000  | C  | -3.082664000 | -0.982977000 | -3.360071000 | H | -1.348937000 | 3.184395000  | -2.165290000 |
| C  | -2.459262000 | 0.256342000  | 1.861320000  | C | -3.999821000 | 3.157586000  | 1.853615000  | C  | -2.262819000 | 3.209316000  | -0.167320000 | H | -3.824412000 | 3.164380000  | -1.655807000 |
| H  | -1.878177000 | 0.501258000  | 2.803899000  | H | -4.958705000 | 2.842446000  | 1.415691000  | C  | -1.880002000 | 3.711003000  | 1.233193000  | H | -3.347310000 | 5.036543000  | -0.682940000 |
| C  | 2.571752000  | 2.787796000  | -1.213228000 | H | -4.007399000 | 4.254805000  | 1.949945000  | C  | -1.104033000 | 3.491136000  | -1.138140000 | H | -4.376410000 | 3.765351000  | 0.032350000  |
| C  | -3.379261000 | -0.974370000 | 0.117802000  | H | -3.923710000 | 2.722162000  | 2.681079000  | C  | -3.532478000 | 3.951950000  | -0.648728000 | H | 3.718365000  | -0.018996000 | -1.777911000 |
| C  | 3.1611431000 | -2.099490000 | 0.058441000  | C | 3.017571000  | -0.892510000 | 3.468216000  | C  | 3.862768000  | -0.671403000 | 1.504241000  | H | 3.493806000  | 1.377390000  | 2.369046000  |
| C  | -0.198488000 | -2.094404000 | -0.677495000 | H | 3.518457000  | -1.786317000 | 3.079813000  | C  | 3.927530000  | -1.141526000 | 0.148982000  | H | 5.946508000  | -3.784232000 | -0.755808000 |
| C  | 1.059738000  | 0.627577000  | 3.425714000  | H | 2.764466000  | -1.081790000 | 4.522515000  | C  | 3.736892000  | -0.001782000 | -0.892973000 | H | 6.204263000  | -2.599980000 | 0.554392000  |
| H  | 1.736870000  | 1.485923000  | 3.545231000  | H | 3.733369000  | -0.057634000 | 3.432607000  | C  | 3.925271000  | 1.170784000  | 0.120265000  | H | 6.151237000  | -2.053844000 | -1.140840000 |
| H  | 0.760490000  | 0.291187000  | 4.428824000  | C | -1.496747000 | 3.156626000  | 1.612635000  | C  | 3.819357000  | 0.730440000  | 1.491248000  | H | 2.528907000  | -3.441426000 | -1.104240000 |
| H  | 0.156891000  | 0.962051000  | 2.897719000  | H | -1.378970000 | 2.742999000  | 2.625672000  | C  | 4.187183000  | -2.563357000 | -0.308047000 | H | 4.076681000  | -3.456829000 | 1.696373000  |
| C  | -3.755671000 | -1.914100000 | -2.183032000 | H | -1.465674000 | 4.253853000  | 1.693960000  | C  | 5.716876000  | -2.761195000 | -0.418695000 | H | 3.811136000  | -4.595959000 | 0.361860000  |
| H  | -4.125444000 | -0.943854000 | -2.545700000 | H | -0.643331000 | 2.829486000  | 1.005700000  | C  | 3.816141000  | -3.572123000 | 0.704440000  | H | 3.718493000  | -3.853264000 | -1.998214000 |
| H  | -4.266365000 | -2.705162000 | -3.753196000 | C | 3.886297000  | -2.510766000 | -1.428480000 | C  | 3.539173000  | -2.814506000 | -1.680633000 | H | 3.956968000  | -2.153551000 | -2.453912000 |
| H  | -2.778690000 | -1.964979000 | -2.394110000 | C | 2.678883000  | -2.604118000 | -1.858308000 | C  | 3.389518000  | 2.595256000  | -0.372995000 | H | 2.452723000  | -2.644614000 | -1.635998000 |
| C  | -5.544077000 | -2.032078000 | -0.416297000 | H | 4.189667000  | -3.485492000 | -1.504202000 | C  | 2.718702000  | 2.628769000  | -1.756374000 | H | 1.722129000  | 2.165599000  | -1.713795000 |
| H  | -5.781924000 | -2.144685000 | 0.656269000  | H | 4.2571082000 | -1.800304000 | -2.039985000 | C  | 2.562153000  | 3.440700000  | 0.609312000  | H | 3.313827000  | 2.091135000  | -2.508502000 |
| H  | -6.057353000 | -2.840007000 | -0.960392000 | C | 5.057109000  | -1.872509000 | 0.568110000  | C  | 4.814414000  | 3.190163000  | -0.481919000 | H | 2.605769000  | 3.668828000  | -2.098833000 |
| H  | -5.860718000 | -1.070813000 | -0.751664000 | H | 5.554339000  | -1.079283000 | -0.009385000 | H  | -2.387222000 | 1.154886000  | -2.298364000 | H | 1.550963000  | 3.024073000  | 0.723088000  |
| C  | 2.983059000  | -3.284375000 | 0.798299000  | H | 5.639886000  | -2.799408000 | 0.455274000  | H  | -3.070184000 | 1.315687000  | 1.897455000  | H | 2.472998000  | 4.471960000  | 0.236337000  |
| H  | 2.801153000  | -3.161521000 | 1.886075000  | H | 5.071496000  | -1.581759000 | 1.628862000  | H  | -5.800752000 | -1.542031000 | 0.671672000  | H | 3.029910000  | 3.482034000  | 1.603897000  |
| H  | 3.564359000  | -4.191081000 | 0.573375000  | C | 3.950530000  | 3.386357000  | -0.840911000 | H  | -5.648213000 | -0.241232000 | 1.874405000  | H | 4.767392000  | 4.228539000  | -0.844865000 |
| H  | 1.949986000  | -3.448852000 | 0.458198000  | H | 4.024987000  | 3.551807000  | 0.244142000  | H  | -5.758949000 | -1.940655000 | 2.407294000  | H | 5.429083000  | 2.606086000  | -1.182810000 |
| C  | 1.733936000  | -0.544029000 | 2.681519000  | H | 4.095302000  | 4.351907000  | -1.349302000 | H  | -3.606773000 | -1.793415000 | 3.722181000  | H | 5.314267000  | 3.187695000  | 0.497992000  |
| C  | -3.488618000 | -3.465024000 | -0.230414000 | H | 4.765180000  | 2.710954000  | -1.141726000 | H  | -3.634257000 | -0.062182000 | 3.357559000  | H | 3.936242000  | -1.286990000 | 2.396533000  |
| H  | -2.400128000 | -3.535260000 | -0.381024000 |   |              |              |              | H  | -2.167734000 | -1.015603000 | 3.012191000  |   |              |              |              |



**Table S16:** Optimized geometries of **19** (left) and **20** (right). XYZ coordinated in angstroms. BP86/def2-TZVP level of theory.

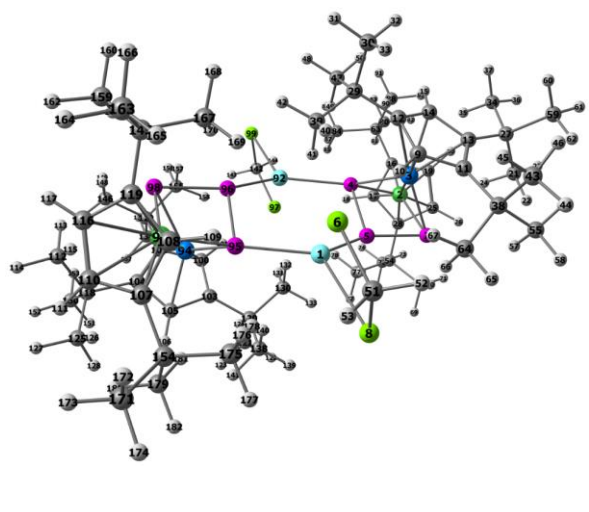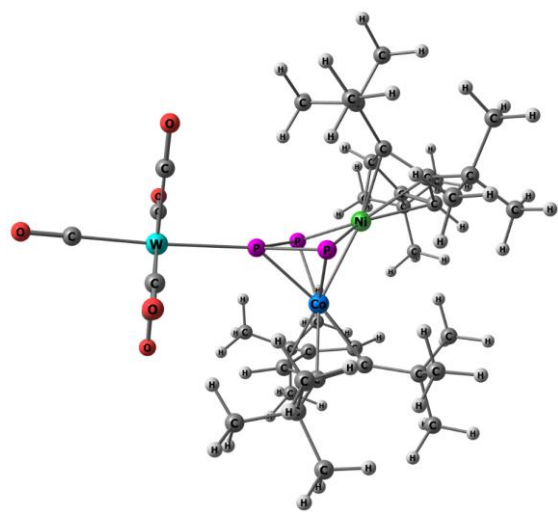

|    |             |              |             |    |             |             |             |    |             |             |             |   |             |             |             |
|----|-------------|--------------|-------------|----|-------------|-------------|-------------|----|-------------|-------------|-------------|---|-------------|-------------|-------------|
| Ag | 0.32852000  | -1.70261100  | 1.08566800  | Ag | -0.32878200 | 1.70293500  | -1.08664800 | W  | -3.64415700 | -1.11505700 | 0.04151000  | H | 4.52483300  | 2.98250200  | -1.61895900 |
| Ni | -4.38076400 | 0.98939000   | 0.59312700  | Ni | 4.38079900  | -0.98980700 | -0.59350300 | Ni | 1.92251400  | -0.69815200 | 0.23399700  | H | 3.54437000  | 1.72447700  | -0.81887800 |
| Co | -3.47860400 | -1.19810400  | -0.26599500 | Co | 3.47840600  | 1.19806500  | 0.26612100  | Co | 0.31440400  | 1.35656100  | 0.08748500  | C | -0.27892800 | 3.30259500  | 2.80728300  |
| P  | -2.42039000 | 0.75051000   | -0.28404600 | P  | 2.42028500  | -0.75024400 | 0.28421600  | P  | 0.30393800  | -0.25786300 | 1.65650200  | C | -0.49539800 | 4.83099500  | 2.95499500  |
| P  | -1.82598700 | -0.63368200  | 1.26769800  | P  | 1.82568200  | 0.63363300  | -1.26738900 | P  | -1.12948000 | -0.52987700 | 0.07728300  | H | 0.40288400  | 5.39304500  | 2.64916500  |
| Cl | 0.83750400  | -4.35233000  | -0.13407800 | Cl | -0.83698200 | 4.35265900  | 0.13497800  | P  | 0.45533400  | -0.36346400 | -1.37387000 | H | -0.71784000 | 5.08538700  | 4.00427800  |
| P  | -3.93116100 | -0.76406400  | 1.87033500  | P  | 3.93086000  | 0.76439600  | -1.87033500 | O  | -2.79132000 | -0.04269900 | -1.03934700 | H | -1.33950100 | 5.17629000  | 2.33639700  |
| Cl | 0.56852300  | -4.06260700  | 2.82898400  | Cl | -0.56779200 | 4.06332800  | -2.82758300 | O  | -3.36491100 | -2.14756500 | 3.09074500  | C | -1.55907800 | 2.57347000  | 3.25704300  |
| C  | -2.74483500 | -2.95098500  | -1.03612000 | C  | 2.74472200  | 2.95091100  | 1.03632700  | O  | -4.44169700 | 1.81214500  | 1.12333500  | H | -2.43840200 | 2.87200200  | 2.66755000  |
| H  | -1.77082800 | -3.37450500  | -0.74363200 | H  | 1.77080100  | 3.37452000  | 0.74363200  | O  | -3.94221000 | -0.10530200 | -3.00769900 | H | -1.77489100 | 2.81314200  | 4.31040500  |
| C  | -3.97486000 | -2.20321200  | -0.28022500 | C  | 3.97494100  | 2.20311900  | 0.28027900  | O  | -6.70208800 | -1.99744100 | 0.03467600  | H | -1.44711900 | 1.48171600  | 3.17580000  |
| C  | -2.96677000 | -2.05537000  | -2.09949100 | C  | 2.96636100  | 2.05507400  | 2.09961000  | C  | -3.99222600 | -3.00257200 | -0.65652400 | C | 0.89032400  | 2.89013300  | 3.71290000  |
| C  | -5.01232300 | -2.40435000  | -0.34596200 | C  | 5.01217300  | 2.40405500  | 0.34592800  | C  | -3.45721100 | -1.77899700 | 2.00713000  | H | 1.08476800  | 1.80054300  | 3.63657000  |
| C  | -4.35224600 | -1.70129700  | -2.03615300 | C  | 4.35181300  | 1.70090400  | 2.03648900  | C  | -4.16096700 | 0.76277700  | 0.73873300  | H | 0.65130100  | 3.10638400  | 4.74000000  |
| H  | -4.84804100 | -1.06682700  | -2.71889900 | H  | 4.84741300  | 1.06632600  | 2.71927300  | C  | -3.82694900 | -0.46259000 | -1.92056100 | H | 1.81854400  | 3.41841300  | 3.46593100  |
| C  | -5.38507700 | 2.64841100   | -0.40106100 | C  | 5.38395000  | -2.64834800 | 0.40047800  | C  | -5.58332900 | -1.67925000 | 0.03750100  | C | 4.27063800  | -1.70330700 | -2.20319400 |
| C  | -4.50855800 | 3.05711800   | 0.67440700  | C  | 4.50672000  | -3.05702900 | -0.67485700 | C  | -0.28519200 | 3.09274700  | -1.01599400 | C | -3.23384000 | -1.37483500 | -3.29735000 |
| H  | -3.64022500 | 3.71893700   | 0.56542200  | H  | 3.64041600  | -3.71890200 | -0.56575900 | C  | 1.14814600  | 3.11900900  | -0.74994000 | H | 2.38052500  | -2.05495100 | -3.30777700 |
| C  | -6.37684900 | 1.79340300   | 0.17882000  | C  | 6.37698800  | -1.79320600 | -0.17951400 | C  | 1.29558500  | 3.07576400  | 0.68865300  | H | 3.71271700  | -1.41778400 | -4.28943700 |
| H  | -7.19681000 | 1.30078900   | -0.35625900 | H  | 7.19698500  | -1.30057800 | 0.35544000  | H  | 2.24941800  | 3.09138100  | 1.20597100  | H | 2.83877600  | -0.35793200 | -3.16166400 |
| C  | -7.01311400 | -1.86359800  | 0.58941100  | C  | 7.01307700  | 1.86349400  | -0.58975000 | C  | 0.02866000  | 3.06071100  | 1.33206500  | C | 5.38101300  | -0.63261400 | -2.32889300 |
| H  | -6.88934300 | -2.51248000  | 1.41708900  | H  | 6.88982000  | 2.51286000  | -1.41624600 | H  | -0.92295500 | 3.00677900  | 0.27333400  | H | 5.00178500  | 0.38209300  | -2.14227300 |
| H  | -8.12085400 | -1.81125400  | 0.60969800  | H  | 8.12079400  | 1.81045100  | -0.60871200 | H  | -1.99495300 | 2.94385000  | 0.42450700  | H | -7.9370600  | -0.4823000  | -3.35341400 |
| H  | -6.61043100 | -0.85060800  | 0.77556100  | H  | 6.60985800  | 0.85075100  | -0.77541000 | C  | 3.69008700  | -1.71068700 | -0.76432400 | H | 6.21946700  | -0.82216400 | -1.64164100 |
| C  | -6.11999800 | 1.67420500   | 1.58220400  | C  | 6.11985100  | -1.67394300 | -1.58285300 | C  | 2.77570100  | -2.63082800 | -0.06252900 | C | 4.95439500  | -3.05799000 | -2.0628000  |
| H  | -6.71294800 | 1.08287200   | 2.28931100  | H  | 6.71269500  | -1.08249400 | -2.29027600 | H  | -2.62107800 | -2.24419700 | 1.32948900  | H | 5.69873200  | -3.30551200 | -1.73298700 |
| C  | -6.54007900 | -2.35806500  | -0.79361100 | C  | 6.53993400  | 2.35761400  | 0.79344000  | H  | 2.29422300  | -2.75628600 | 2.12171200  | H | 5.47945700  | -3.00234400 | -4.37368500 |
| C  | -4.95748500 | 2.47371900   | 1.91459900  | C  | 4.95734400  | -2.47353600 | -1.91509800 | C  | 3.70235900  | -1.13895700 | 1.51228100  | H | 4.24308600  | -3.88947800 | -2.56931200 |
| C  | -1.95535600 | -1.67725100  | -3.16404300 | C  | 1.95491900  | 1.67685200  | 3.16392000  | C  | 4.21030700  | -0.82472700 | 0.22883200  | C | 2.06121200  | -3.94946400 | -0.44367200 |
| H  | -2.07073800 | -2.75388200  | -4.26996000 | C  | 2.07026700  | 2.75323200  | 4.27014300  | H  | -4.91967400 | -0.02608500 | 0.03115900  | C | 1.51945100  | -4.01483600 | -1.88313200 |
| H  | -1.33805200 | -2.54797000  | -0.50835400 | H  | 1.33726600  | 2.54717500  | 0.50835400  | H  | -1.14149800 | 3.29594500  | -2.29442900 | H | 1.68164500  | -3.19125800 | -2.00876400 |
| H  | -3.08678700 | -2.79528000  | -4.72038900 | H  | 3.08605400  | 2.79542100  | 4.72066100  | C  | -0.81104900 | 4.67464700  | -2.91758800 | H | 0.97228700  | -4.96011000 | -2.02465300 |
| H  | -1.86698900 | -3.78602000  | -3.87124000 | H  | 1.86554100  | 3.78545100  | 3.87160000  | H  | -0.89043700 | 5.47889400  | -2.16898100 | H | 2.30870100  | -3.98522300 | -2.64302100 |
| C  | -7.14195300 | -1.39036000  | -1.93771800 | C  | 7.14157300  | 1.38974500  | 1.93823000  | C  | -1.52705300 | 4.89614700  | -3.72485700 | C | 0.8314000   | -4.16714000 | 0.46319700  |
| H  | -6.74289900 | -0.64881600  | 0.71172900  | H  | 6.74264300  | 0.64895400  | -0.71203200 | H  | 1.93417500  | 4.71567000  | -3.35425500 | H | 1.3033500   | -4.33171400 | 1.53464900  |
| H  | -8.24099800 | -1.34359700  | -1.70450000 | H  | 8.24062100  | 1.34270200  | 1.70516100  | C  | -2.64339000 | 3.34150800  | -1.92717300 | H | 0.31430600  | -5.09953700 | 0.16784300  |
| H  | -6.84482000 | -1.71778400  | -2.87807700 | H  | 6.84438800  | 1.71682100  | 2.87807400  | H  | -2.98376900 | 2.40677300  | -1.46185900 | H | 0.13107300  | -3.35119700 | 0.43435700  |
| C  | -3.96723300 | -4.29482900  | 0.80352900  | C  | 3.96775500  | 4.29489700  | -0.80282900 | H  | -3.23482400 | 3.48109400  | -2.84446300 | C | 3.05136200  | -5.11997700 | -0.23918300 |
| H  | -2.53340700 | -0.751122100 | -3.62428600 | C  | 2.53368900  | 0.75118200  | 3.62592100  | H  | -0.19417500 | 4.17463500  | -1.24894100 | C | 5.94308400  | -0.04394300 | -0.84453000 |
| H  | -0.23001100 | -2.72019000  | -2.26401400 | H  | 0.22953900  | 2.72018200  | 2.26405900  | H  | -0.99089800 | 2.18417400  | -3.35397500 | H | 2.56067400  | -6.08249000 | -0.42765600 |
| H  | -0.46242800 | -1.04043000  | -1.68989100 | H  | 0.46194100  | 1.04068000  | 1.68931000  | H  | 0.04427200  | 2.01649400  | -3.66315600 | H | 3.38098900  | -5.14313500 | 0.83866800  |
| H  | 0.20379900  | -1.34953000  | -3.32410500 | H  | -0.20447600 | 1.34913200  | 3.32353000  | H  | -1.57459400 | 2.44857100  | -4.25057500 | C | 4.19146400  | -0.55904100 | -2.83757600 |
| C  | -3.98595800 | -2.65982000  | 0.30940400  | C  | 3.98651700  | 2.65943700  | -0.30937600 | C  | 2.39295400  | 3.41357100  | -3.05840000 | C | 3.32091300  | -0.97432100 | 2.75439900  |
| H  | -3.96156300 | -6.49048200  | 0.75124500  | H  | 3.96184500  | 6.49053100  | -0.75021500 | C  | 2.34033700  | 2.87330600  | -3.05384000 | H | 4.68891400  | 1.38291100  | 3.70949500  |
| H  | -3.11472500 | -5.73357900  | -0.64213400 | H  | 3.11427800  | 5.73336400  | 0.64258400  | H  | 2.16019100  | 1.78845700  | -3.06531400 | H | 3.34869000  | 1.43757000  | 2.53378000  |
| H  | -4.90586000 | -5.74323100  | -0.58105900 | H  | 4.90539300  | 5.74314600  | 0.58250600  | C  | 5.30541500  | 3.06006300  | -3.54981000 | C | 5.56809900  | -1.16552900 | 3.12705700  |
| C  | -2.25943000 | -0.291122100 | -3.62428600 | H  | 2.25968600  | 0.29072000  | 3.62592100  | H  | 1.56901600  | 3.35564500  | -3.66457300 | H | 5.5634400   | -2.26448800 | 3.18300600  |
| H  | -1.51588500 | -0.04269100  | -4.54747400 | H  | 1.51501400  | 0.04198000  | 4.54668400  | C  | 2.58098700  | 4.95301900  | -1.64441400 | H | 5.98043900  | -0.79399000 | -2.33806000 |
| H  | -2.21595000 | 0.49891900   | -2.96858700 | H  | 2.21528300  | -0.49929200 | 2.98516000  | H  | 1.72925200  | 5.46662000  | -2.10950200 | H | 6.30855200  | -0.90232200 | 2.33808700  |
| C  | -3.26410700 | -0.25614400  | -4.23053400 | H  | 3.26328100  | 0.25542000  | 4.23029700  | H  | 3.48787700  | 5.21241300  | -2.21553800 | C | 3.24574600  | -0.92665900 | 3.98537000  |
| C  | 0.79960200  | -5.19988200  | 1.45393100  | C  | -0.79970400 | 5.20044000  | -1.45372000 | H  | 2.68770500  | 5.35446600  | -0.62559000 | H | 5.22201800  | -0.55850900 | 3.81954300  |
| H  | -0.05090300 | -5.90212500  | 1.44805600  | H  | 0.05024700  | 5.90337000  | -1.44964800 | C  | 3.65700200  | 2.80707600  | -0.96444000 | H | 3.60721500  | -0.48527800 | 4.93686500  |
| H  | 1.76804500  | -5.71004400  | 1.59201800  | H  | -1.76853900 | 5.70983200  | -1.59097500 | H  | 3.89565900  | 3.26146600  | 0.00773000  | H | 3.19523500  | -0.21848000 | 4.14577900  |
| C  | -4.39048400 | 2.77183800   | 3.29240400  | C  | 4.39015100  | -2.77160100 | -3.29283200 | H  | -0.89043700 | 5.47889400  | -2.16898100 | H | 2.30870100  | -3.98522300 | -2.64302100 |
| C  | -5.11036200 | -4.26797100  | 1.83011400  | C  | 5.11137800  | 4.26835000  | -1.82881500 | C  | 1.38037700  | 1.22919000  | -2.97614200 | H | 4.32091300  | -0.97432100 | 2.75439900  |
| H  | -6.10581600 | -4.43014800  | 1.38131100  | H  | 6.10685200  | 4.43068000  | -1.37942700 | C  | 2.39295400  | 3.41357100  | -3.05840000 | H | 4.68891400  | 1.38291100  | 3.70949500  |
| H  | -5.11712500 | -3.30897500  | 2.38605600  | H  | 5.11622200  | 3.30940500  | -2.38483600 | C  | 2.34033700  | 2.87330600  | -3.05384000 | H | 4.6891400   | 1.38291100  | 3.70949500  |
| H  | -4.94771500 | -5.08088800  | 2.56644700  | H  | 4.94898100  | 5.08132100  | -2.56514200 | C  | 2.34033700  | 2.87330600  | -3.05384000 | H | 4.          |             |             |

**Table S17:** Optimized geometries of **21**. XYZ coordinated in angstroms. BP86/def2-TZVP level of theory.

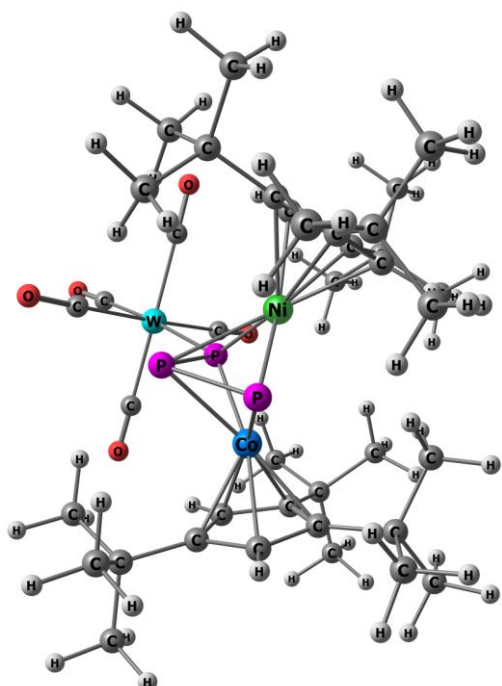

|    |              |              |              |   |              |              |              |
|----|--------------|--------------|--------------|---|--------------|--------------|--------------|
| W  | -3.526305000 | -1.077269000 | 0.065947000  | H | 0.204559000  | 5.291789000  | 2.649262000  |
| Ni | 1.966729000  | -0.630676000 | 0.237276000  | H | -0.897963000 | 4.865407000  | 3.992467000  |
| Co | 0.285094000  | 1.312704000  | 0.062146000  | H | -1.521856000 | 4.993237000  | 2.325415000  |
| P  | 0.334449000  | -0.260112000 | 1.638987000  | C | -1.601509000 | 2.357917000  | 3.158068000  |
| P  | -1.094756000 | -0.521728000 | 0.070589000  | H | -2.492426000 | 2.640757000  | 2.582337000  |
| O  | 0.498673000  | -0.395211000 | -1.361091000 | H | -1.822710000 | 2.531005000  | 4.221650000  |
| O  | -2.694030000 | -4.008621000 | -0.894815000 | H | -1.429836000 | 1.280891000  | 3.016524000  |
| O  | -3.079500000 | -1.900821000 | 3.141664000  | C | 0.826196000  | 2.775528000  | 3.624063000  |
| O  | -4.445620000 | 1.843234000  | 1.029597000  | H | 1.060993000  | 1.708751000  | 3.502460000  |
| O  | -3.900353000 | -0.284575000 | -3.026777000 | H | 0.584625000  | 2.953326000  | 4.682367000  |
| O  | -6.553724000 | 2.056314000  | 0.175134000  | H | 1.726125000  | 3.360321000  | 3.384500000  |
| C  | -2.936549000 | -2.956949000 | -0.546054000 | C | 4.211651000  | -1.695261000 | -2.173579000 |
| C  | -3.251946000 | -1.608256000 | 2.035826000  | C | 3.149336000  | -1.383350000 | -3.242055000 |
| C  | -4.102231000 | 0.792572000  | 0.675969000  | H | 2.276940000  | -2.038012000 | -3.187829000 |
| C  | -3.751471000 | -0.553751000 | -1.910034000 | H | 3.592793000  | -1.482209000 | -4.245150000 |
| C  | -5.450068000 | -1.697900000 | 0.132728000  | H | 2.794171000  | -0.350210000 | -3.129790000 |
| C  | -0.385373000 | 2.936567000  | -1.072521000 | C | 5.329221000  | -0.645675000 | -2.362019000 |
| C  | 1.052868000  | 3.022508000  | -0.817887000 | H | 4.955728000  | 0.377014000  | -2.211464000 |
| C  | 1.212539000  | 3.055206000  | 0.622683000  | H | 5.710352000  | -0.711242000 | -3.391552000 |
| H  | 2.167312000  | 3.105017000  | 1.133476000  | H | 6.172995000  | -0.817864000 | -1.677875000 |
| C  | -0.053788000 | 2.992081000  | 1.271373000  | C | 4.857471000  | -3.073153000 | -2.435097000 |
| C  | -1.016081000 | 2.888400000  | 0.222534000  | H | 5.614733000  | -3.298936000 | -1.669518000 |
| H  | -2.081218000 | 2.77572000   | 0.381752000  | H | 5.353729000  | -3.070010000 | -3.417797000 |
| C  | 3.681180000  | -1.644763000 | -0.731736000 | H | 4.123678000  | -3.886280000 | -2.436225000 |
| C  | 2.780921000  | -2.532885000 | 0.026938000  | C | 2.005462000  | -3.814967000 | -0.299225000 |
| C  | 2.866421000  | -2.096047000 | 1.403155000  | C | 1.441608000  | -3.896426000 | -1.724466000 |
| H  | 2.343722000  | -2.563541000 | 2.229396000  | H | 0.778585000  | -3.042199000 | -1.928591000 |
| C  | 3.731632000  | -0.968535000 | 1.518218000  | H | 0.844406000  | -4.814697000 | -1.824215000 |
| C  | 4.214242000  | -0.709486000 | 0.208531000  | H | 2.218818000  | -3.926651000 | -2.495567000 |
| H  | 4.800411000  | 0.090369000  | -0.045669000 | C | 0.790509000  | -3.952500000 | 0.647039000  |
| C  | -1.243429000 | 3.024380000  | -2.344154000 | H | 1.084083000  | -4.054513000 | 1.700231000  |
| C  | -0.952302000 | 4.365393000  | -3.054054000 | H | 0.220091000  | -4.852871000 | 0.378057000  |
| H  | -1.808615000 | 5.209993000  | -2.360797000 | H | 0.122901000  | -3.084653000 | 0.557708000  |
| H  | -1.655214000 | 4.498978000  | -3.889995000 | C | 2.945956000  | -5.016938000 | -0.036406000 |
| H  | 0.063621000  | 4.412901000  | -3.462126000 | H | 3.828715000  | -4.999311000 | -0.688639000 |
| H  | -2.739462000 | 3.03702000   | -1.964231000 | H | 2.407353000  | -5.960711000 | -0.212422000 |
| H  | -3.029594000 | 2.110610000  | -1.451209000 | H | 3.297074000  | -5.011720000 | 1.006002000  |
| H  | -3.341150000 | 3.106894000  | -2.881336000 | C | 4.162176000  | -0.260542000 | 2.785847000  |
| H  | -2.999677000 | 3.891131000  | -1.322573000 | C | 4.137726000  | 1.263135000  | 2.573243000  |
| C  | -1.066989000 | 1.945623000  | -3.317908000 | H | 4.812182000  | 1.565732000  | 1.759190000  |
| H  | -0.34170000  | 1.700442000  | -3.641053000 | H | 4.454746000  | 1.785341000  | 3.488814000  |
| H  | -1.89956000  | 2.010589000  | -4.210113000 | H | 3.122610000  | 1.590813000  | 2.314234000  |
| H  | -1.400601000 | 0.912728000  | -2.844891000 | C | 5.605100000  | -0.707154000 | 3.114398000  |
| C  | 2.274302000  | 3.256634000  | -1.707671000 | H | 5.654054000  | -1.796957000 | 3.255458000  |
| C  | 2.193250000  | 2.625743000  | -3.102785000 | H | 5.956020000  | -0.225503000 | 4.038988000  |
| H  | 1.986001000  | 1.549637000  | -3.026263000 | H | 6.295111000  | -0.438163000 | 2.301072000  |
| H  | 3.158286000  | 2.752292000  | -3.615793000 | C | 3.240238000  | -0.628616000 | 3.958809000  |
| H  | 1.425252000  | 3.081893000  | -3.735876000 | H | 2.190603000  | -0.382791000 | 3.737838000  |
| C  | 2.469417000  | 4.787317000  | -1.830810000 | H | 3.539865000  | -0.076416000 | 4.861969000  |
| H  | 1.607733000  | 5.270107000  | -2.309997000 | H | 3.295557000  | -1.702701000 | 4.190398000  |
| H  | 3.365565000  | 5.005654000  | -2.431873000 | H | 4.392664000  | 2.781354000  | -1.707771000 |
| H  | 2.602350000  | 5.241140000  | -0.837662000 | H | 3.377050000  | 1.593910000  | -0.832934000 |
| C  | 3.529250000  | 2.663086000  | -1.036655000 | C | -0.365165000 | 3.172363000  | 2.742276000  |
| H  | 3.781182000  | 3.161964000  | -0.091486000 | C | -0.663071000 | 4.679550000  | 2.937154000  |

**Table S18:** Optimized geometries of **22** (left) and **23** (right). XYZ coordinated in angstroms. BP86/def2-TZVP level of theory.

|    |              |              |              |   |              |              |              |    |              |              |              |    |              |              |              |
|----|--------------|--------------|--------------|---|--------------|--------------|--------------|----|--------------|--------------|--------------|----|--------------|--------------|--------------|
| Co | -1.754708000 | -0.408020000 | 0.050965000  | C | 5.562188000  | -1.205663000 | -2.069134000 | Co | 1.812021000  | -0.238691000 | -0.139104000 | H  | 2.298173000  | 2.274487000  | 2.296986000  |
| Ni | 1.862263000  | 0.147785000  | 0.036794000  | H | 5.798419000  | -0.199829000 | -2.460564000 | Ni | -1.747351000 | 0.246863000  | -0.131671000 | C  | 5.939400000  | 2.983672000  | -0.418321000 |
| P  | -0.045690000 | -0.254447000 | -1.328202000 | H | 5.872525000  | -1.942976000 | -2.835950000 | C  | 3.484583000  | -0.414694000 | -1.326747000 | H  | 5.537263000  | 2.733952000  | 0.667737000  |
| P  | -0.124792000 | 0.284062000  | 1.345000000  | H | 6.213132000  | -1.365377000 | -1.185187000 | H  | 3.484101000  | -0.337426000 | -2.407729000 | H  | 5.611234000  | 3.542263000  | -0.888284000 |
| P  | 0.192713000  | -1.671346000 | 0.336290000  | C | 3.763307000  | -2.769535000 | -1.277591000 | C  | -3.310276000 | 1.526315000  | 0.564930000  | H  | 6.123917000  | 1.849859000  | -0.855985000 |
| C  | -3.385218000 | -0.898632000 | -1.176876000 | H | 4.265942000  | -3.076988000 | -0.416820000 | H  | -3.136245000 | 2.309153000  | 1.294718000  | C  | -5.438101000 | 0.049967000  | 2.672187000  |
| H  | -3.295093000 | -1.204812000 | -2.210643000 | H | 3.975229000  | -3.473819000 | -2.097718000 | C  | -3.465238000 | 0.412790000  | -1.410292000 | H  | -5.700055000 | 1.100459000  | 2.474449000  |
| C  | 3.765871000  | -0.149518000 | 0.727248000  | H | 2.700722000  | -2.860624000 | -1.006322000 | H  | -3.431594000 | 0.189727000  | -2.470772000 | H  | -5.644857000 | -0.162342000 | 3.734203000  |
| C  | -3.389435000 | -1.776508000 | -0.061915000 | C | -3.108938000 | 2.855218000  | 1.561255000  | C  | -3.166498000 | 1.689680000  | -0.845098000 | H  | -6.097930000 | -0.582113000 | 2.062161000  |
| C  | -3.461782000 | 0.485126000  | -0.736723000 | H | -2.024133000 | 2.725188000  | 1.432381000  | C  | 3.313434000  | -1.636670000 | -0.604833000 | C  | -4.215765000 | 3.619377000  | -2.005205000 |
| C  | -3.489249000 | -0.956548000 | 1.099407000  | H | -3.277464000 | 3.512880000  | 2.428888000  | C  | 3.801408000  | 0.697330000  | 2.344252000  | H  | -4.797932000 | 2.942868000  | -2.662488000 |
| H  | -3.509487000 | -1.328109000 | 2.118115000  | H | -3.507022000 | 3.368634000  | 0.679435000  | C  | -3.945638000 | -0.202773000 | 2.350856000  | H  | -4.045114000 | 4.559100000  | -2.556049000 |
| C  | 3.277425000  | 1.158915000  | 1.067995000  | C | -3.563515000 | 1.059961000  | -3.188126000 | C  | 3.383119000  | -1.286160000 | 0.775691000  | H  | -4.821146000 | 3.845420000  | -1.114098000 |
| H  | 3.178614000  | 1.537802000  | 2.079155000  | H | -2.647898000 | 0.487848000  | -3.398247000 | H  | 3.258887000  | -1.988102000 | 1.593914000  | C  | -5.615233000 | -2.281901000 | -0.150049000 |
| C  | 3.678699000  | -0.255528000 | -0.725208000 | H | -3.617918000 | 1.889674000  | -3.905656000 | H  | -3.676901000 | 0.173162000  | 0.888125000  | H  | -5.806303000 | -2.284813000 | 0.948977000  |
| C  | -3.520155000 | 0.440465000  | 0.729968000  | H | -4.433446000 | 0.406878000  | -3.353413000 | C  | 3.576412000  | 0.131616000  | 0.936074000  | H  | -5.956811000 | -3.275049000 | -0.484365000 |
| C  | 3.170639000  | 1.010682000  | -1.195446000 | C | 3.337117000  | -2.299829000 | 2.066621000  | C  | -2.871991000 | 2.969161000  | -1.600945000 | H  | -6.355312000 | -1.355959000 | -0.478199000 |
| H  | 2.976581000  | 1.249088000  | -2.235532000 | H | 2.941638000  | -1.940672000 | 2.364775000  | C  | -2.871980000 | -0.538370000 | -0.383417000 | C  | 2.871980000  | 1.338378000  | -0.644030000 |
| C  | 2.917598000  | 1.890115000  | -0.103303000 | H | 3.740389000  | -2.933673000 | 2.874183000  | C  | 3.851993000  | 0.896301000  | -0.417542000 | H  | 1.924337000  | 2.819393000  | -1.095778000 |
| C  | 4.076845000  | -1.335589000 | -1.737723000 | H | 3.201498000  | -2.922319000 | 1.177483000  | C  | 4.091681000  | 2.063050000  | -2.490703000 | H  | 3.151996000  | 4.119698000  | -1.064783000 |
| C  | -3.394434000 | -3.291151000 | -0.115378000 | C | 3.704661000  | 4.238412000  | -0.313185000 | H  | 4.893267000  | 1.385589000  | -2.820264000 | H  | 2.689657000  | 3.263195000  | 0.426754000  |
| C  | 4.279566000  | -1.101454000 | 1.819404000  | H | 4.378029000  | 4.107263000  | 0.547690000  | H  | 4.324934000  | 3.072855000  | -2.861392000 | C  | -2.682961000 | 3.952998000  | -0.720663000 |
| C  | 2.458126000  | 3.333223000  | -0.175621000 | H | 3.413191000  | 5.300543000  | -0.365190000 | C  | 1.148653000  | 1.743037000  | -2.857206000 | H  | -2.653178000 | 4.237311000  | 0.176477000  |
| C  | -3.539281000 | 1.634316000  | -1.755043000 | H | 4.267503000  | 3.990129000  | -1.226044000 | C  | 3.970939000  | 2.102541000  | -0.951233000 | H  | -1.861013000 | 4.873189000  | -1.283794000 |
| C  | -2.870421000 | -3.886947000 | 1.201469000  | C | -4.848072000 | 2.433688000  | -1.576711000 | C  | 5.304314000  | 0.562848000  | 2.685623000  | H  | -1.134261000 | 3.501450000  | -0.393027000 |
| H  | -1.842986000 | -3.544593000 | 1.394569000  | H | -5.719183000 | 1.761000000  | -1.605477000 | H  | 5.157723000  | -0.490379000 | 2.627353000  | C  | -4.377544000 | -2.095279000 | -2.282279000 |
| H  | -2.870221000 | -4.980953000 | 1.146710000  | H | -4.951515000 | 3.169928000  | -2.389580000 | H  | 5.503166000  | 0.929441000  | 3.708609000  | H  | -5.048223000 | -1.375076000 | -2.686588000 |
| H  | -3.499068000 | -3.593050000 | 2.055272000  | H | -4.876787000 | 2.981542000  | -0.627536000 | H  | 5.922728000  | 1.138379000  | 1.986756000  | H  | -4.729789000 | -3.109621000 | -2.524927000 |
| C  | -3.782580000 | 1.496799000  | 1.810663000  | C | 4.374457000  | -0.352544000 | 3.167470000  | C  | -4.229317000 | -1.965504000 | -0.750047000 | H  | -3.415109000 | -1.944844000 | -2.792615000 |
| C  | 3.294944000  | -1.139661000 | -3.055771000 | H | 5.034479000  | 0.529132000  | 3.099520000  | C  | -3.100841000 | 0.697401000  | 3.282090000  | C  | -2.052776000 | 2.674718000  | -2.870879000 |
| H  | 2.210655000  | -1.120583000 | -2.869408000 | H | 4.784107000  | -1.031891000 | 3.930716000  | H  | -2.033938000 | 0.625335000  | 3.020062000  | H  | -1.096177000 | 2.197124000  | -2.610912000 |
| H  | 3.524684000  | -1.959360000 | -3.746091000 | H | 3.385540000  | -0.019141000 | 3.513691000  | H  | -3.231354000 | 0.370014000  | 4.325205000  | H  | -1.848478000 | 3.690730000  | -3.417346000 |
| H  | 3.571162000  | -0.197410000 | -3.560954000 | C | -5.312006000 | 1.689525000  | 1.944968000  | H  | -3.403538000 | 1.752248000  | 3.229211000  | H  | -2.593532000 | 1.998820000  | -3.549687000 |
| C  | -2.518397000 | -3.797725000 | -1.274344000 | H | -5.761288000 | 2.053918000  | 1.011879000  | C  | 2.996481000  | -0.127826000 | 3.374705000  | C  | 2.643041000  | -3.009917000 | -2.607997000 |
| H  | -2.867269000 | -3.410336000 | -2.242986000 | H | -5.539347000 | 2.414306000  | 2.743898000  | H  | 1.926861000  | -0.123370000 | 3.116068000  | H  | 2.573955000  | -4.002174100 | -3.016891000 |
| H  | -2.546303000 | -4.980660000 | -1.320973000 | H | -5.794051000 | 0.733512000  | 2.200262000  | H  | 3.119638000  | 0.314743000  | 4.375411000  | H  | 3.274198000  | -2.406228000 | -3.285251000 |
| H  | -1.475777000 | -3.475902000 | -1.133782000 | H | 1.689530000  | 3.723354000  | 1.098599000  | H  | 3.335922000  | -1.170931000 | 3.432549000  | H  | 1.635087000  | -2.559578000 | -2.603613000 |
| C  | -4.852126000 | -3.758247000 | -0.337377000 | H | 0.815089000  | 3.069118000  | 1.233680000  | C  | 3.220265000  | -0.035083000 | -1.183501000 | C  | 2.328454000  | -3.931842000 | -0.307820000 |
| H  | -5.501666000 | -3.403748000 | 0.477584000  | H | 1.346742000  | 4.767907000  | 1.031538000  | C  | -3.197896000 | -3.037192000 | -0.338651000 | H  | 1.308640000  | -3.523147000 | -0.253660000 |
| H  | -4.908260000 | -4.856356000 | -0.371903000 | H | 2.322022000  | 3.634282000  | 1.994442000  | H  | -2.294640000 | -2.833726000 | -0.829182000 | H  | 2.718286000  | -4.007120000 | 1.716205000  |
| H  | -5.248328000 | -3.362464000 | -1.284860000 | C | -2.319709000 | 2.578460000  | -1.707274000 | H  | -3.945907000 | -4.035440000 | -0.648503000 | H  | 2.282494000  | -4.949810000 | -0.726730000 |
| C  | 5.704599000  | -1.598853000 | 1.498775000  | H | -2.136865000 | 2.994605000  | -0.713335000 | H  | -3.014144000 | -3.056962000 | 0.738999000  | C  | 4.246685000  | -3.632265000 | -1.230206000 |
| H  | 5.737268000  | -2.227177000 | 0.601729000  | H | -2.463383000 | 3.412551000  | -2.444202000 | C  | -3.579239000 | -1.647876000 | 2.725095000  | H  | 4.830251000  | -4.649926000 | -1.654016000 |
| H  | 6.092383000  | -2.196790000 | 2.339717000  | H | -1.417385000 | 2.020410000  | -1.993754000 | H  | -4.199673000 | -2.391436000 | 2.213369000  | H  | 5.078892000  | -3.885650000 | -0.219343000 |
| H  | 6.384737000  | -0.747806000 | 1.340251000  | C | 1.541837000  | 3.551416000  | -1.391895000 | H  | -3.720707000 | -1.791072000 | 3.807883000  | H  | 5.308971000  | -3.009933000 | -1.851414000 |
| C  | -3.254954000 | 1.004932000  | 3.177075000  | H | 2.059783000  | 3.317049000  | -2.333782000 | H  | -2.524112000 | -1.848139000 | 2.486050000  | As | -0.034419000 | -0.580300000 | -1.491990000 |
| H  | -3.783615000 | 0.107521000  | 3.527989000  | H | 1.215330000  | 4.602388000  | -1.439951000 | C  | 3.363899000  | 2.155739000  | 2.544152000  | H  | -0.146201000 | -1.285181000 | 0.884085000  |
| H  | -3.406679000 | 1.792455000  | 3.931010000  | H | 0.652382000  | 2.909600000  | -1.324492000 | H  | 3.944145000  | 2.860994000  | 1.939912000  | As | 0.204799000  | 1.130899000  | 0.840480000  |
| H  | -2.179688000 | 0.777949000  | 3.117870000  |   |              |              |              | H  | 3.504952000  | 2.434665000  | 3.600615000  |    |              |              |              |







## 6. References

- [1] S. Stoll, A. Schweiger, *J. Magn. Reson.* **2006**, *178*, 42.
- [2] C. Riesinger, L. Dütsch, G. Balazs, M. Bodensteiner, M. Scheer, *Chem. Eur. J.* **2020**, *26*, 17165-17170.
- [3] R. C. Clark, J. S. Reid, *Acta Cryst.* **1995**, *A51*, 887.
- [4] G. M. Sheldrick, *Acta Cryst.* **2015**, *C71*, 3.
- [5] O. V. Dolomanov, I. J. Bourhis, R. J. Gildea, Howard, J. A. K., H. Puschmann, *J. Appl. Cryst.* **2009**, *42*, 339.
- [6] M. J. Frisch, G. W. Trucks, H. B. Schlegel, G. E. Scuseria, M. A. Robb, J. R. Cheeseman, G. Scalmani, V. Barone, B. Mennucci, G. A. Petersson, H. Nakatsuji, M. Caricato, X. Li, H. P. Hratchian, A. F. Izmaylov, J. Bloino, G. Zheng, J. L. Sonnenberg, M. Hada, M. Ehara, K. Toyota, R. Fukuda, J. Hasegawa, M. Ishida, T. Nakajima, Y. Honda, O. Kitao, H. Nakai, T. Vreven, J. A. Montgomery, Jr., J. E. Peralta, F. Ogliaro, M. Bearpark, J. J. Heyd, E. Brothers, K. N. Kudin, V. N. Staroverov, T. Keith, R. Kobayashi, J. Normand, K. Raghavachari, A. Rendell, J. C. Burant, S. S. Iyengar, J. Tomasi, M. Cossi, N. Rega, J. M. Millam, M. Klene, J. E. Knox, J. B. Cross, V. Bakken, C. Adamo, J. Jaramillo, R. Gomperts, R. E. Stratmann, O. Yazyev, A. J. Austin, R. Cammi, C. Pomelli, J. W. Ochterski, R. L. Martin, K. Morokuma, V. G. Zakrzewski, G. A. Voth, P. Salvador, J. J. Dannenberg, S. Dapprich, A. D. Daniels, O. Farkas, J. B. Foresman, J. V. Ortiz, J. Cioslowski, and D. J. Fox, Gaussian, Inc., Wallingford CT, 2013.
- [7] a) J. P. Perdew, *Phys. Rev. B*, 1986, 8822; b) A. D. Becke, *Phys. Rev. A*, 1988, 3098.
- [8] a) J. Tomasi, B. Mennucci, R. Cammi, *Chem. Rev.* **2005**, *105*, 2999; b) G. Scalmani, M. J. Frisch, *J. Chem. Phys.* **2010**, *132*, 114110.
- [9] NBO 6.0. E. D. Glendening, J. K. Badenhoop, A. E. Reed, J. E. Carpenter, J. A. Bohmann, C. M. Morales, C. R. Landis, and F. Weinhold (Theoretical Chemistry Institute, University of Wisconsin, Madison, WI, 2013), <http://nbo6.chem.wisc.edu>.
- [10] a) S. Grimme, J. Antony, S. Ehrlich, H. Krieg, *J. Chem. Phys.* **2010**, *132*, 154104; b) S. Grimme, S. Ehrlich, L. Goerigk, *J. Comp. Chem.* **2011**, *32*, 1456.
- [11] Chemcraft - graphical software for visualization of quantum chemistry computations. <https://www.chemcraftprog.com>.
